# Supplementary material for: Integrative analysis of metabolite GWAS illuminates the molecular basis of pleiotropy and genetic correlation
Source: eLife journal article supplement (doi:10.7554/elife.79348), 2022-09-07
Supplement: supp [file elife-79348-supp-v1.zip]

Archive with 31 entries (31 files):
- elife_poa_e79348_Figure_2_figure_supplement_1.pdf
- elife_poa_e79348_Figure_2_figure_supplement_2.pdf
- elife_poa_e79348_Figure_2_figure_supplement_3.pdf
- elife_poa_e79348_Figure_2_figure_supplement_4.pdf
- elife_poa_e79348_Figure_3_figure_supplement_1.pdf
- elife_poa_e79348_Figure_3_figure_supplement_2.tif
- elife_poa_e79348_Figure_4_figure_supplement_1.pdf
- elife_poa_e79348_Figure_4_figure_supplement_2.tif
- elife_poa_e79348_Figure_4_figure_supplement_3.pdf
- elife_poa_e79348_Figure_4_figure_supplement_4.pdf
- elife_poa_e79348_Figure_4_figure_supplement_5.pdf
- elife_poa_e79348_Figure_4_figure_supplement_6.tif
- elife_poa_e79348_Figure_4_figure_supplement_7.pdf
- elife_poa_e79348_Figure_5_figure_supplement_1.pdf
- elife_poa_e79348_Figure_5_figure_supplement_2.pdf
- elife_poa_e79348_Figure_6_figure_supplement_1.pdf
- elife_poa_e79348_Figure_7_figure_supplement_1.pdf
- elife_poa_e79348_Figure_7_figure_supplement_2.pdf
- elife_poa_e79348_Figure_7_figure_supplement_3.tif
- elife_poa_e79348_Figure_7_figure_supplement_4.pdf
- elife_poa_e79348_Figure_7_figure_supplement_5.pdf
- elife_poa_e79348_Figure_7_figure_supplement_6.pdf
- elife_poa_e79348_Supplementary_file_1.tsv
- elife_poa_e79348_Supplementary_file_2.xlsx
- elife_poa_e79348_Supplementary_file_3.tsv
- elife_poa_e79348_Supplementary_file_4.tsv
- elife_poa_e79348_Supplementary_file_5.tsv
- elife_poa_e79348_Supplementary_file_6.tsv
- elife_poa_e79348_Supplementary_file_7.tsv
- elife_poa_e79348_Supplementary_file_8.xlsx
- elife_poa_e79348_Supplementary_file_9.tsv
