# Supplementary material for: Integrative analysis of metabolite GWAS illuminates the molecular basis of pleiotropy and genetic correlation
Source: eLife journal article supplement (doi:10.7554/elife.79348), 2022-09-07

(a) Additional Variant Model 1

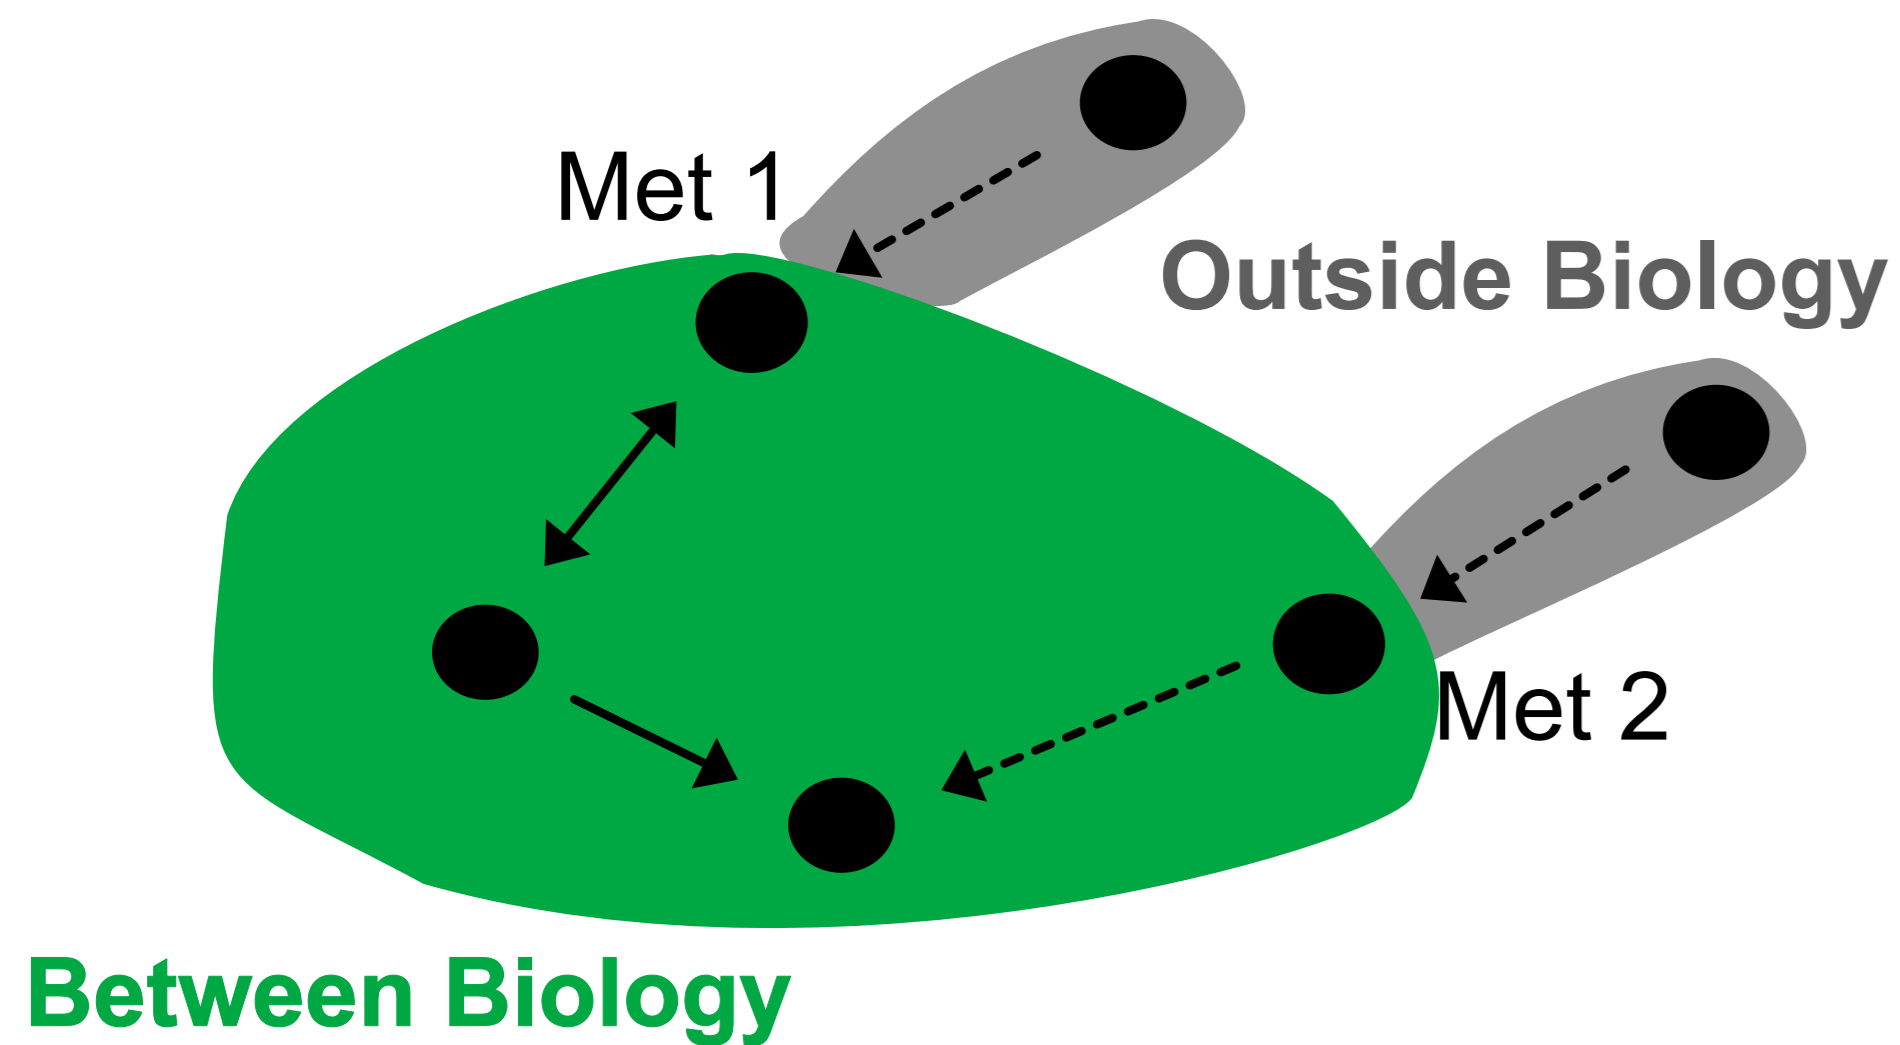

(b) Additional Discordant Variant Model 1

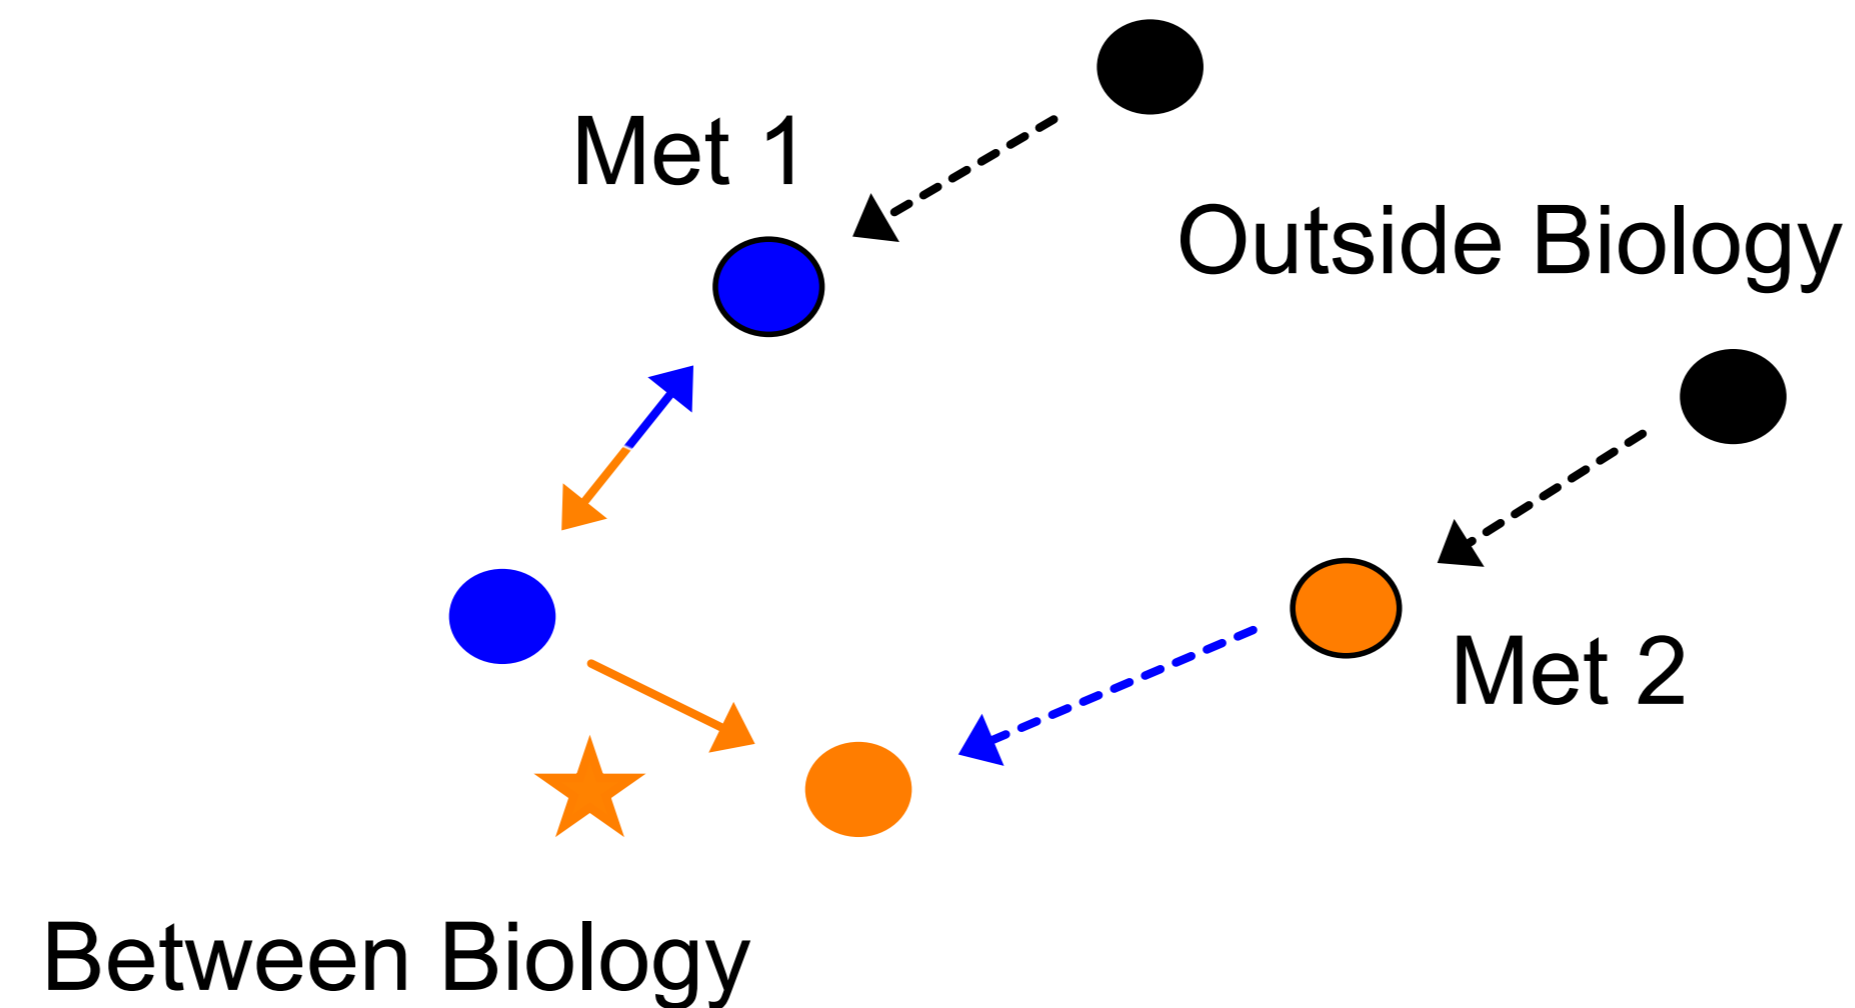

(c) Additional Concordant Variant Model 1

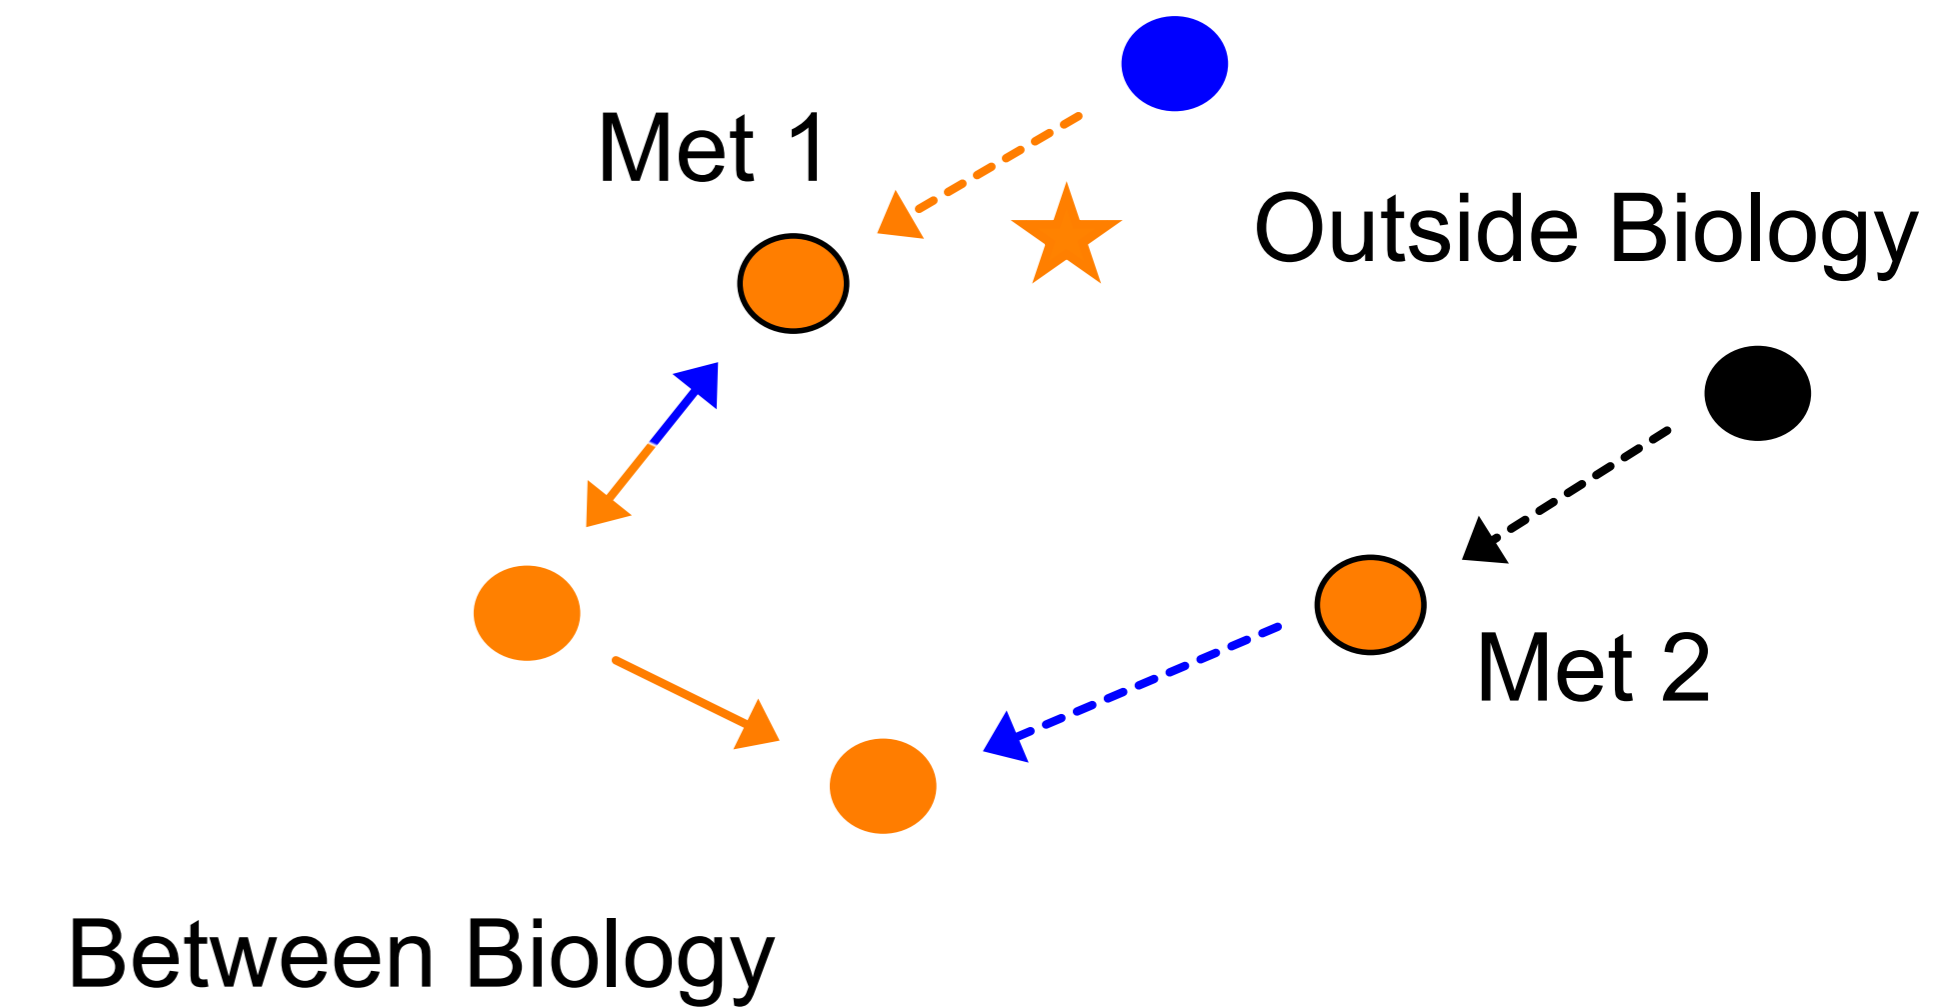

(d) Additional Variant Model 2

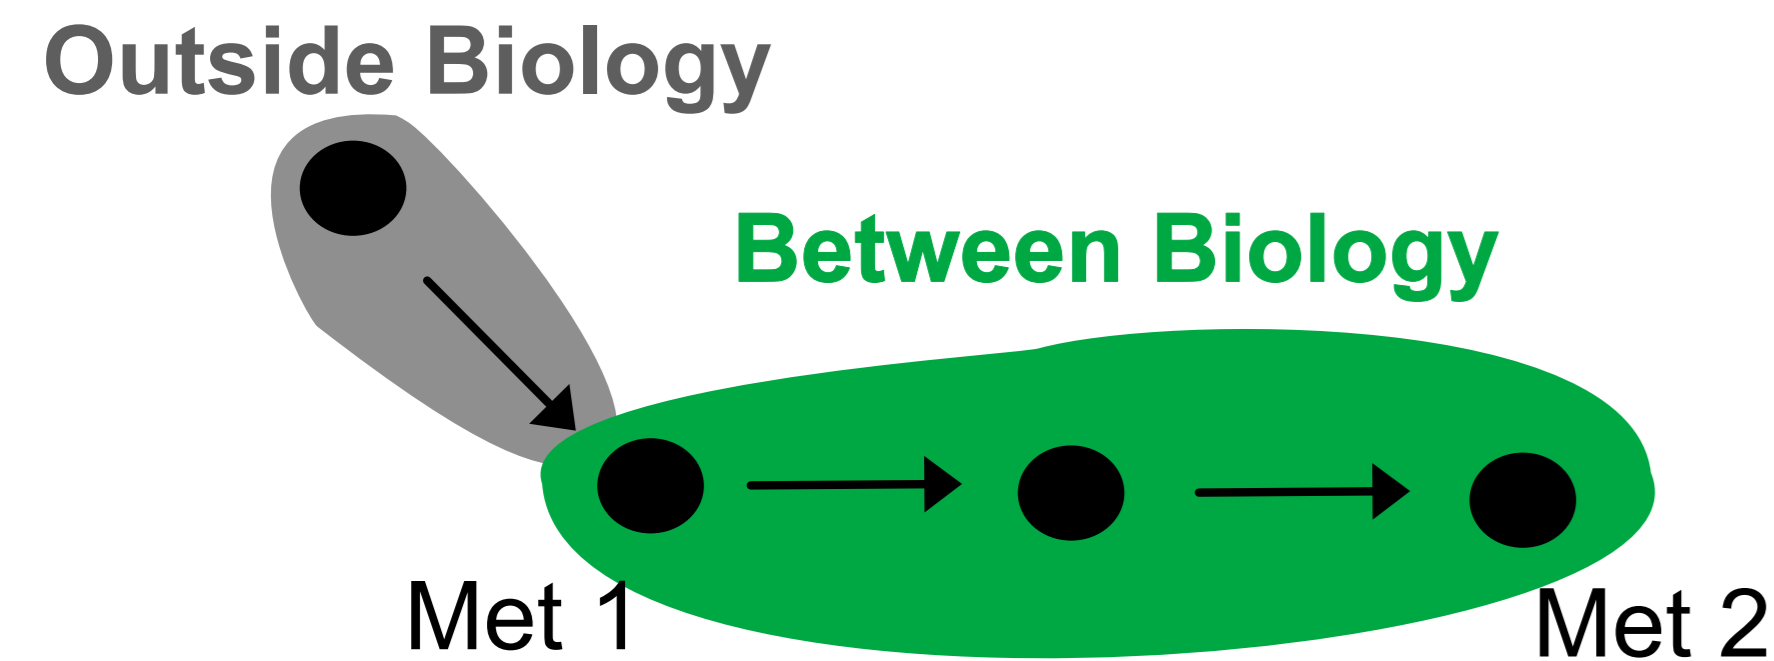

(e) Additional Discordant Variant Model 2

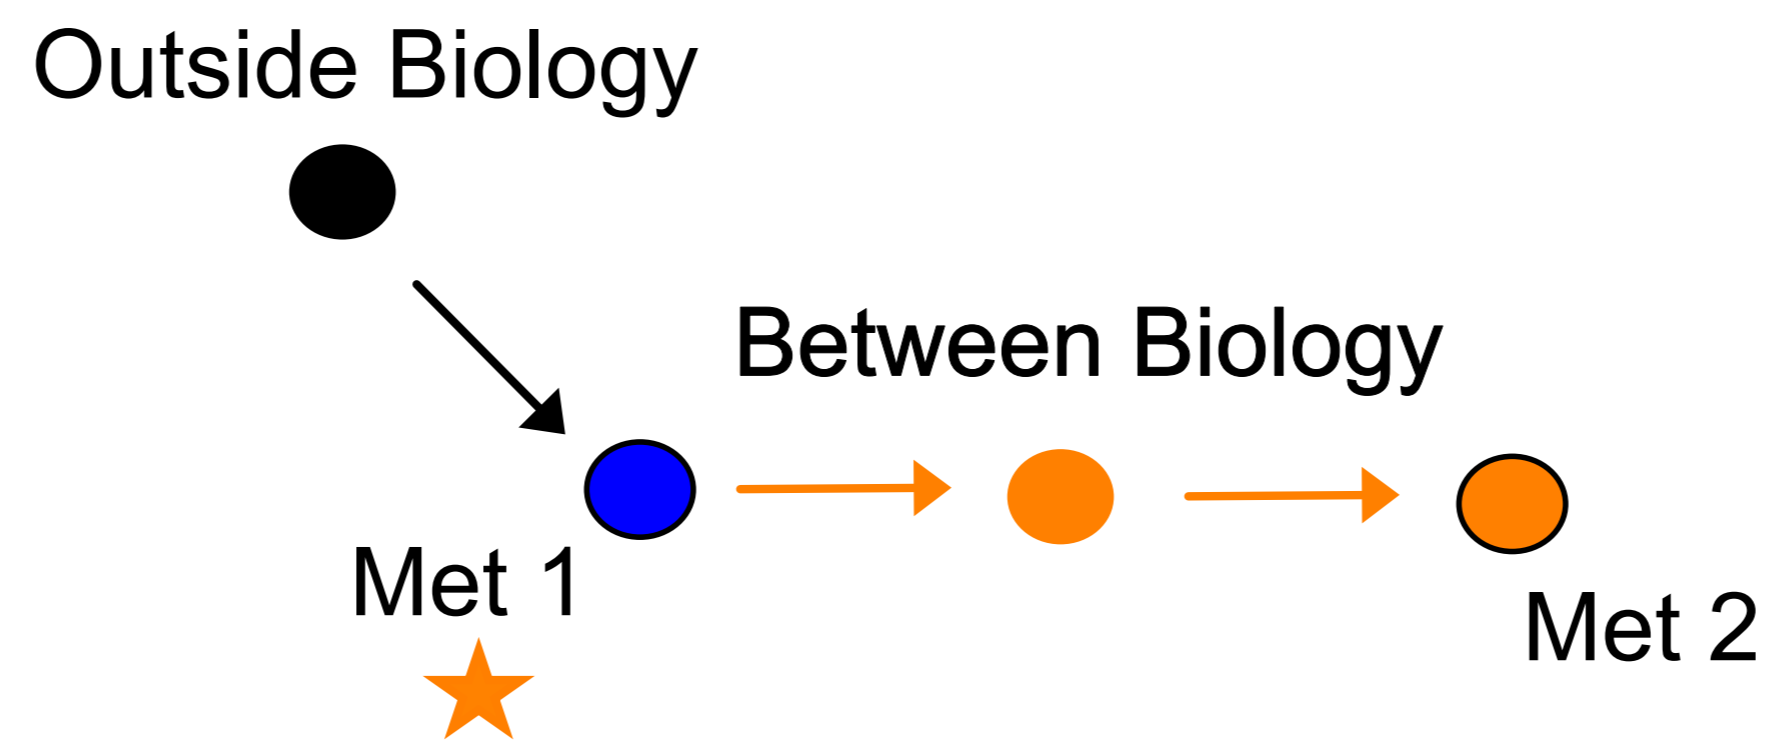

(f) Additional Concordant Variant Model 2

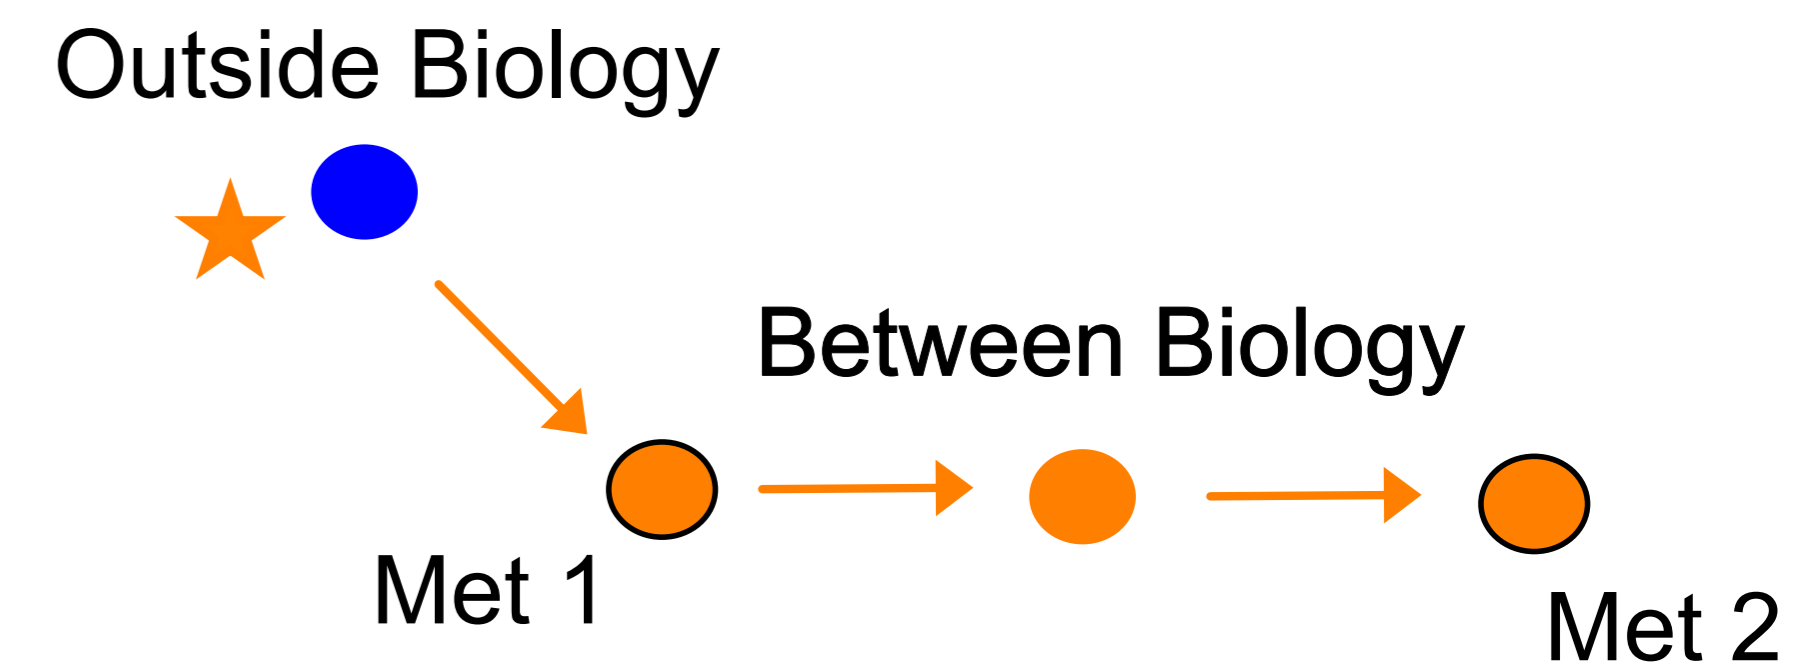

Supplement: supp [file elife-79348-supp-v1.zip › elife_poa_e79348_Figure_5_figure_supplement_1.pdf]
