# Supplementary figures and images for: Integrative analysis of metabolite GWAS illuminates the molecular basis of pleiotropy and genetic correlation
Source: eLife journal article supplement (doi:10.7554/elife.79348), 2022-09-07

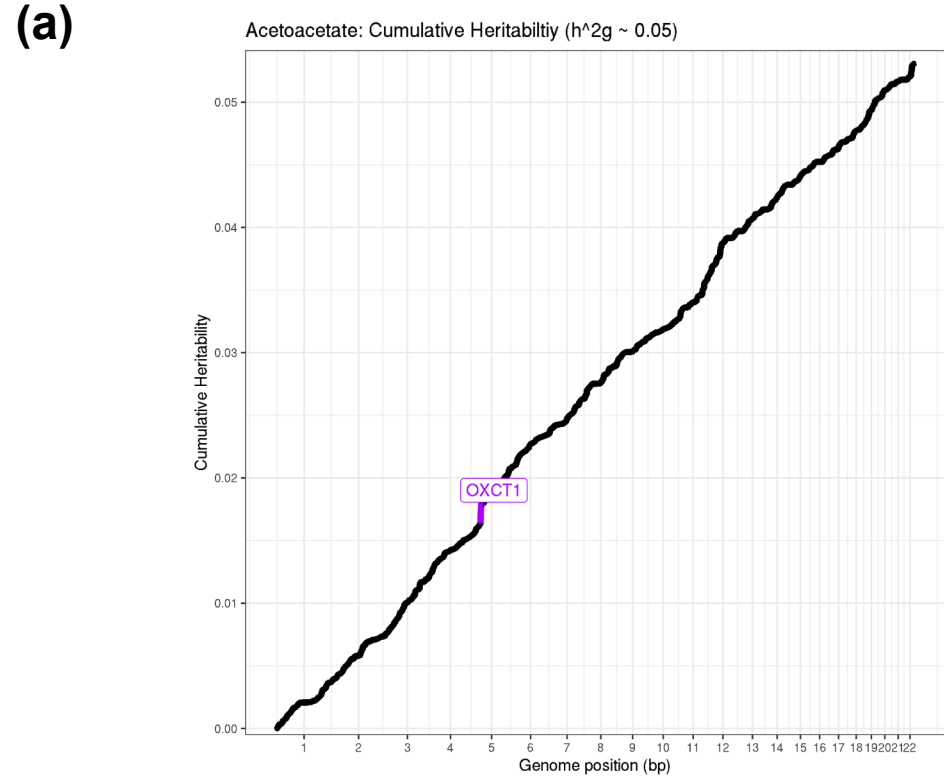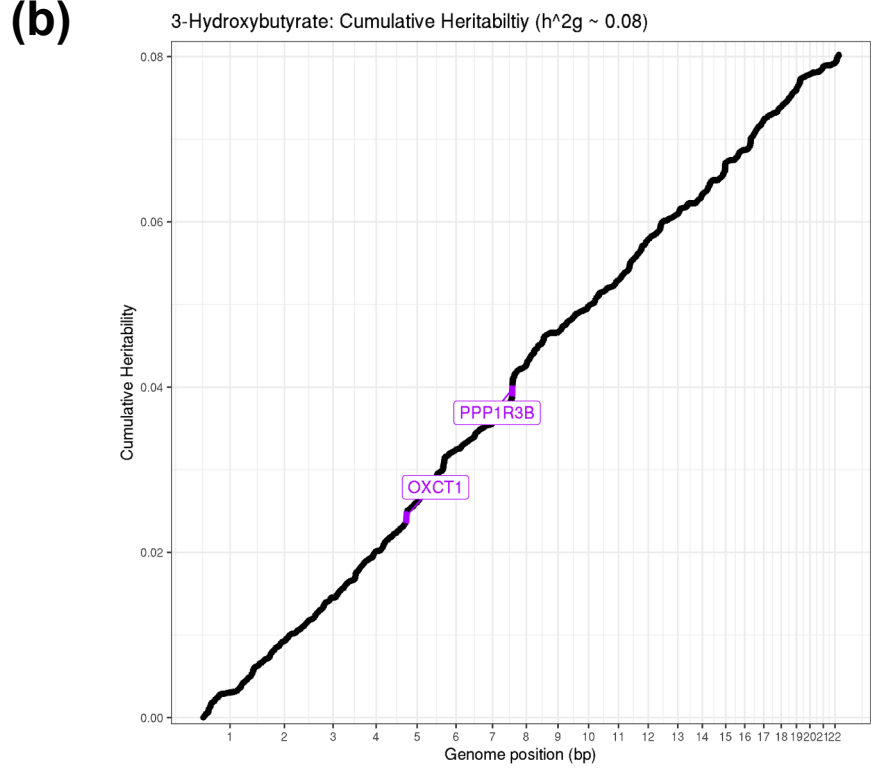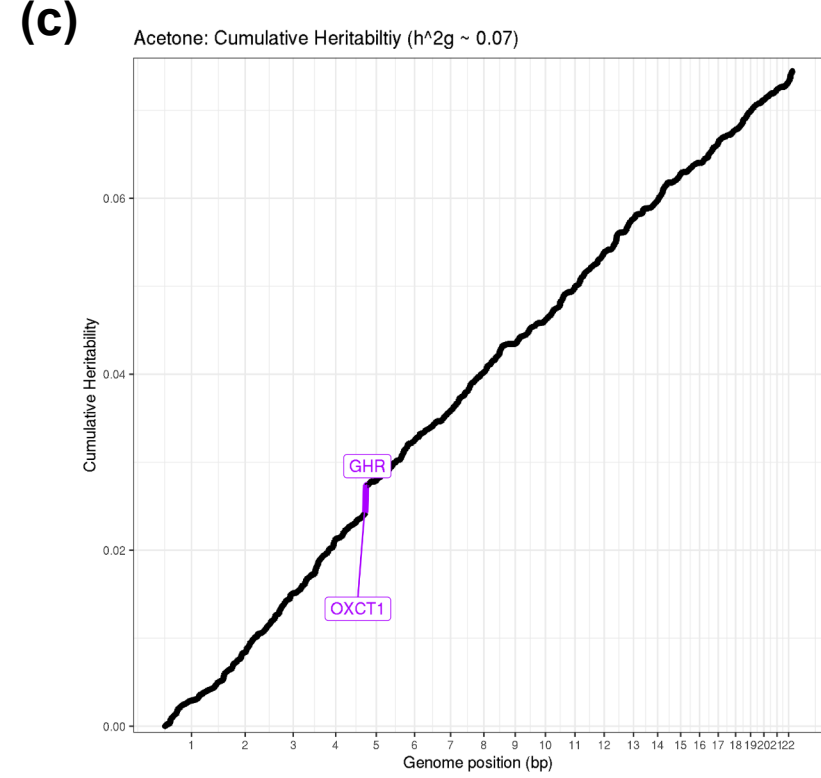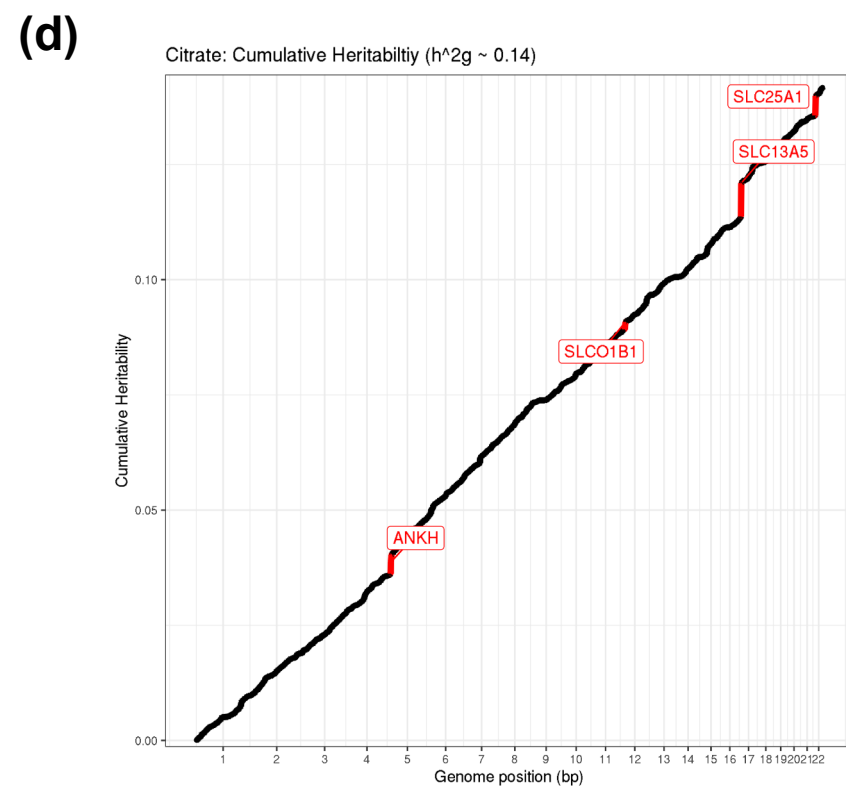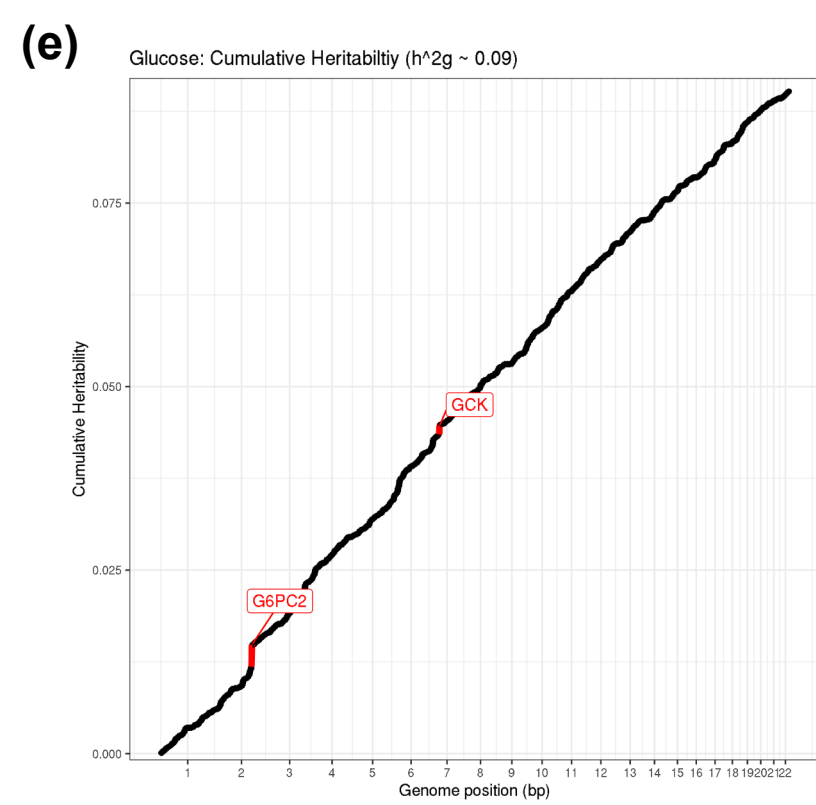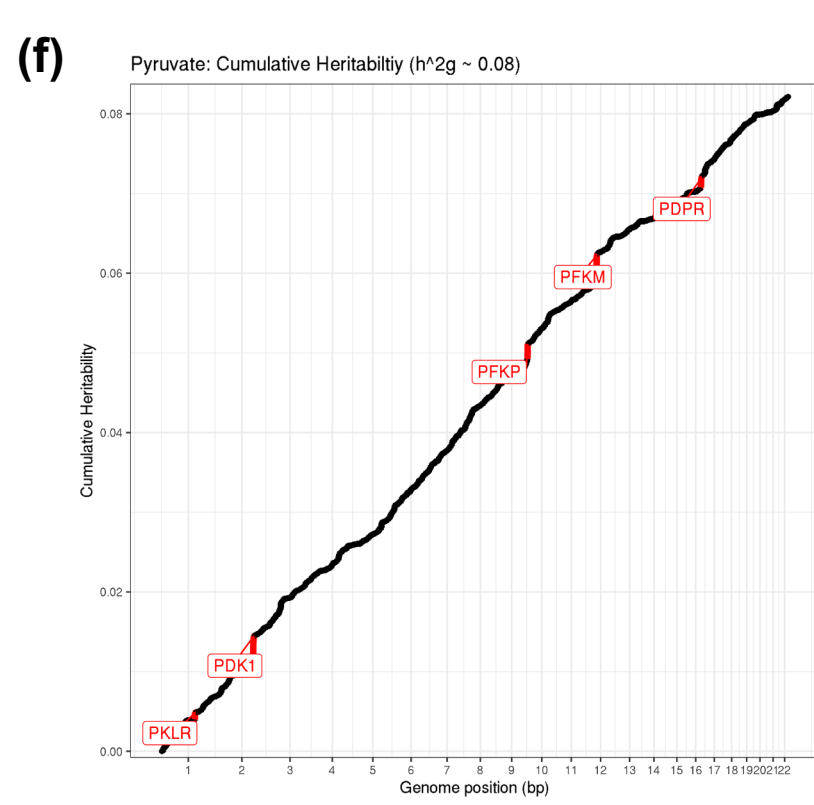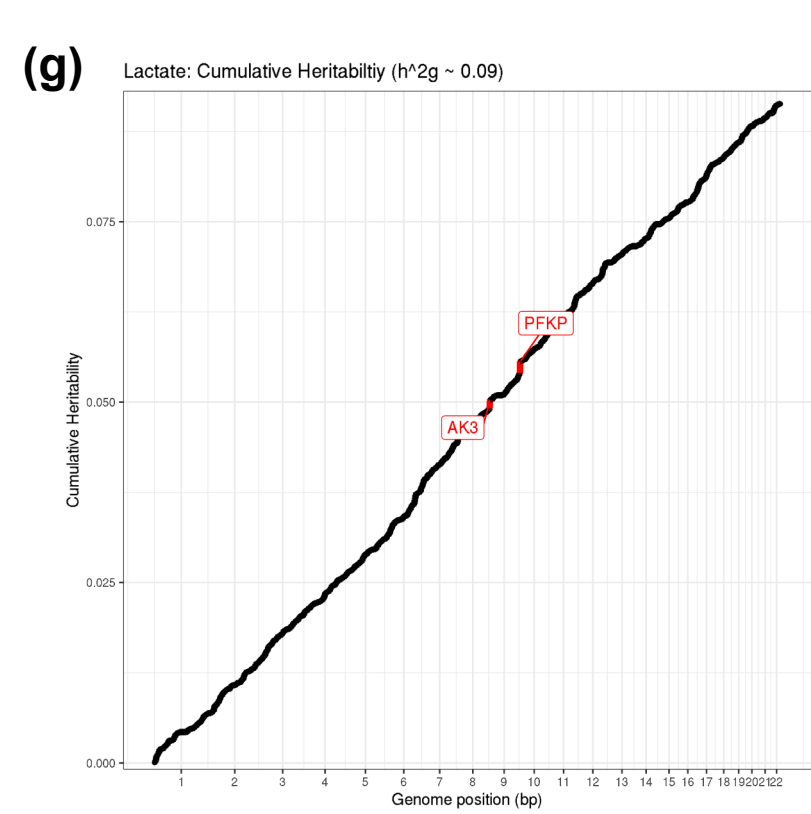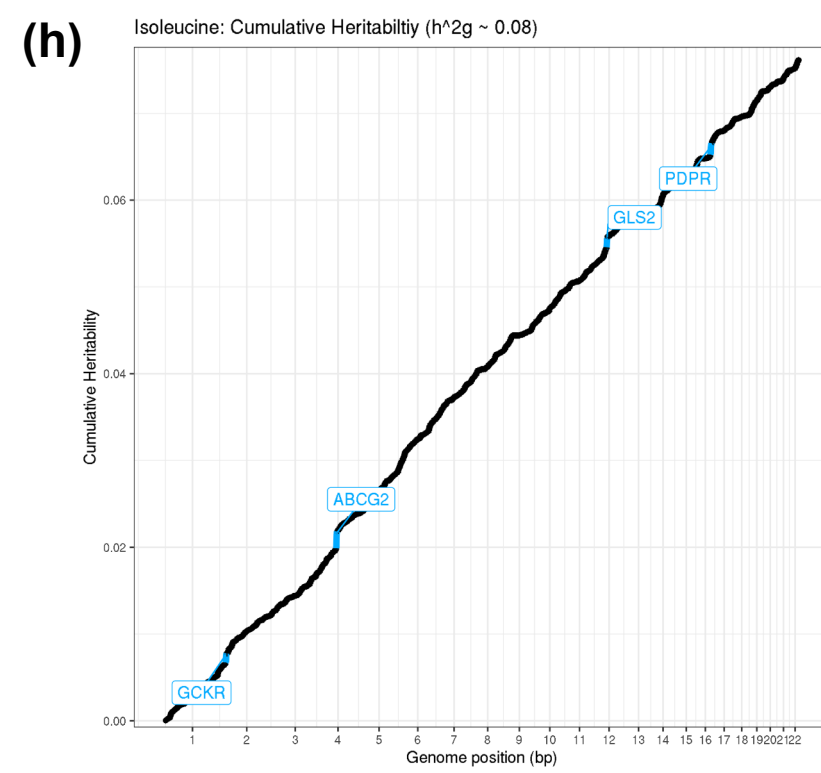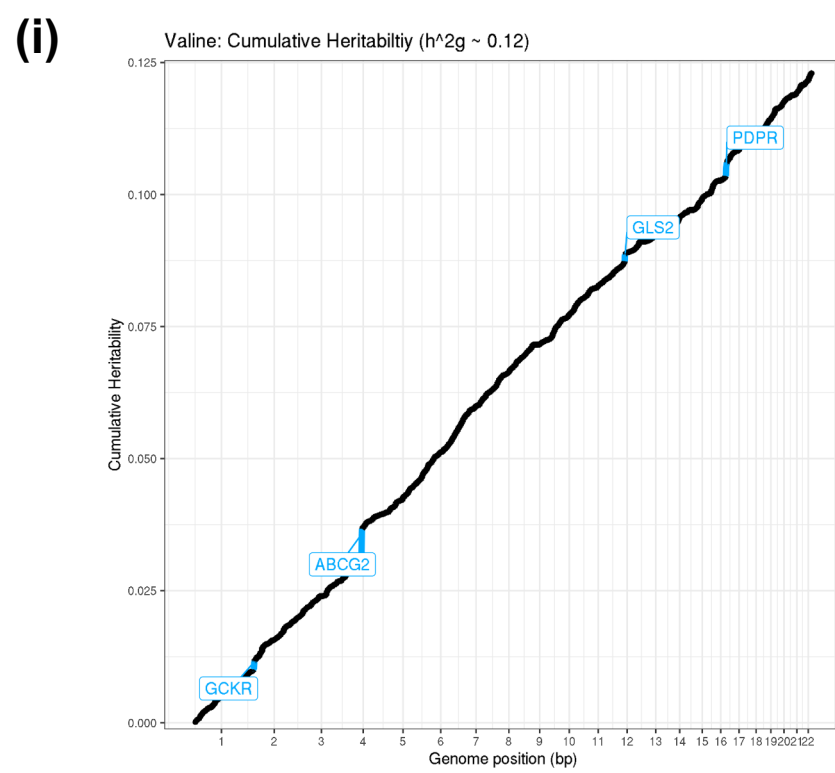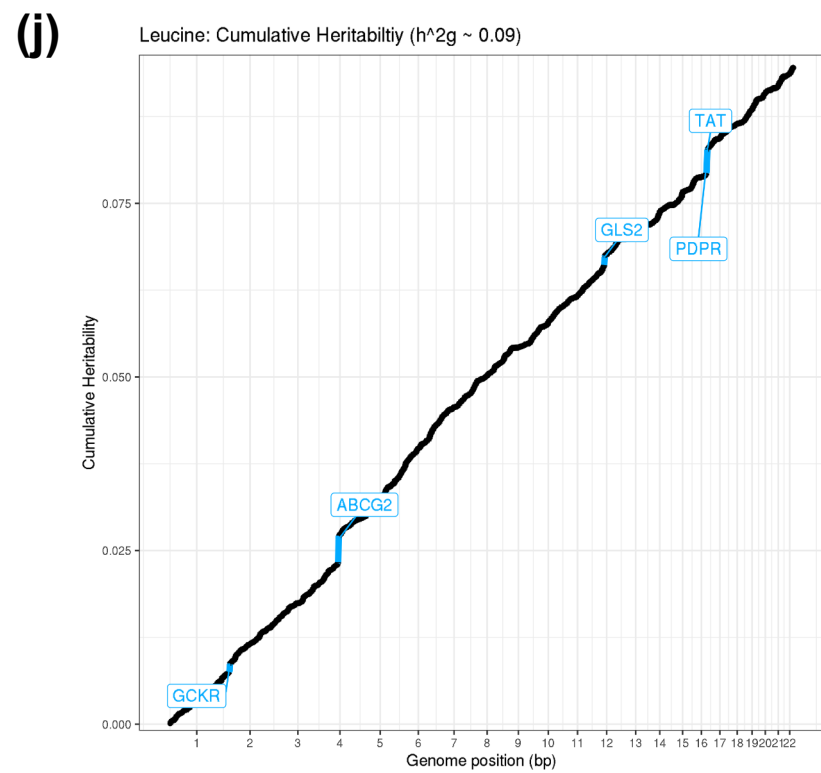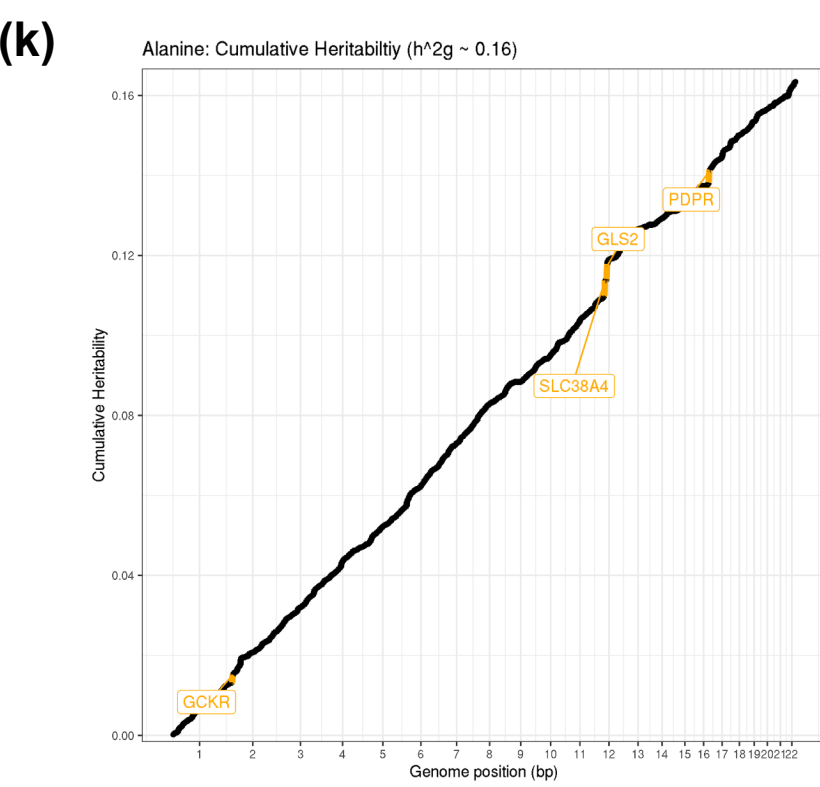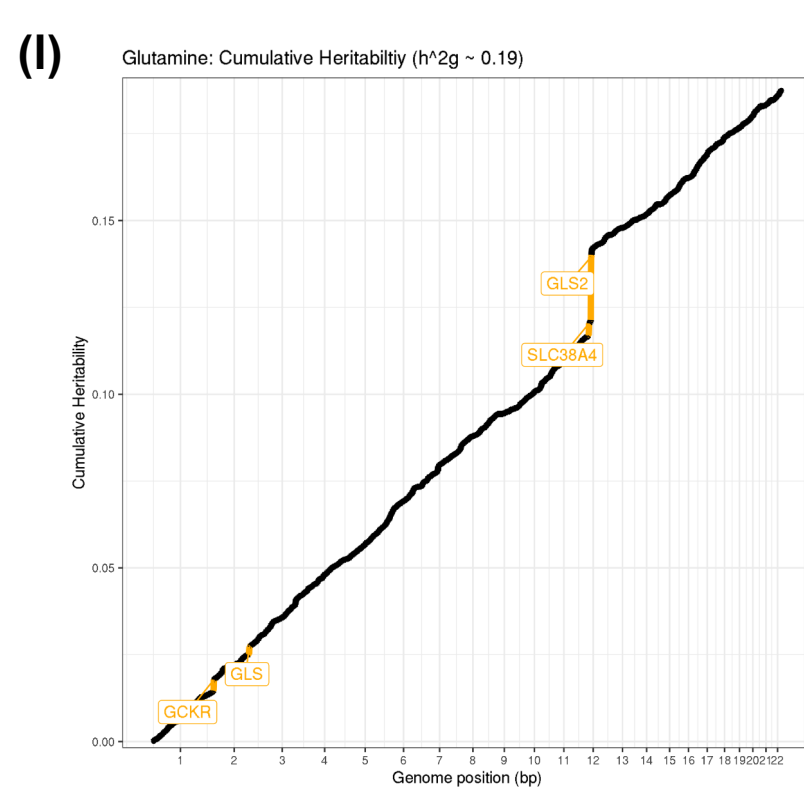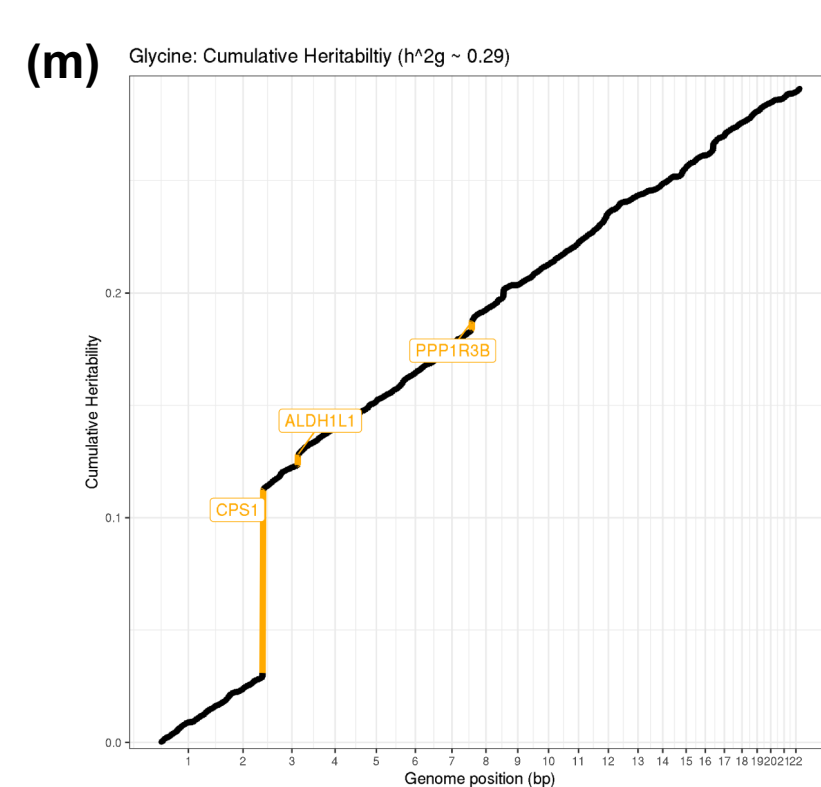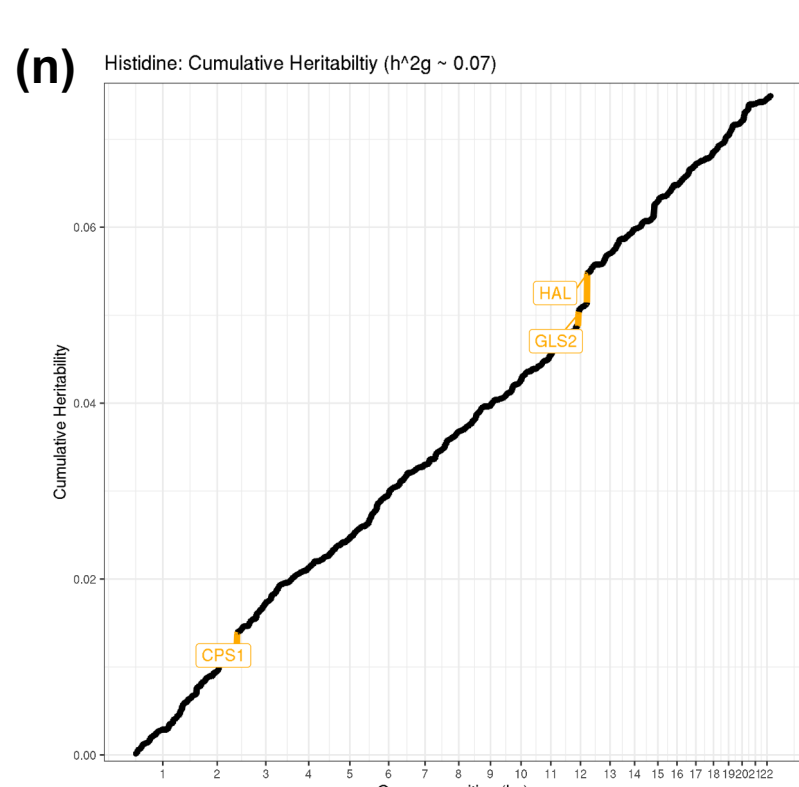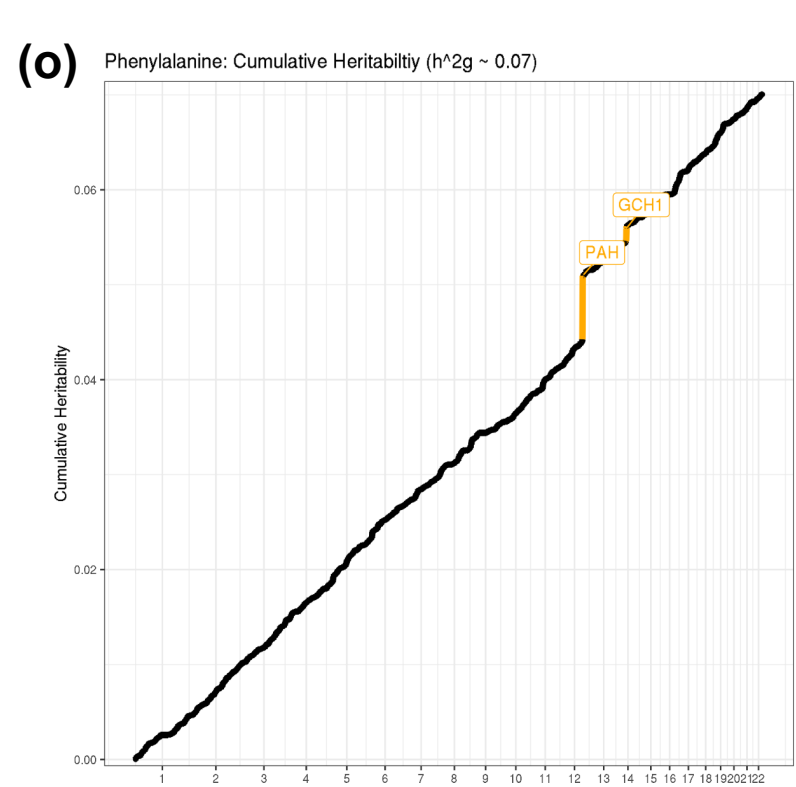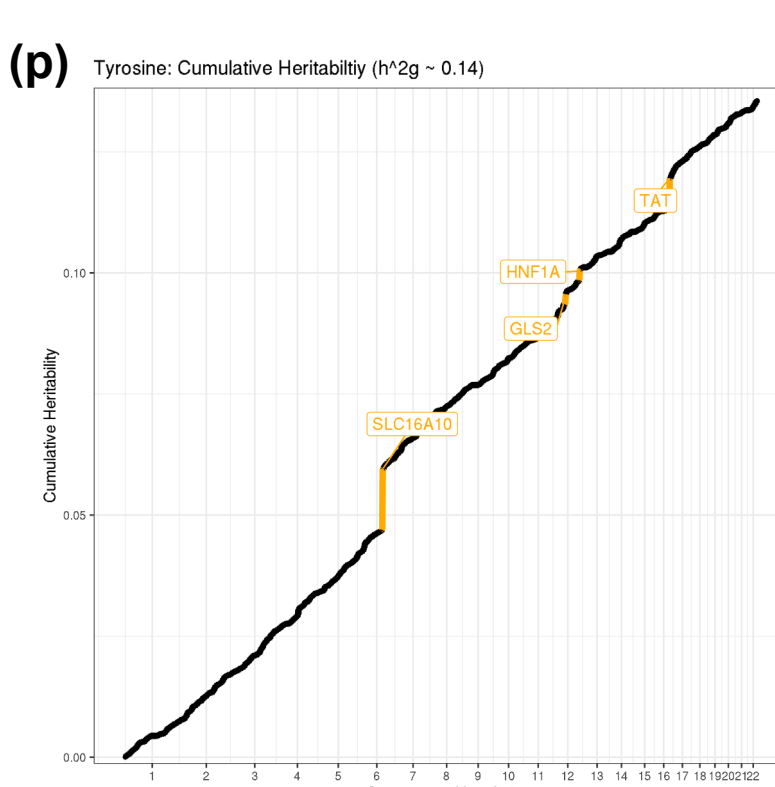

Supplement: supp [file elife-79348-supp-v1.zip]

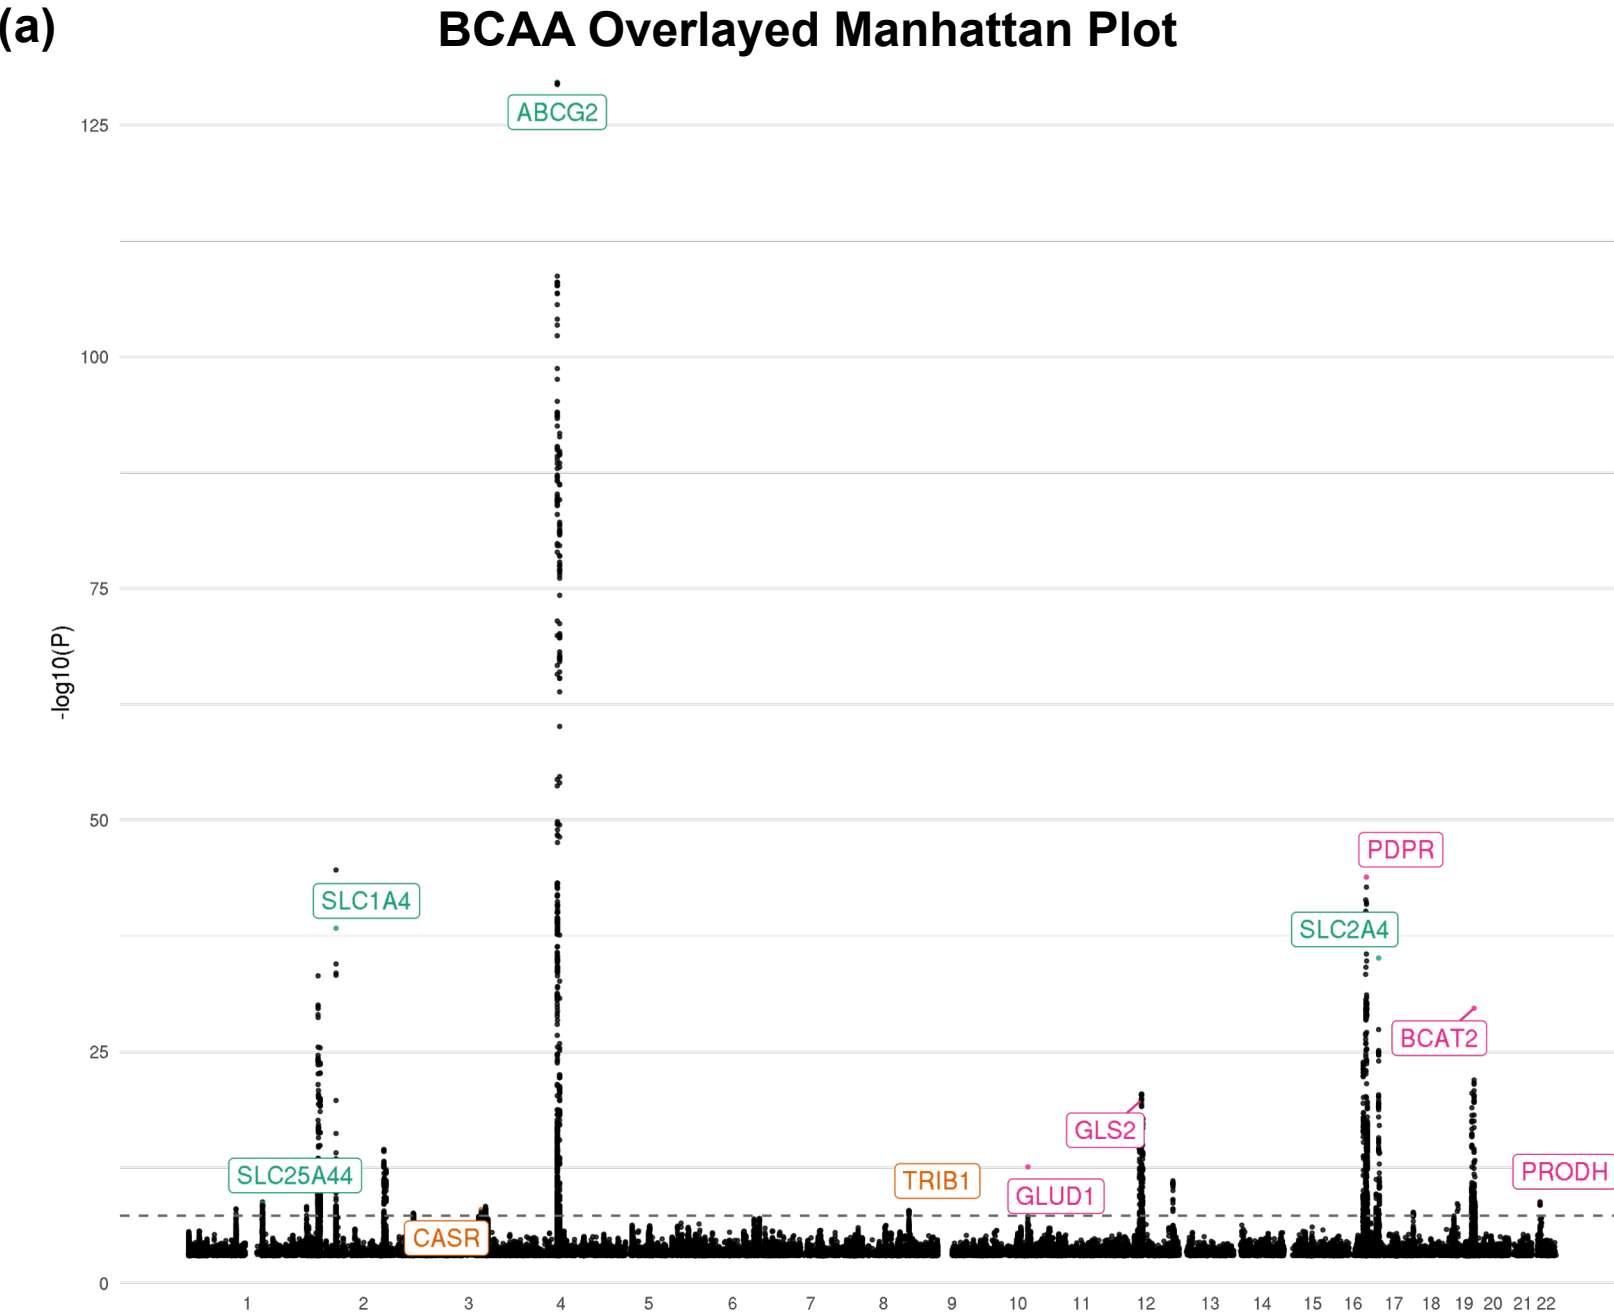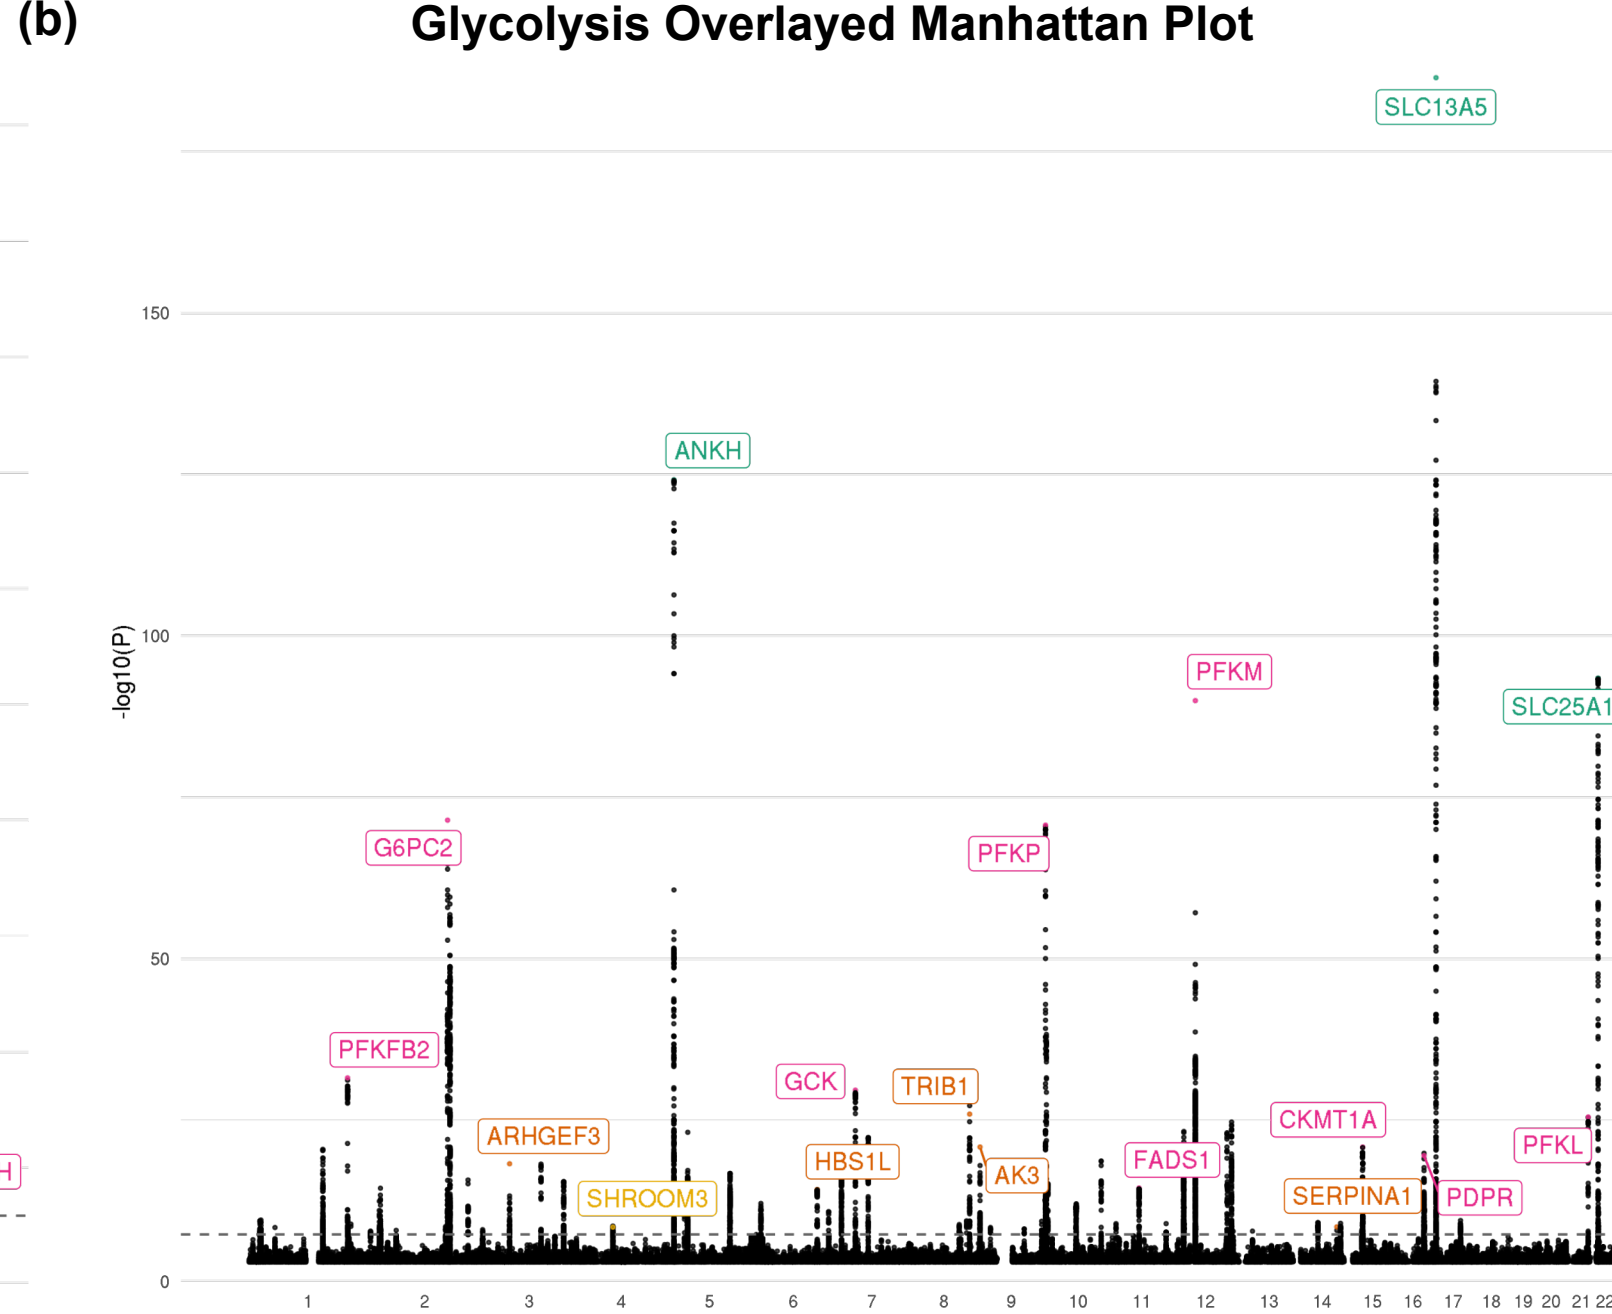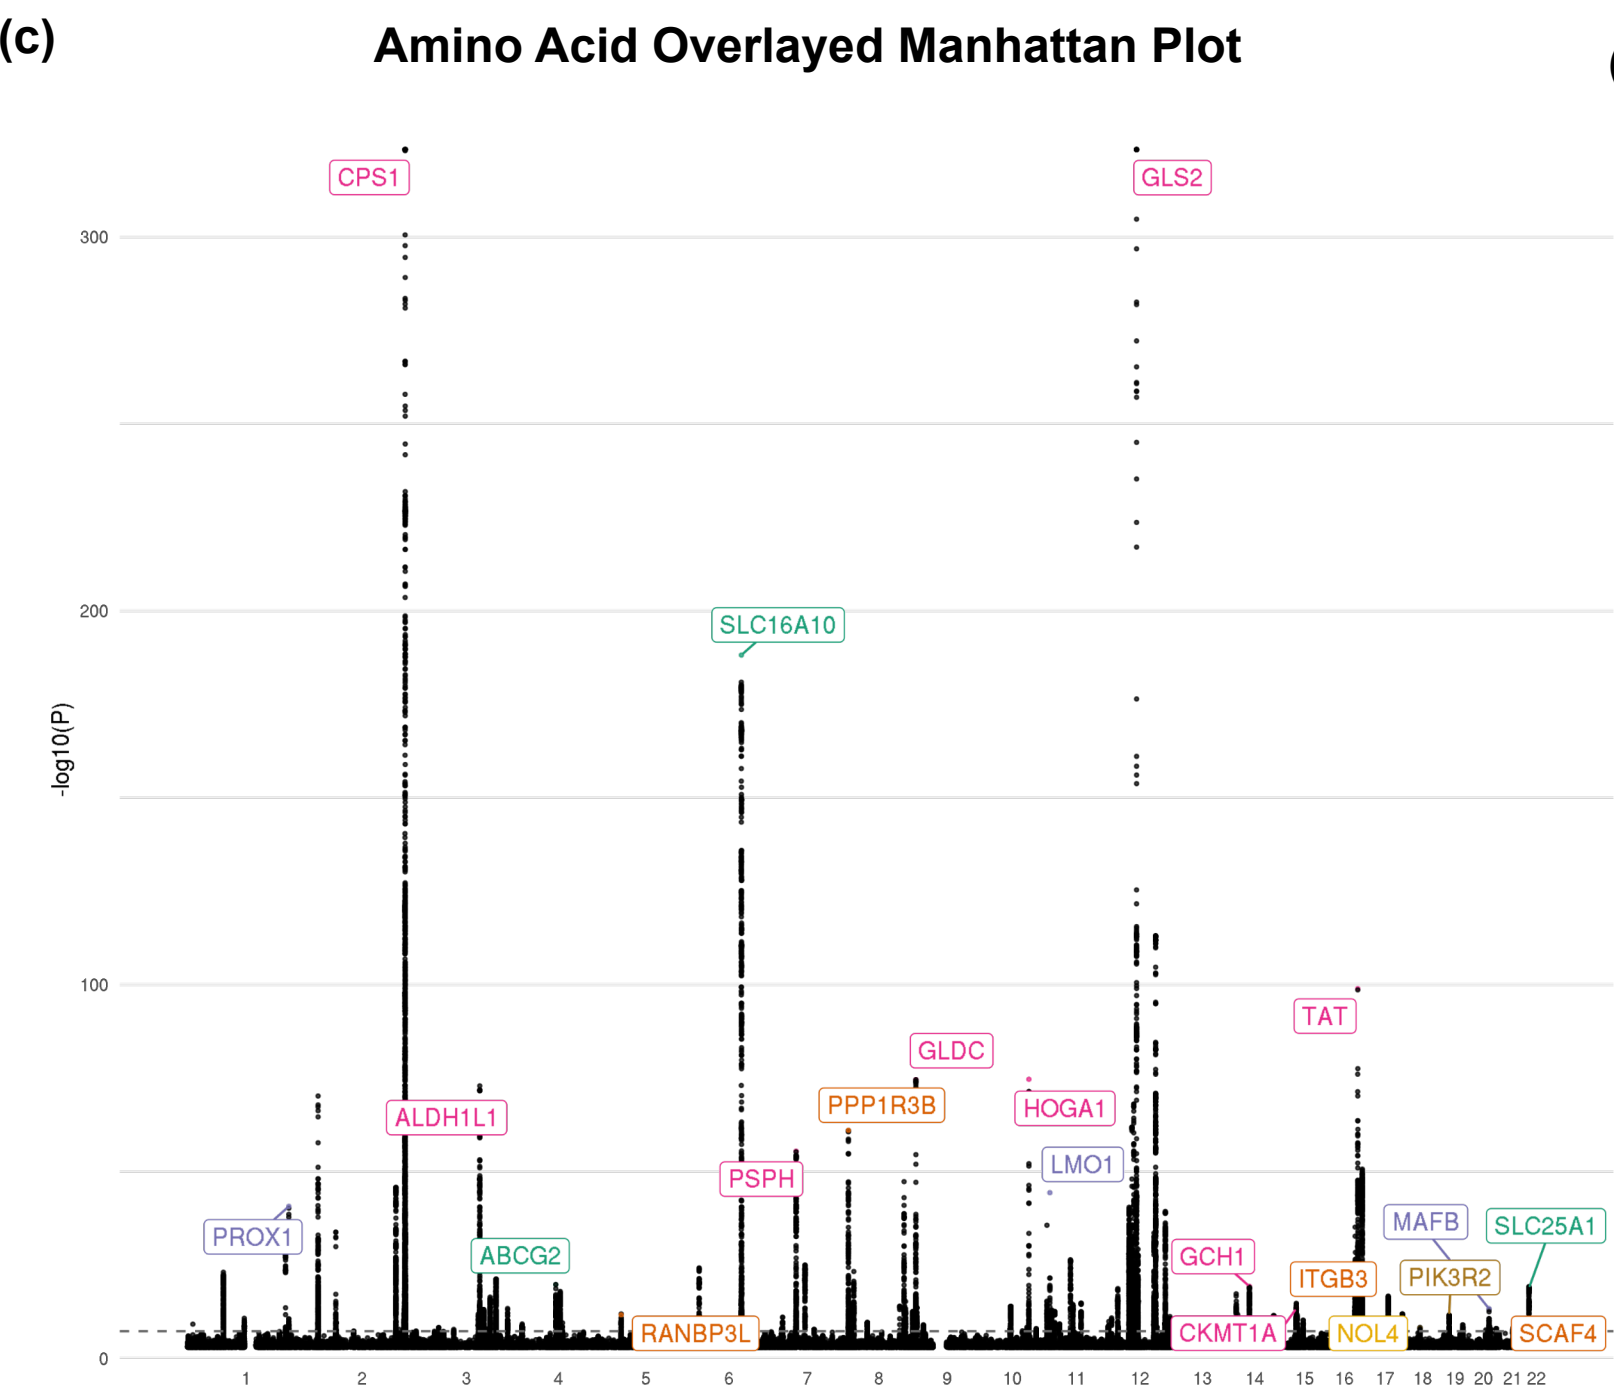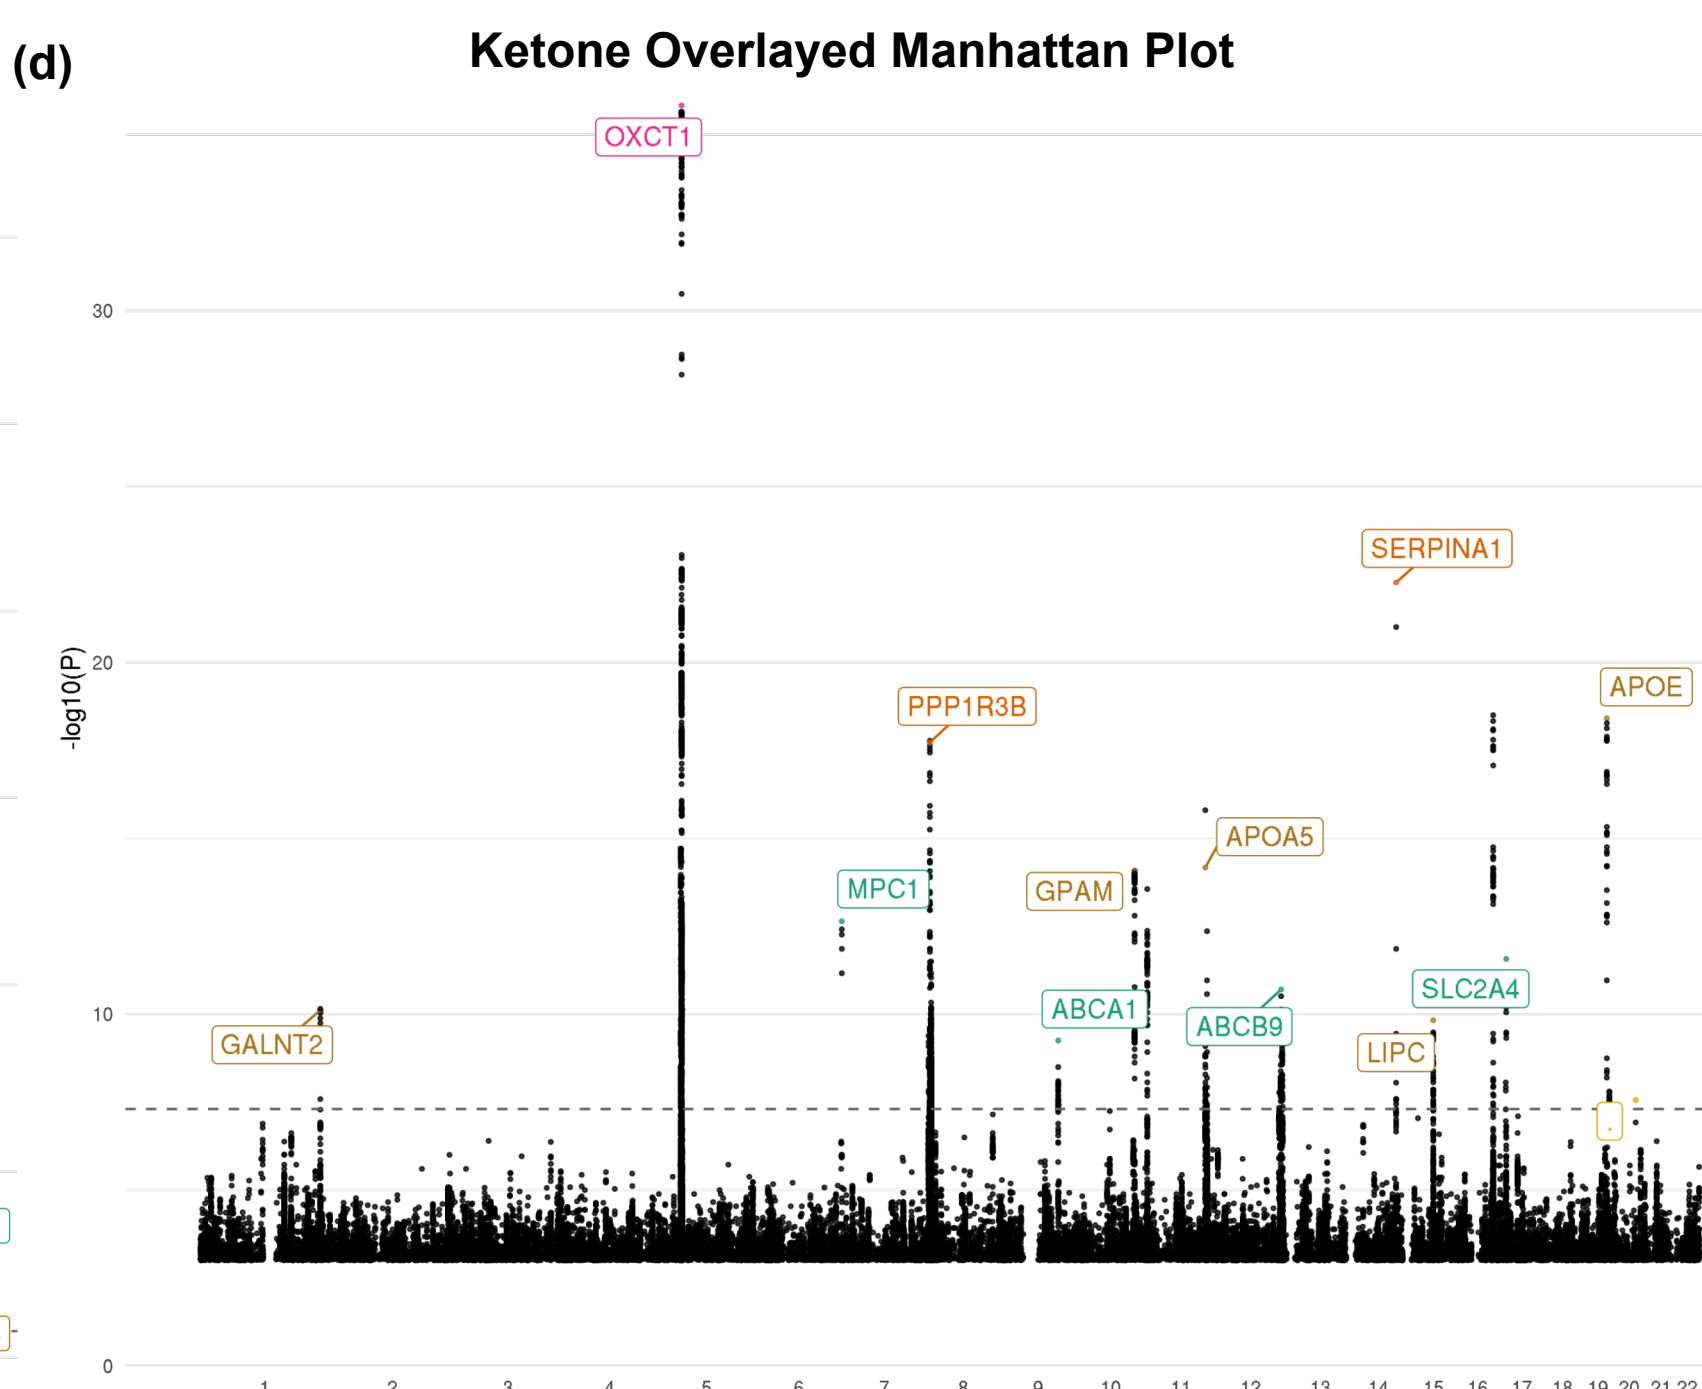

Supplement: supp [file elife-79348-supp-v1.zip]

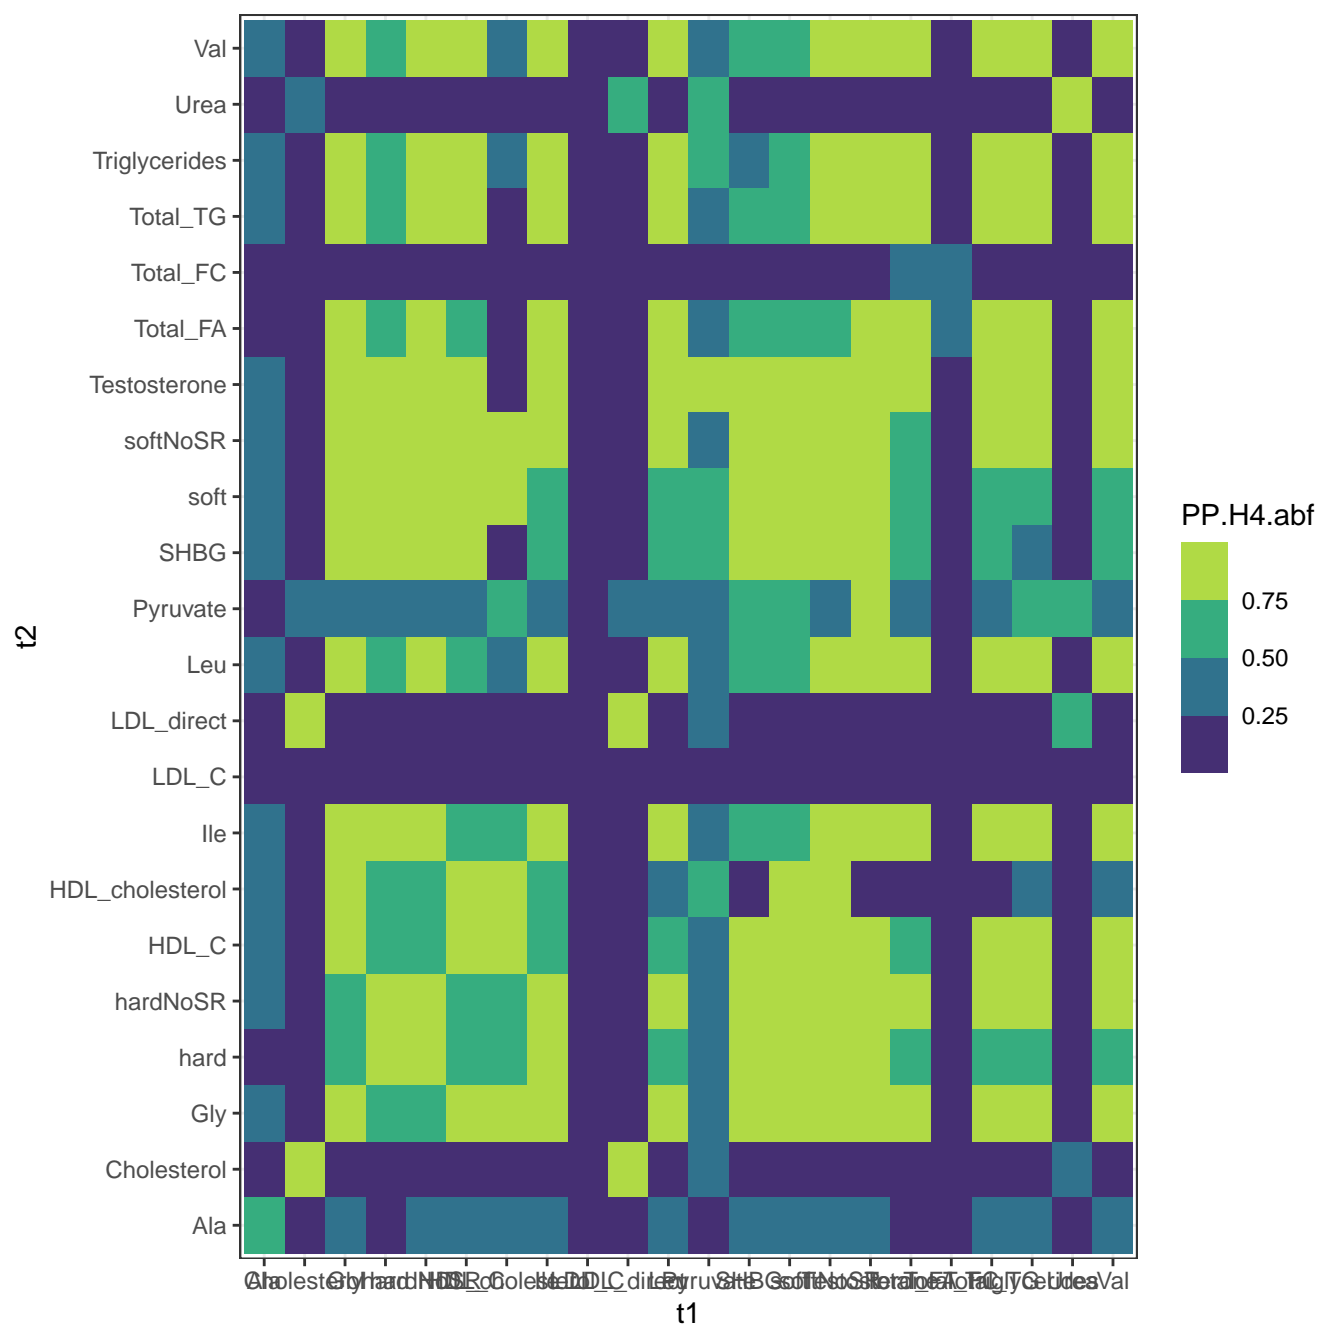

Supplement: supp [file elife-79348-supp-v1.zip]

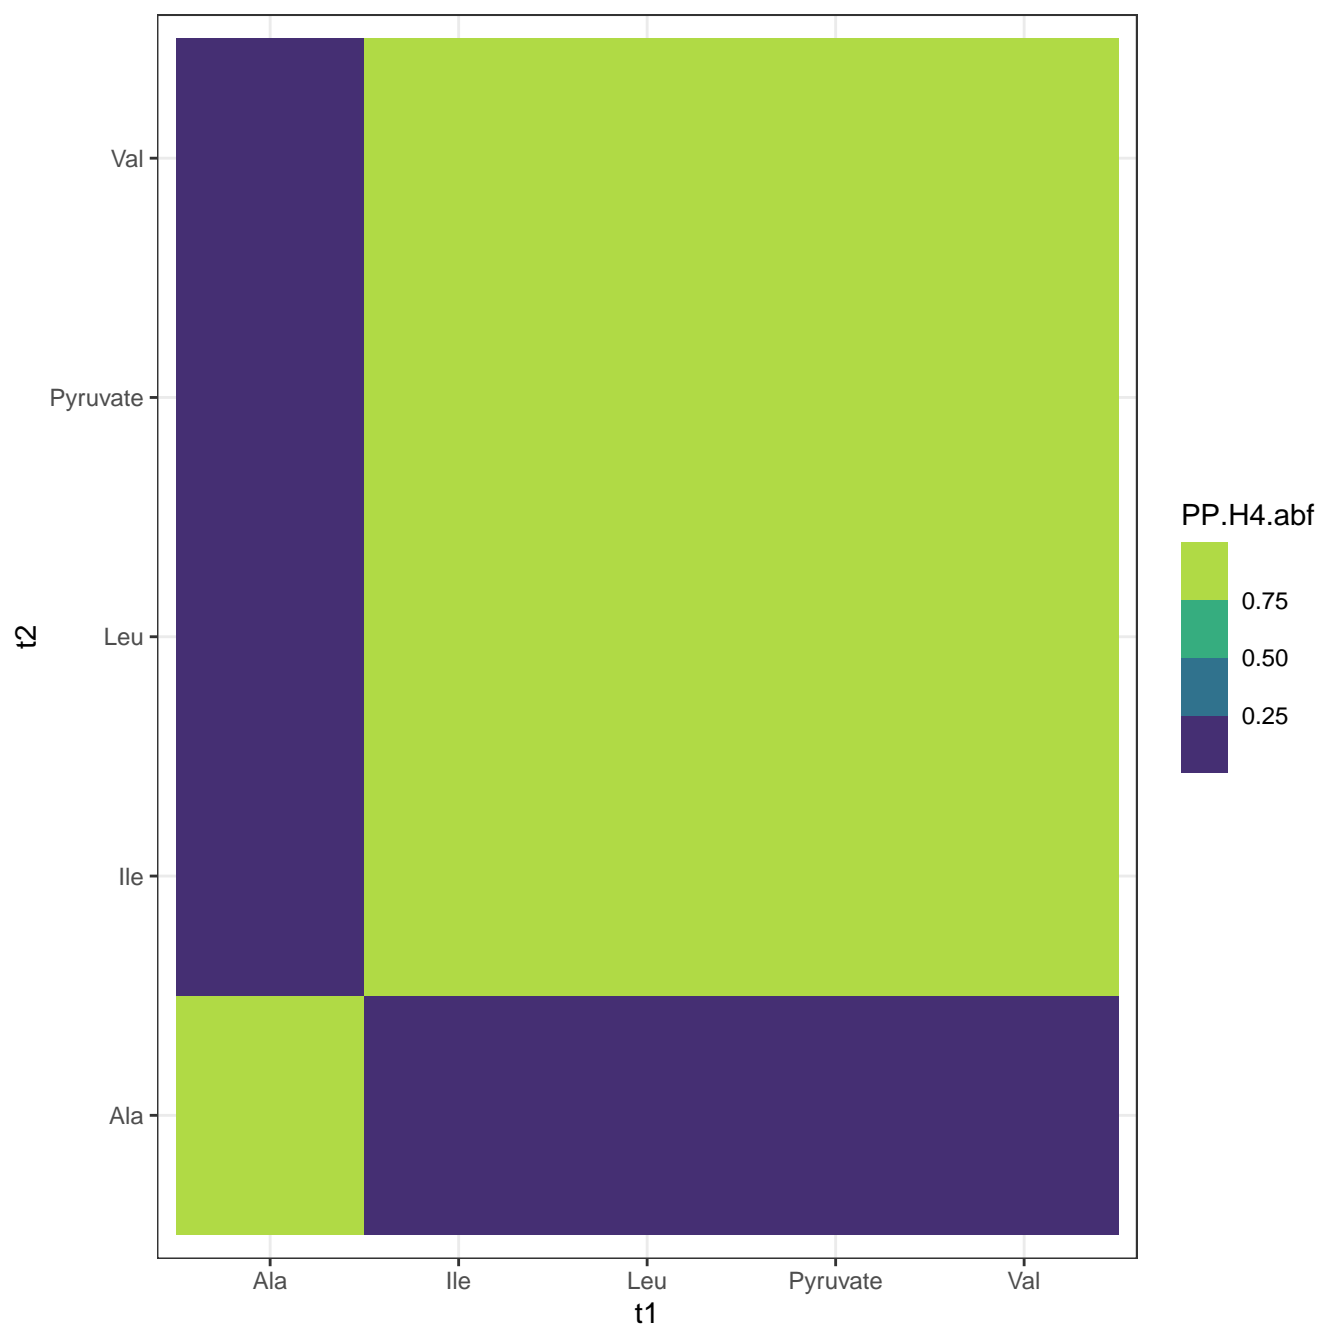

Supplement: supp [file elife-79348-supp-v1.zip]

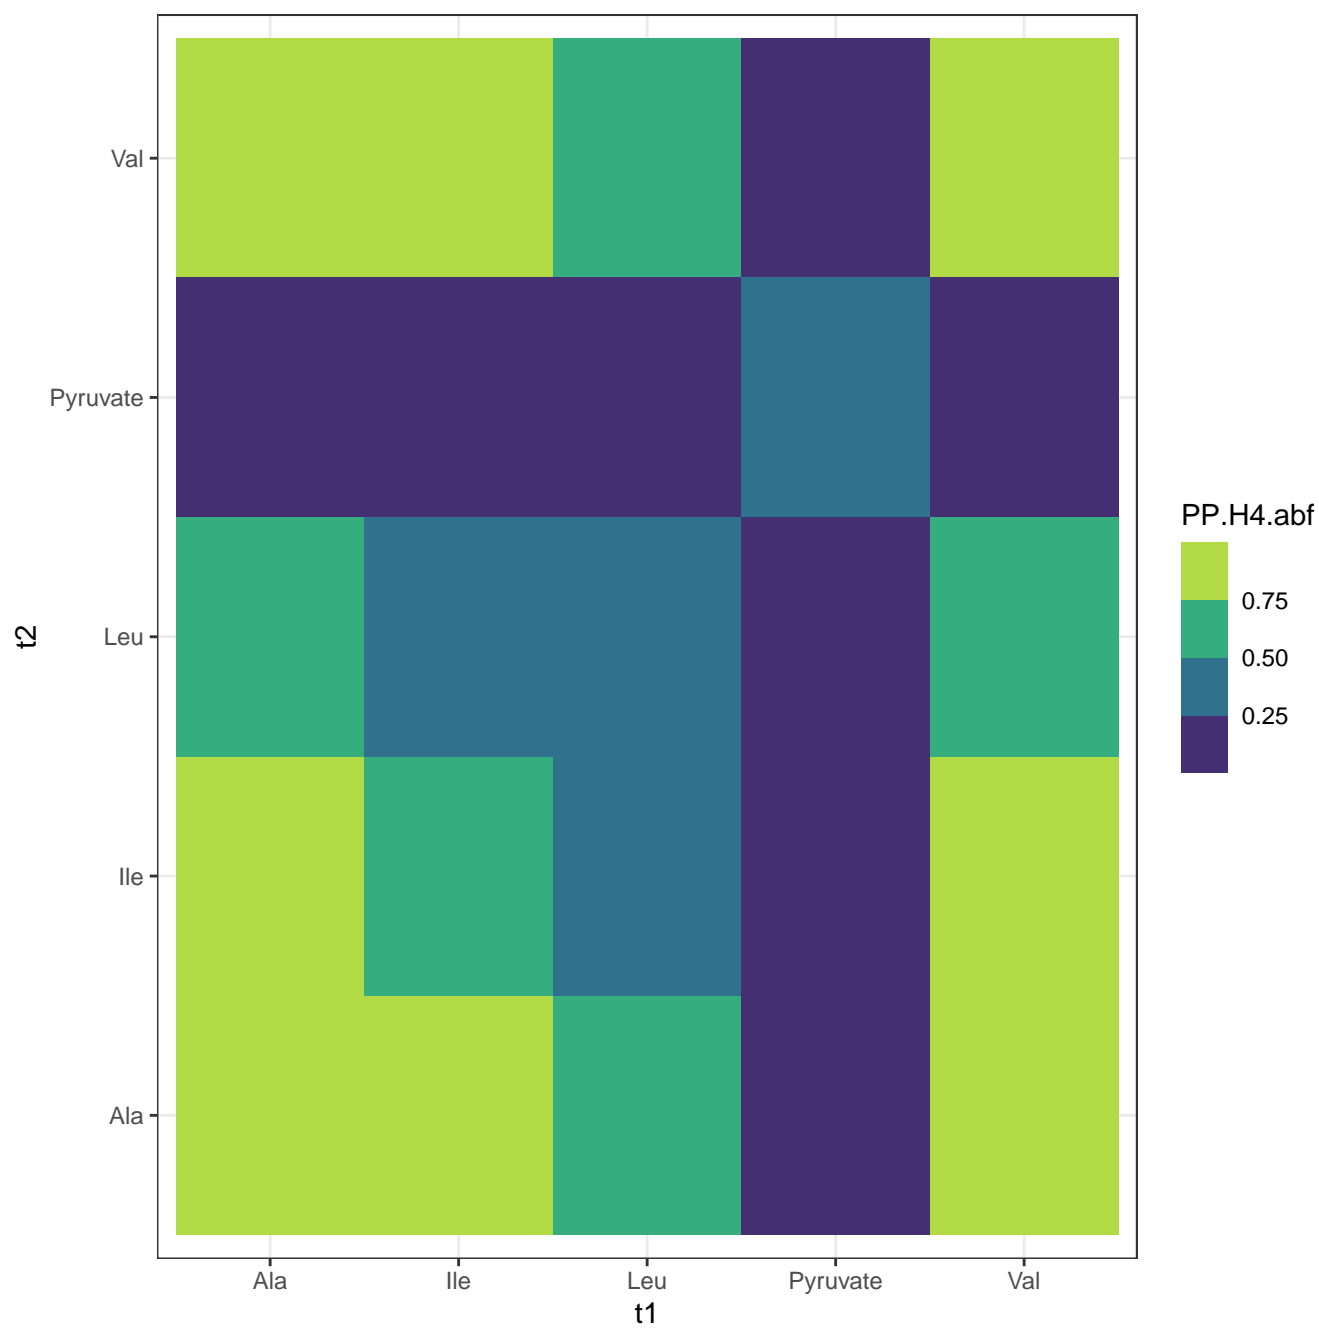

Supplement: supp [file elife-79348-supp-v1.zip]

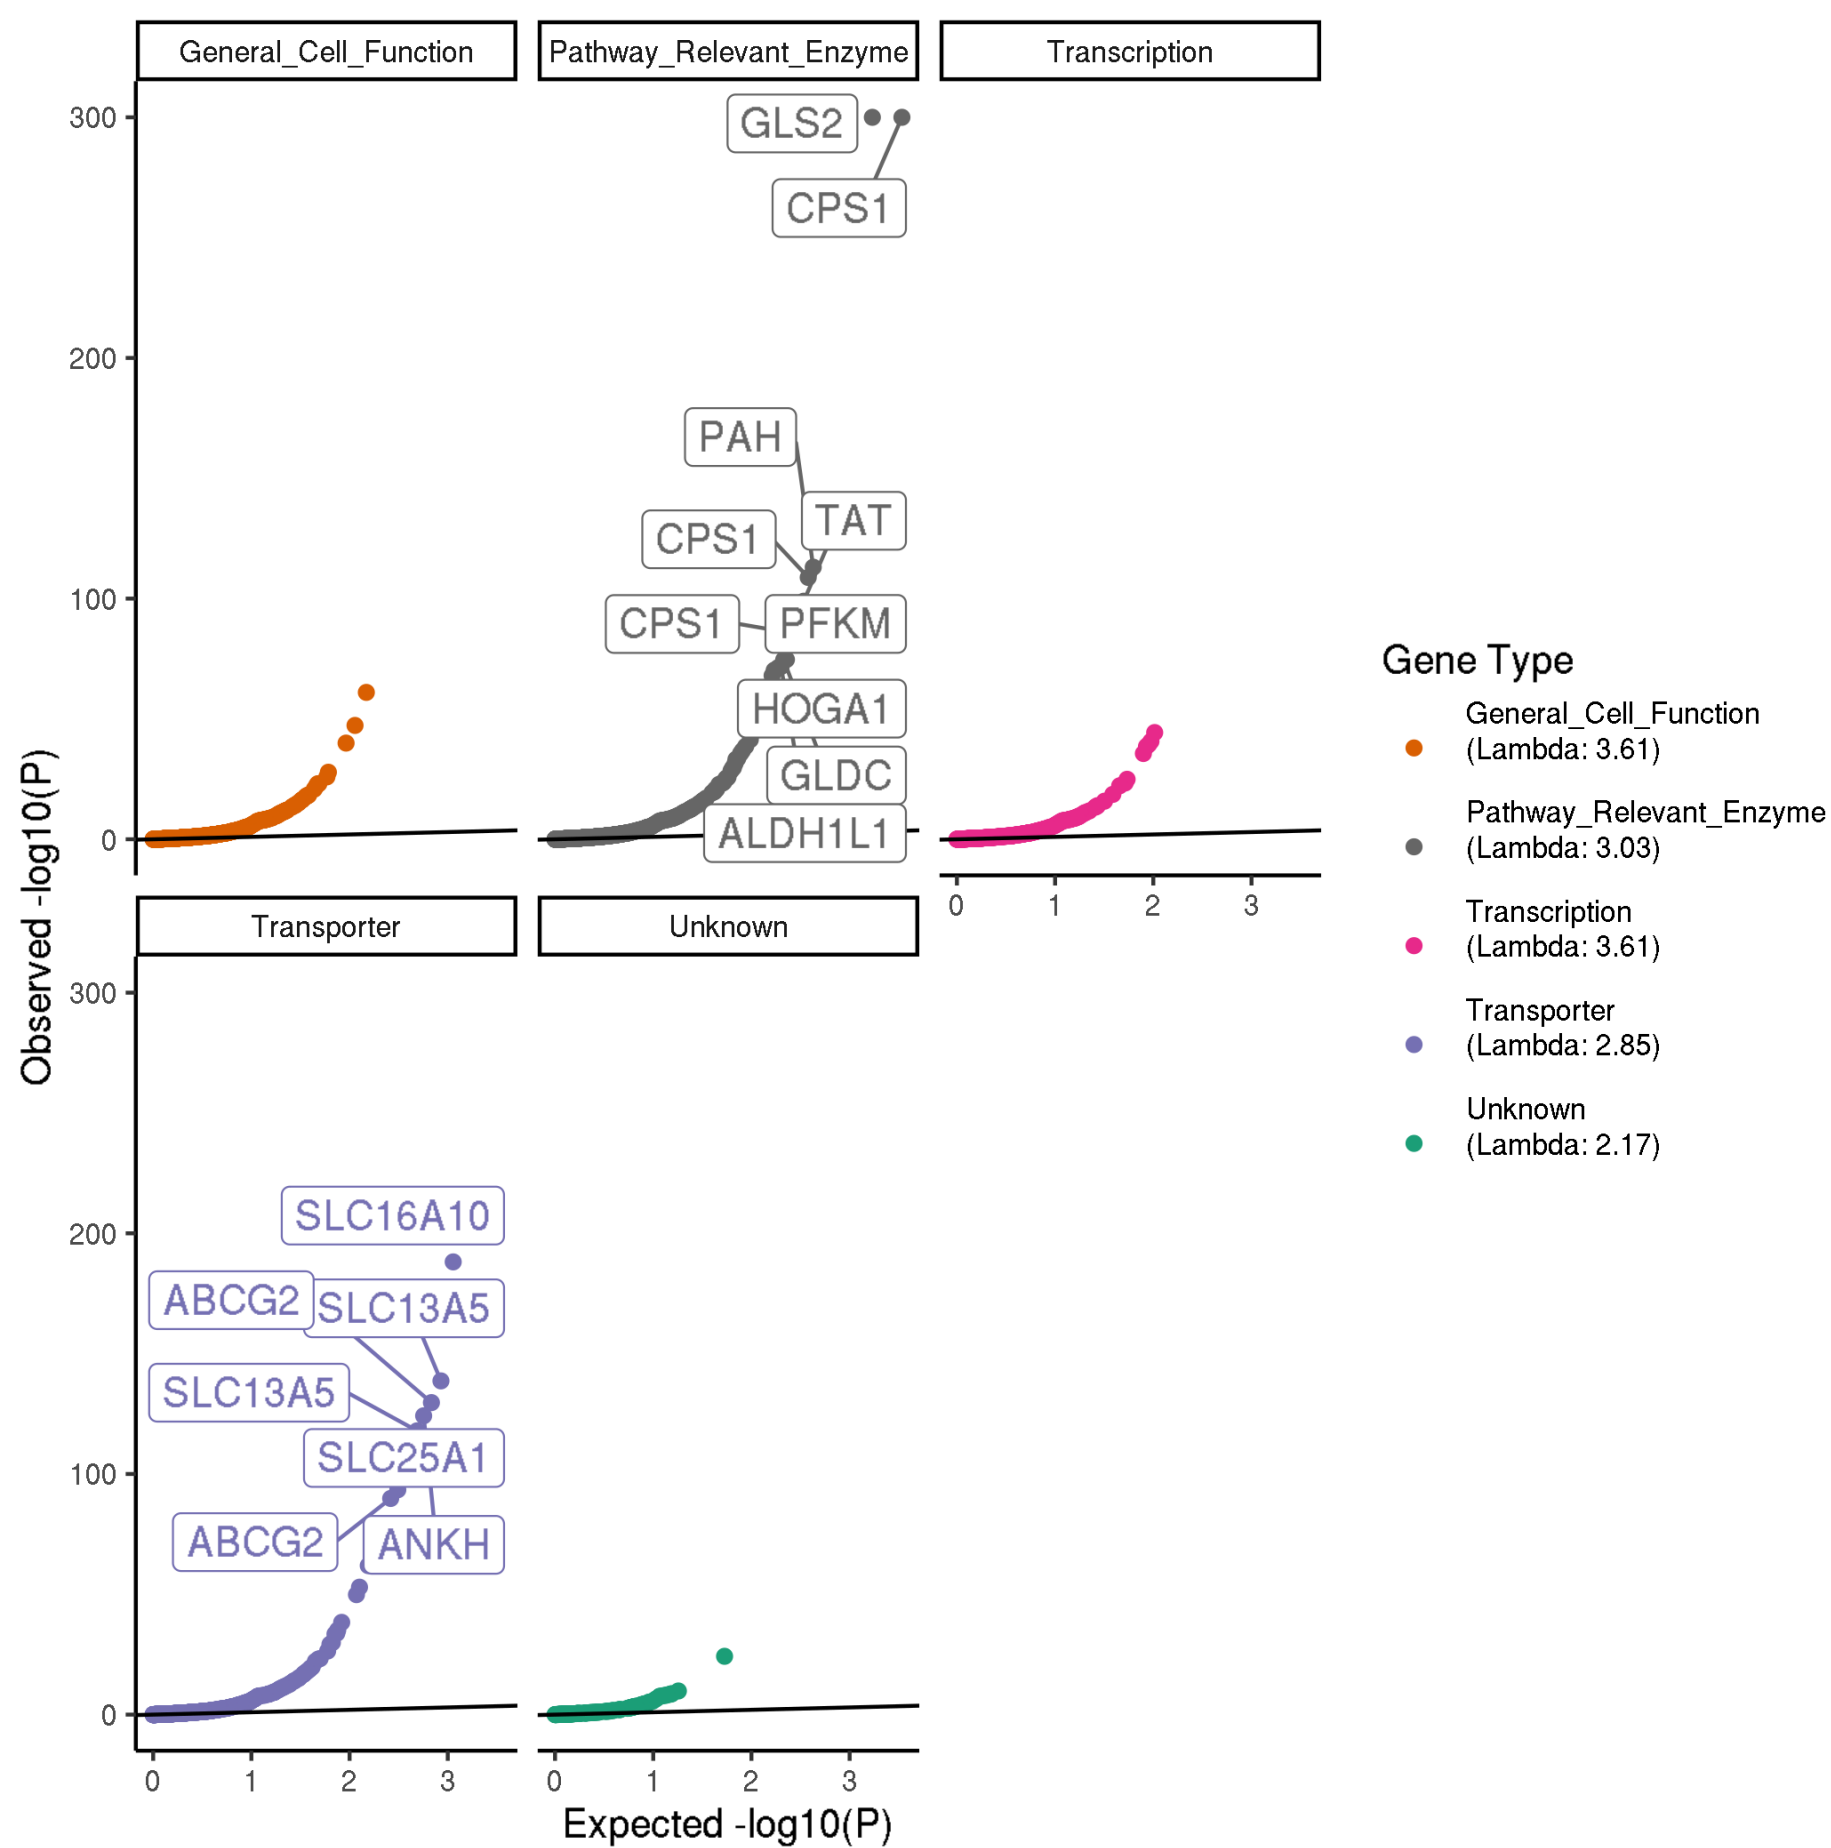

Supplement: supp [file elife-79348-supp-v1.zip]

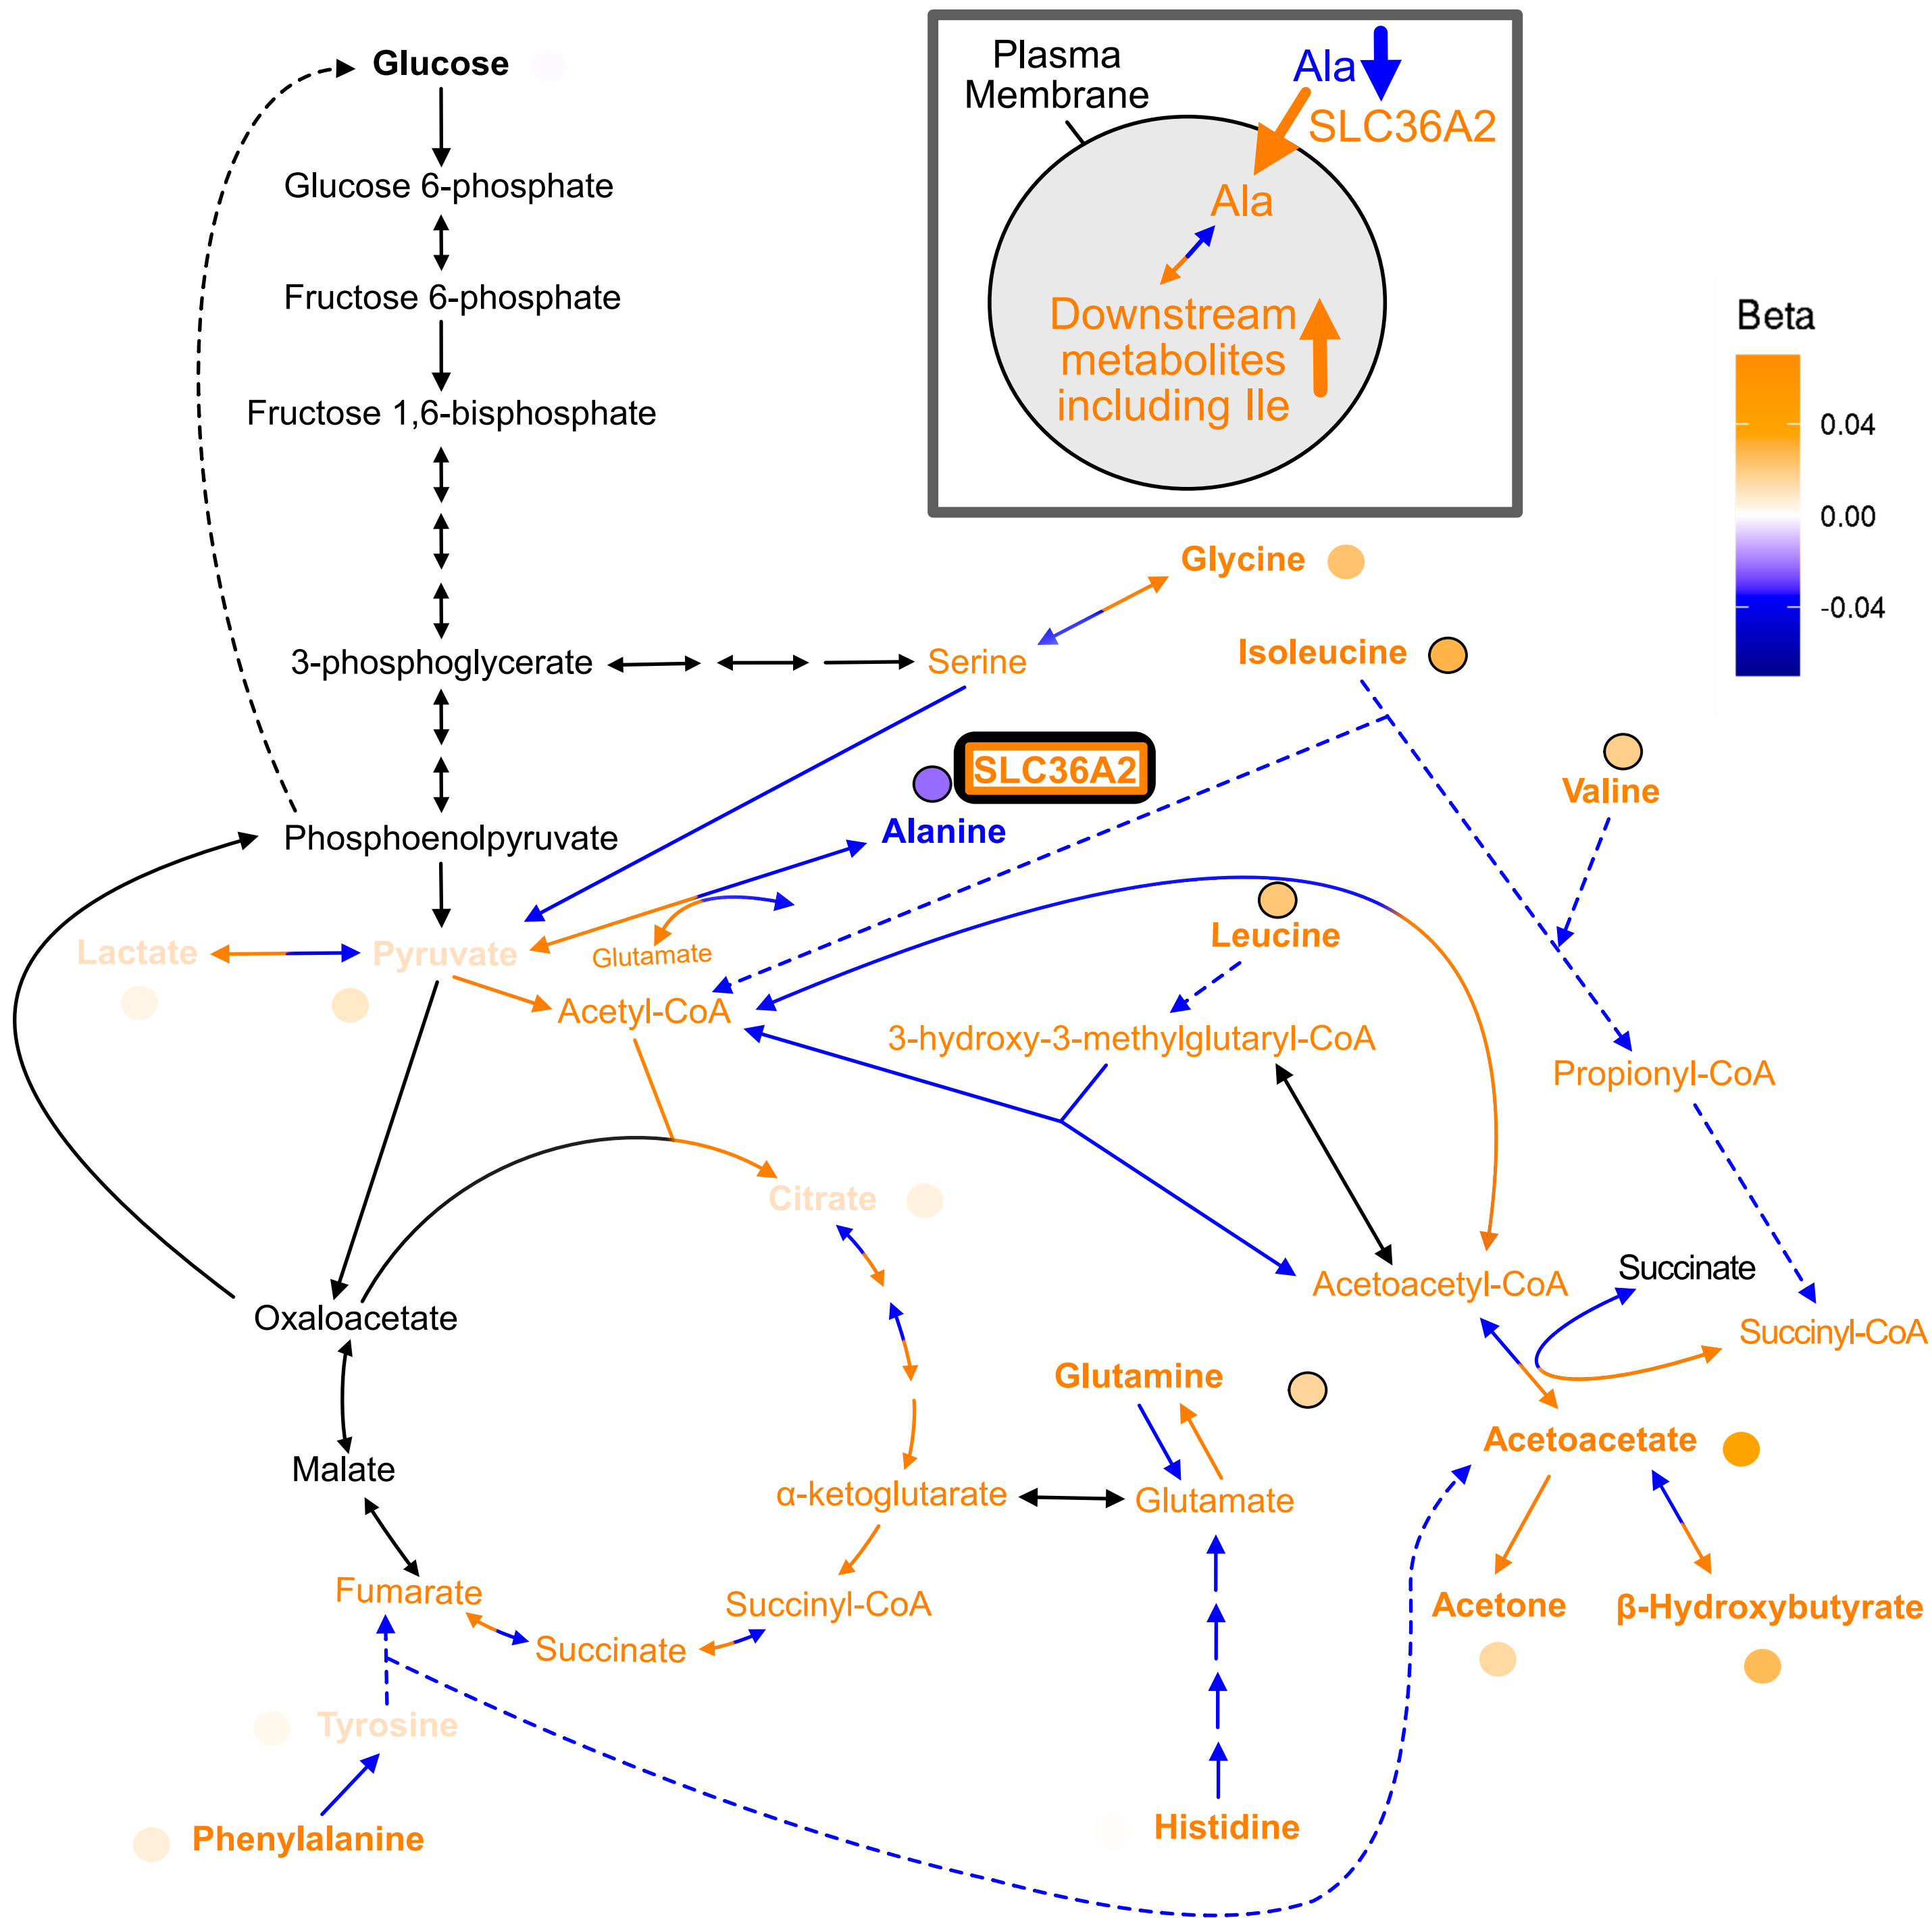

Supplement: supp [file elife-79348-supp-v1.zip]

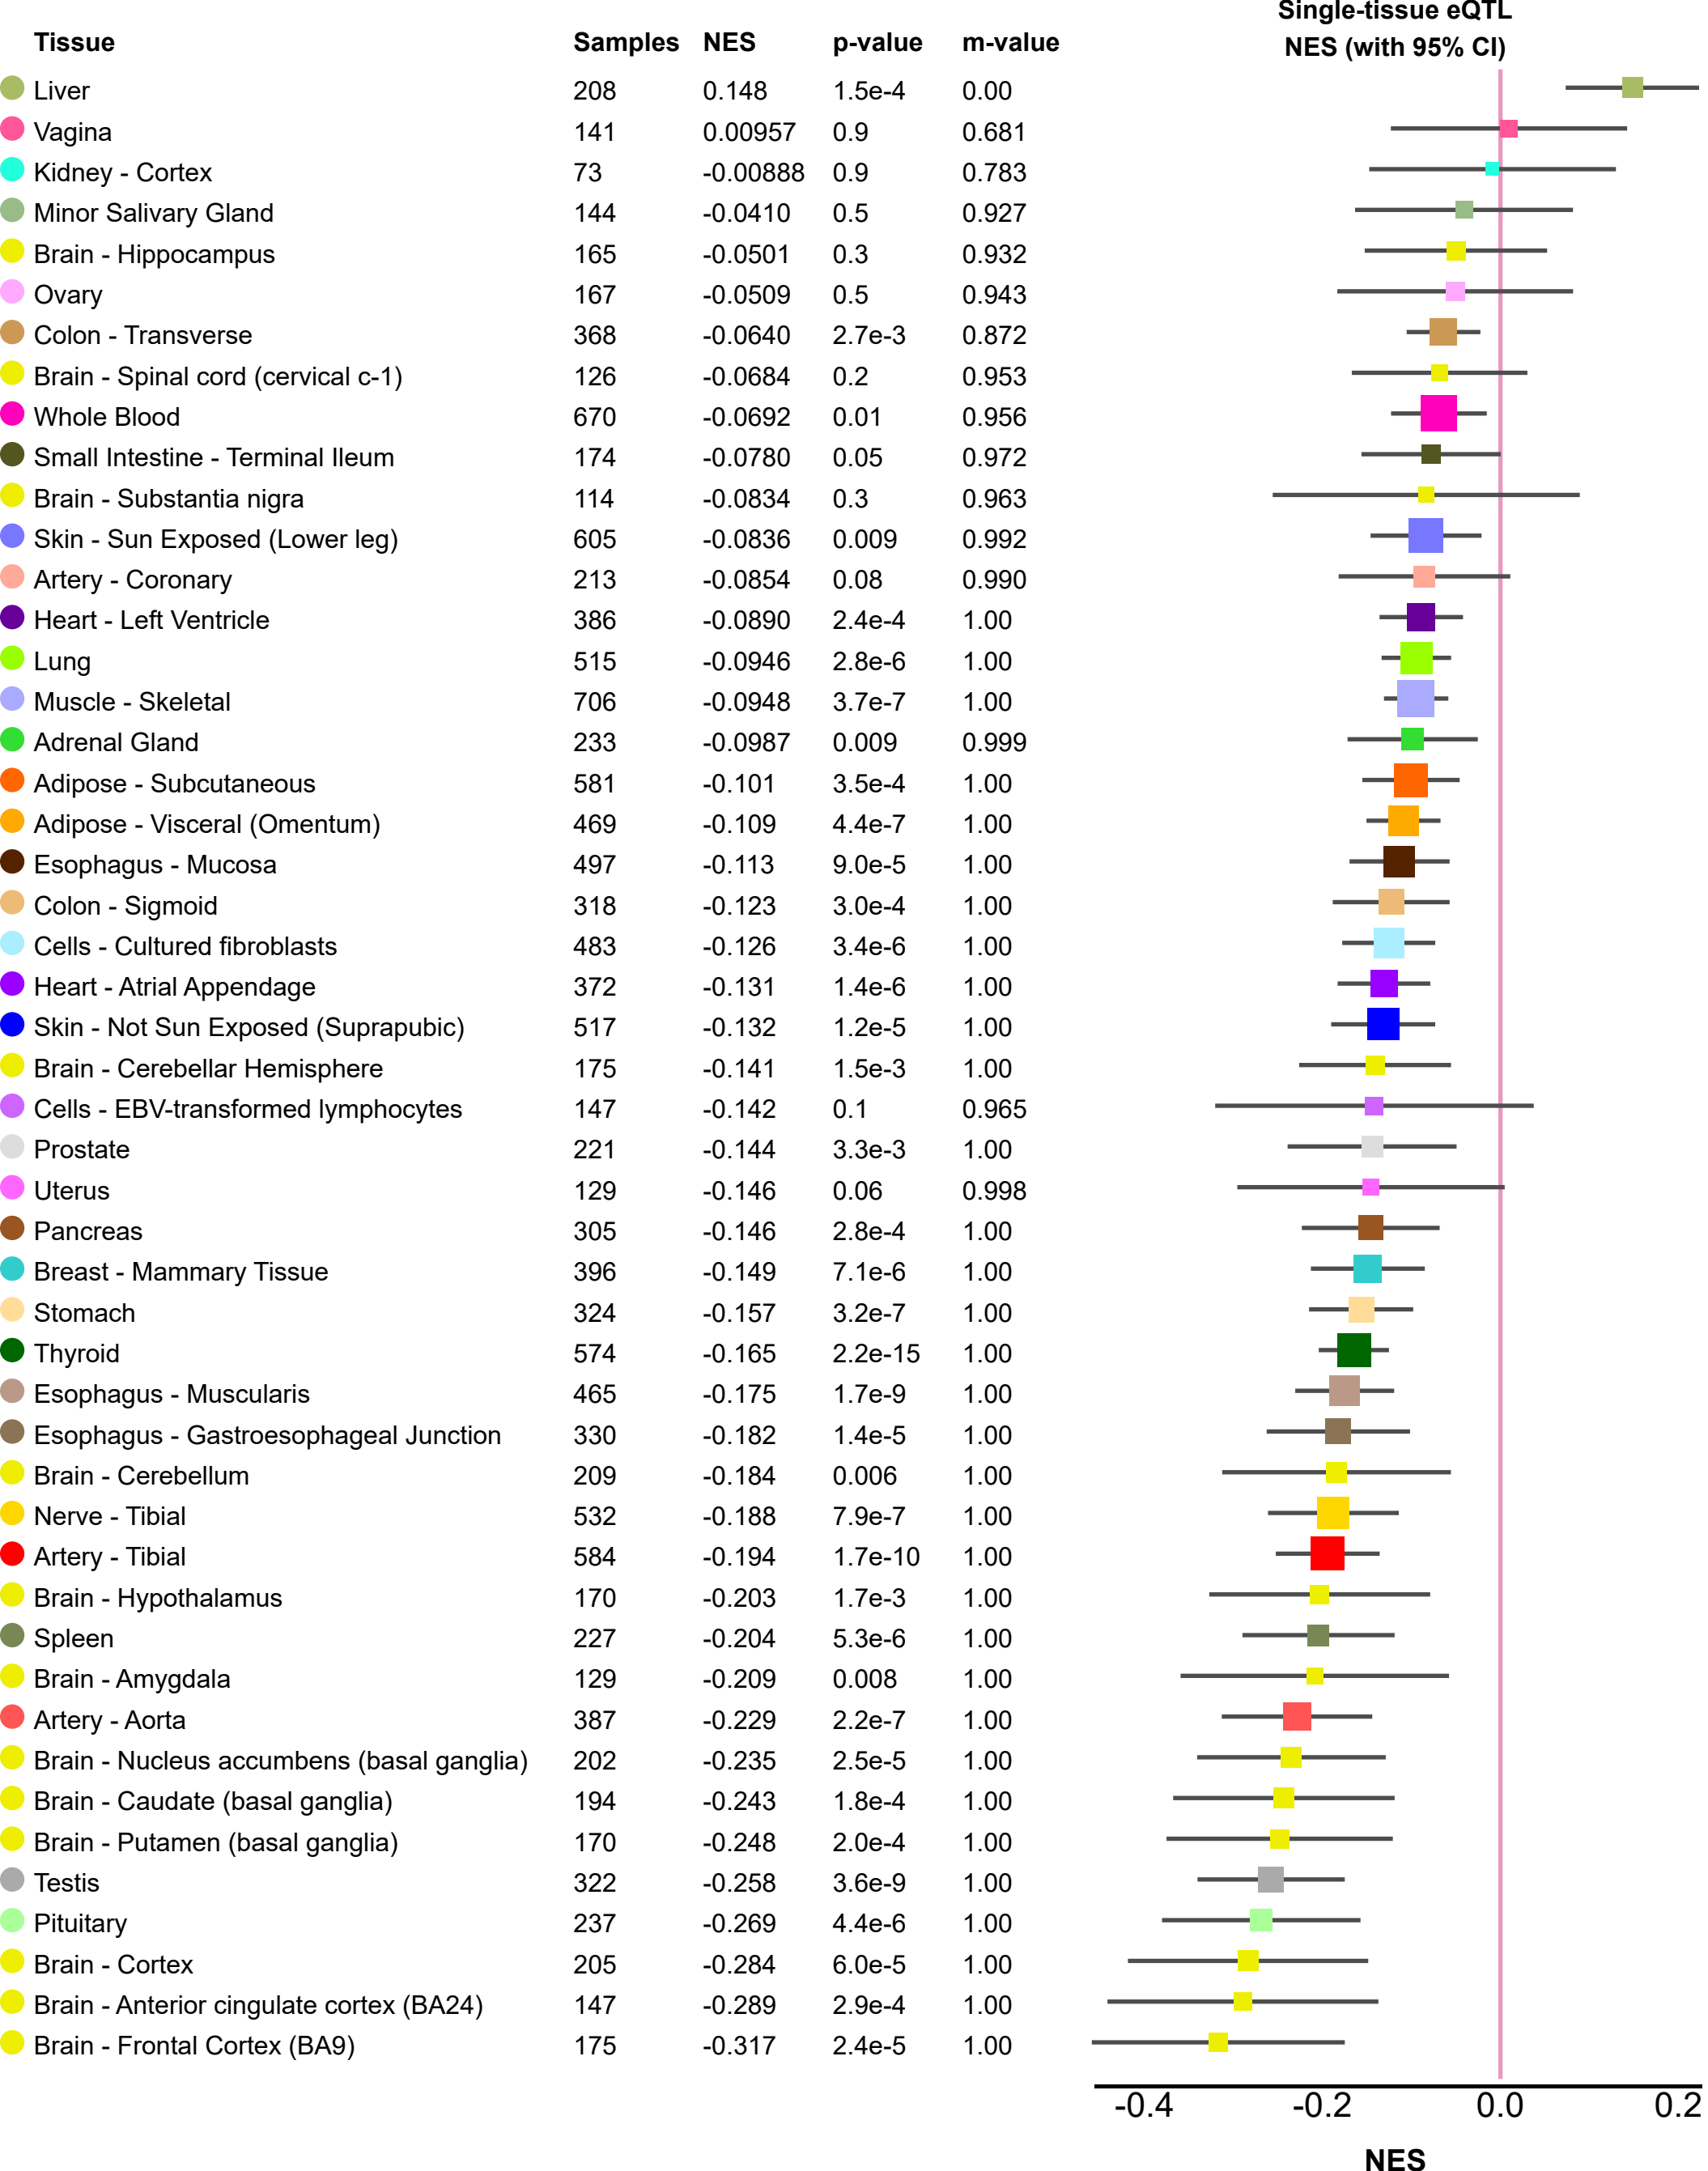

Supplement: supp [file elife-79348-supp-v1.zip]

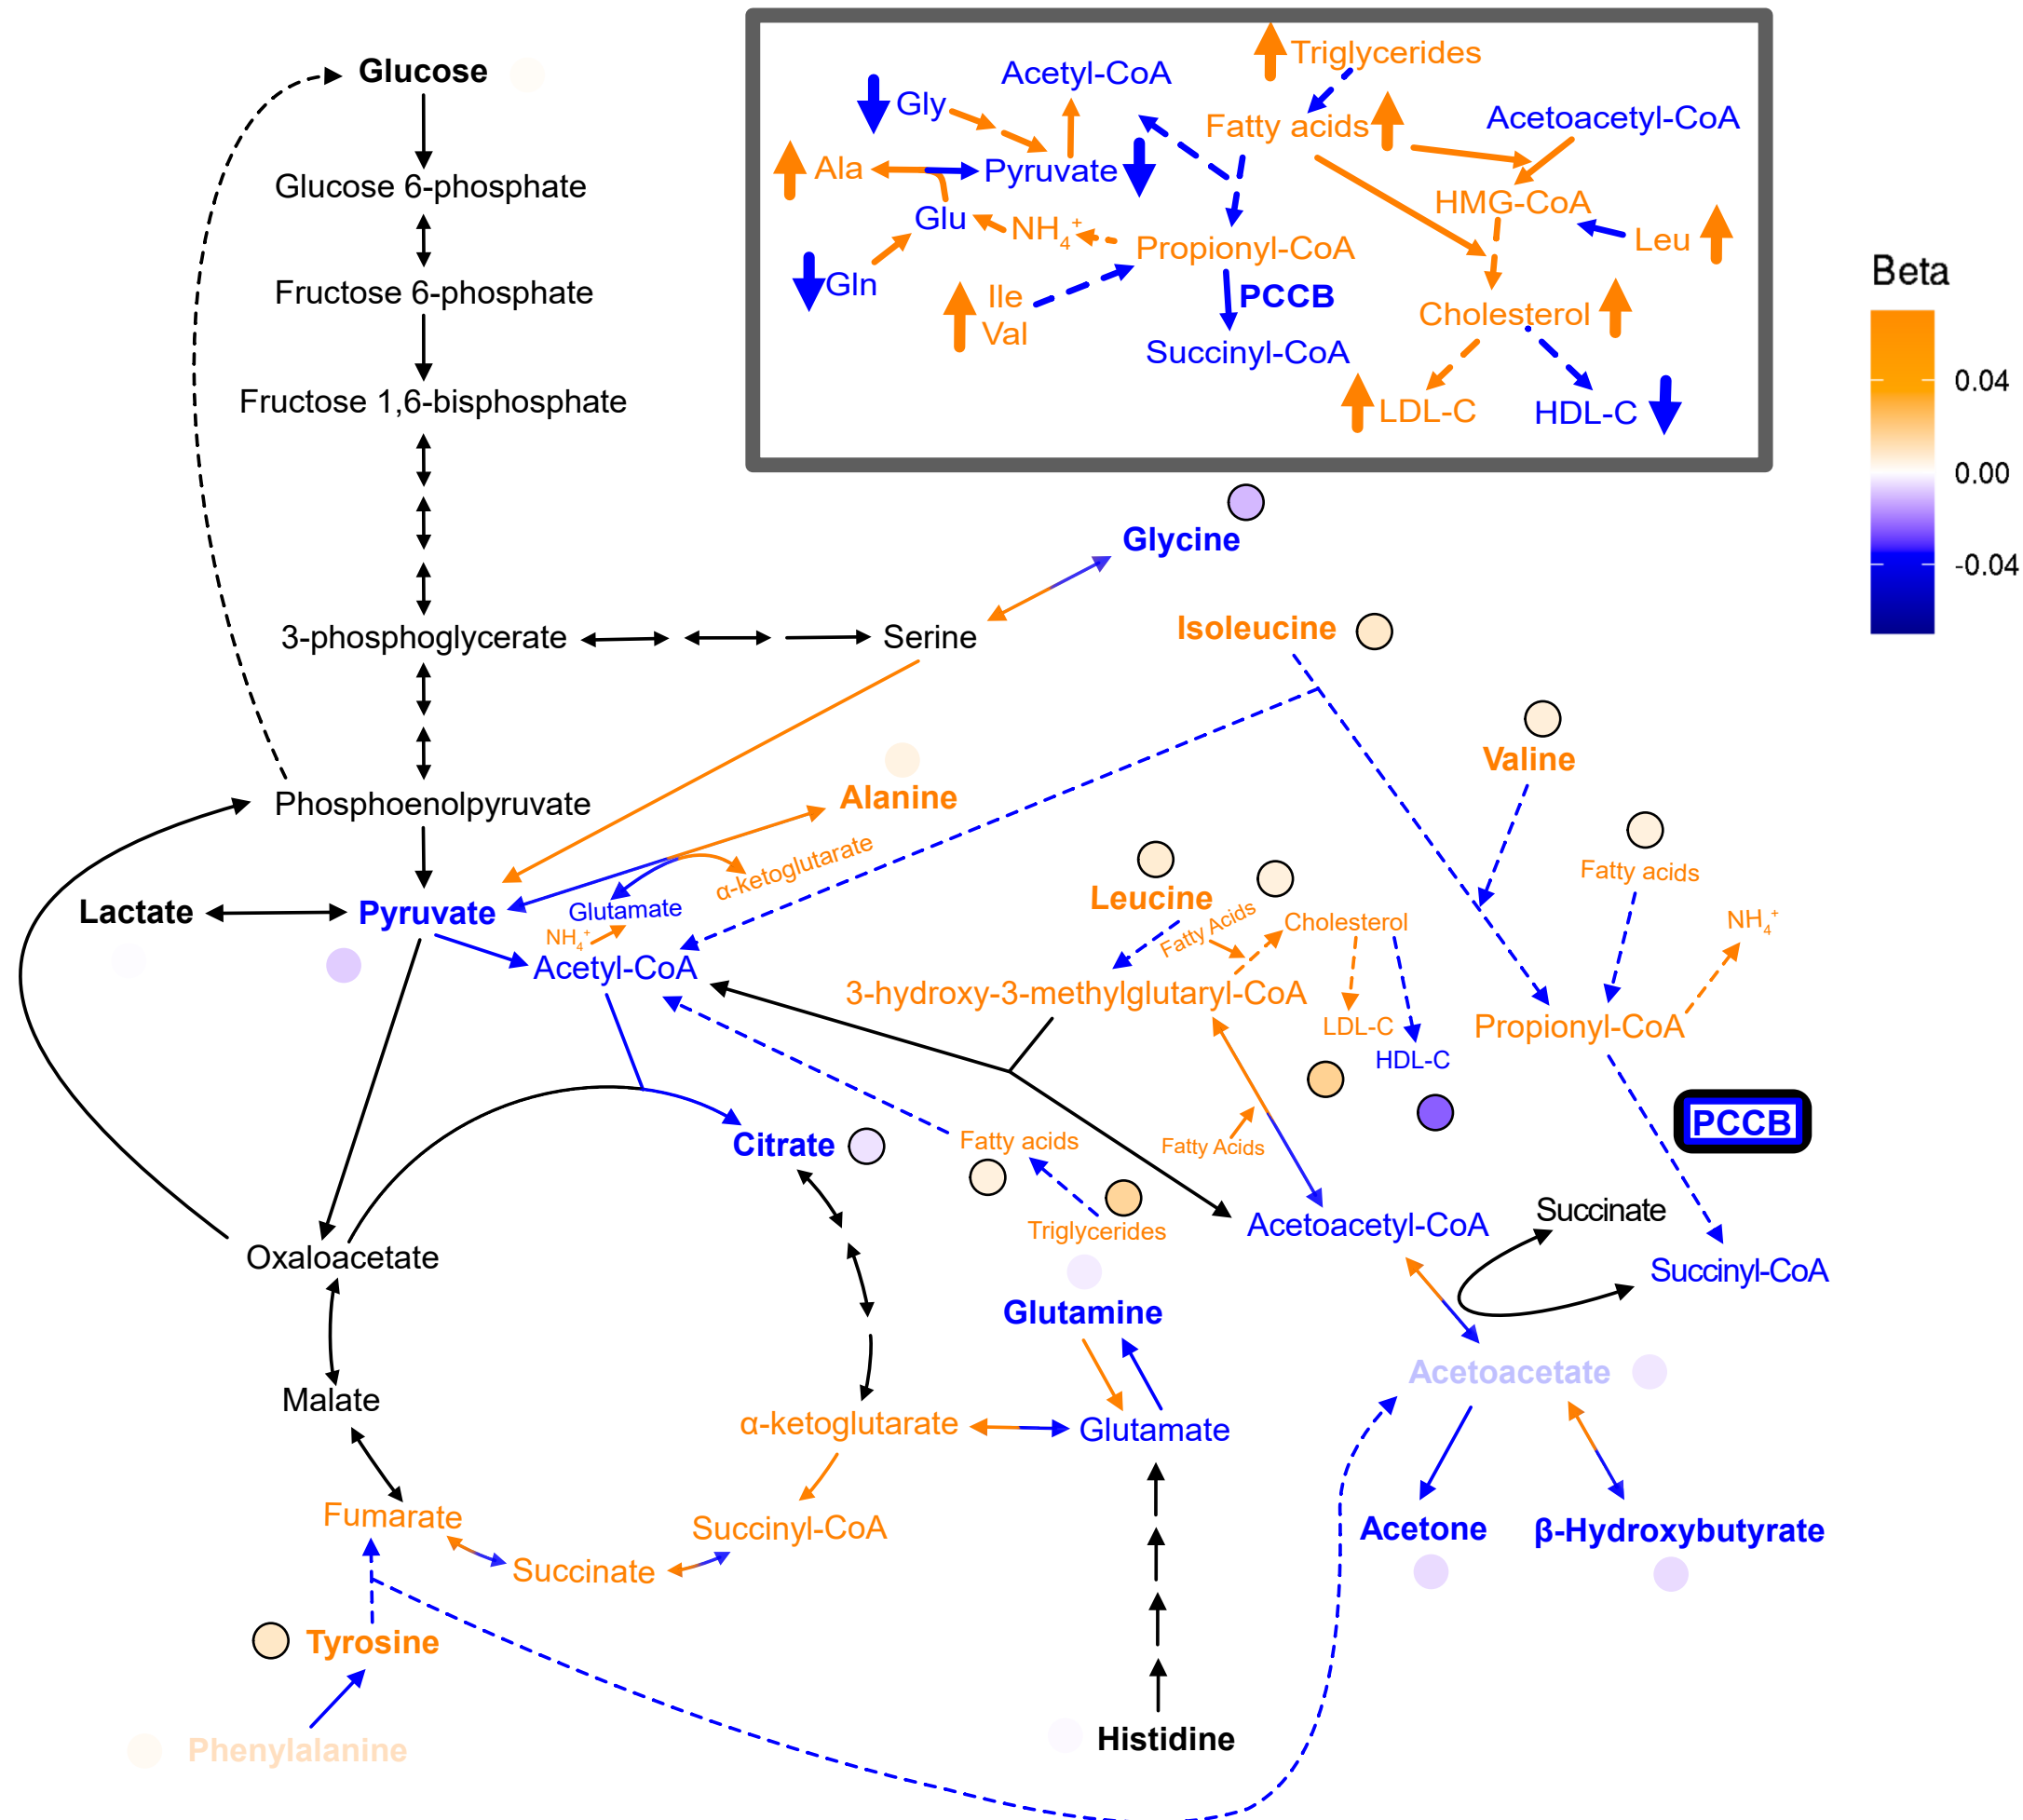

Supplement: supp [file elife-79348-supp-v1.zip]

**(a) Discordant Variant Model**

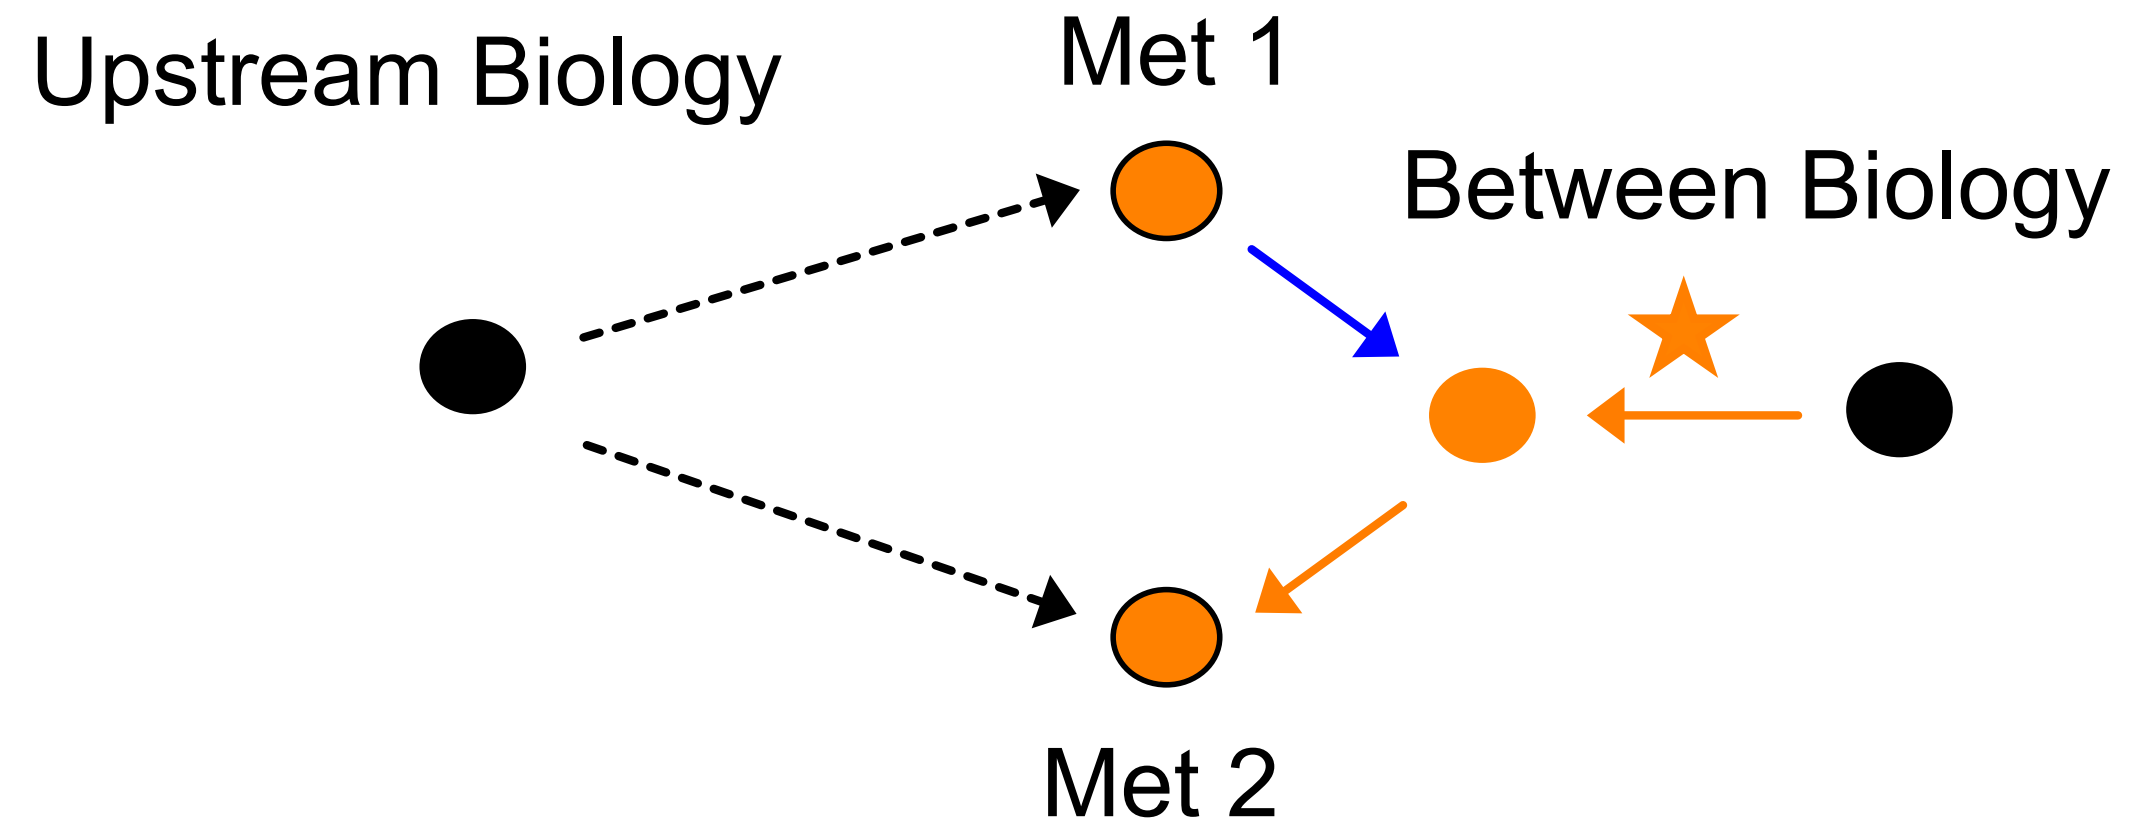

**(b) Concordant Variant Model**

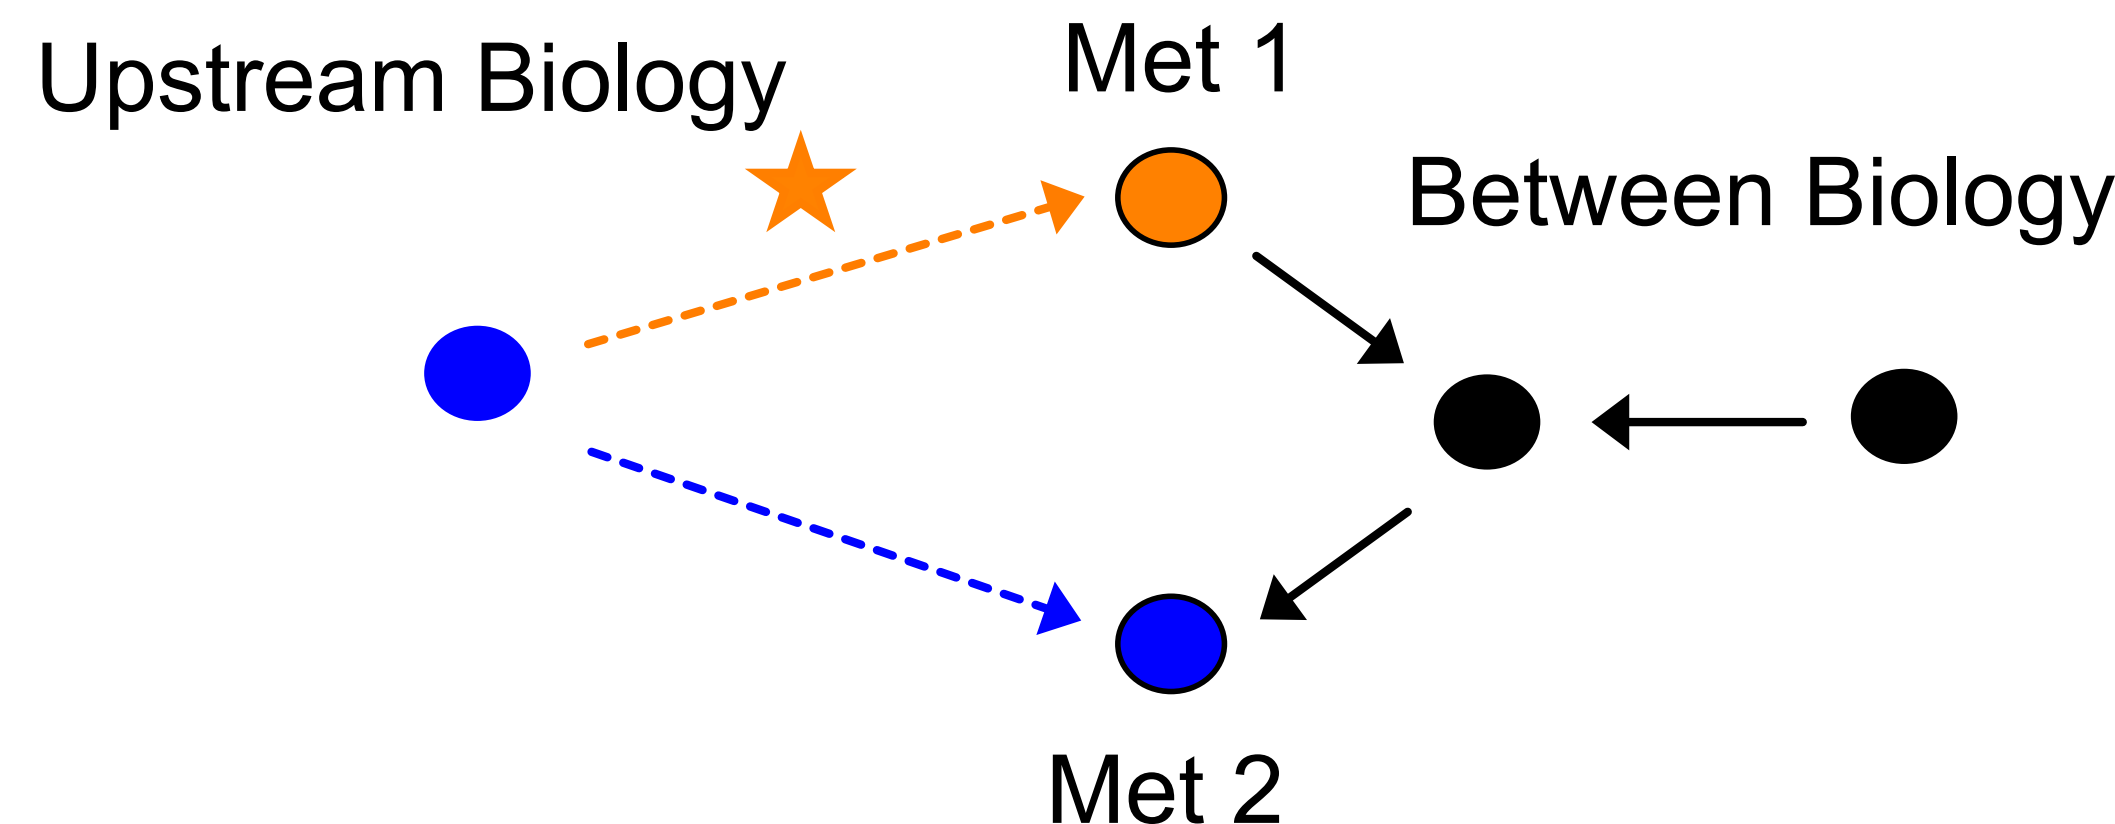

Supplement: supp [file elife-79348-supp-v1.zip]

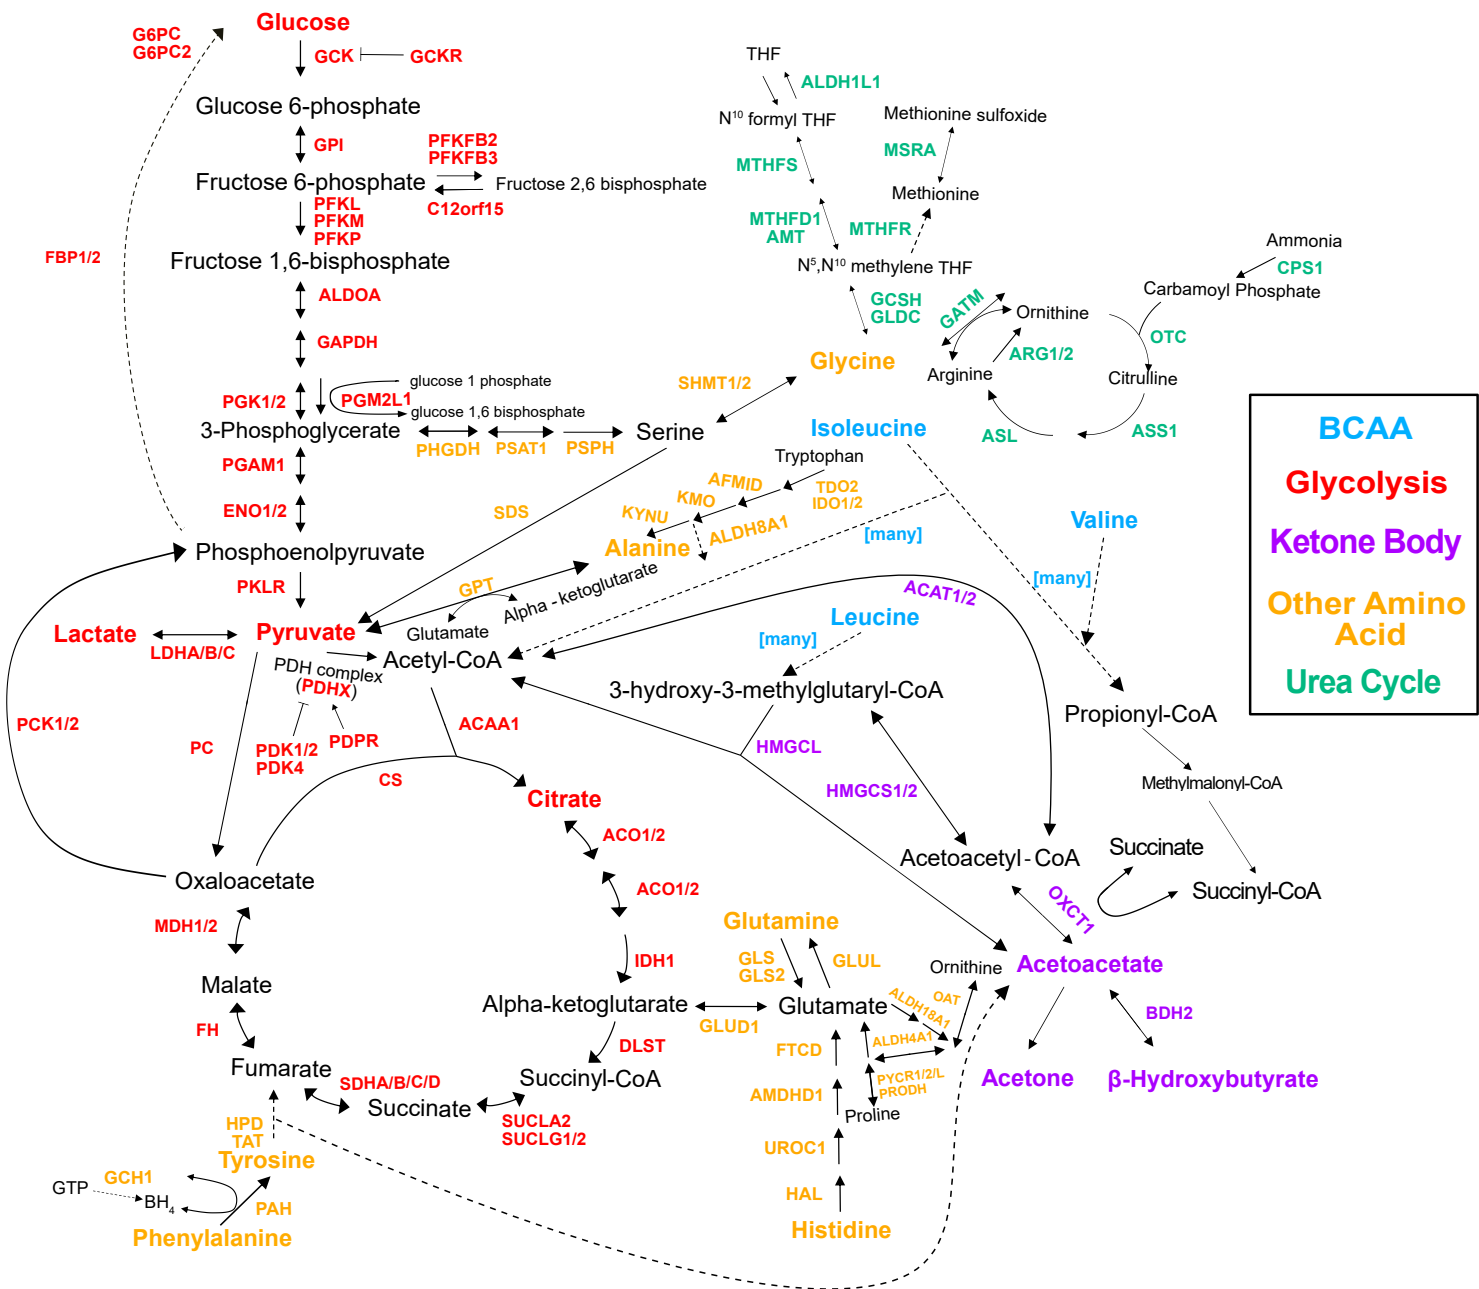

Supplement: supp [file elife-79348-supp-v1.zip]

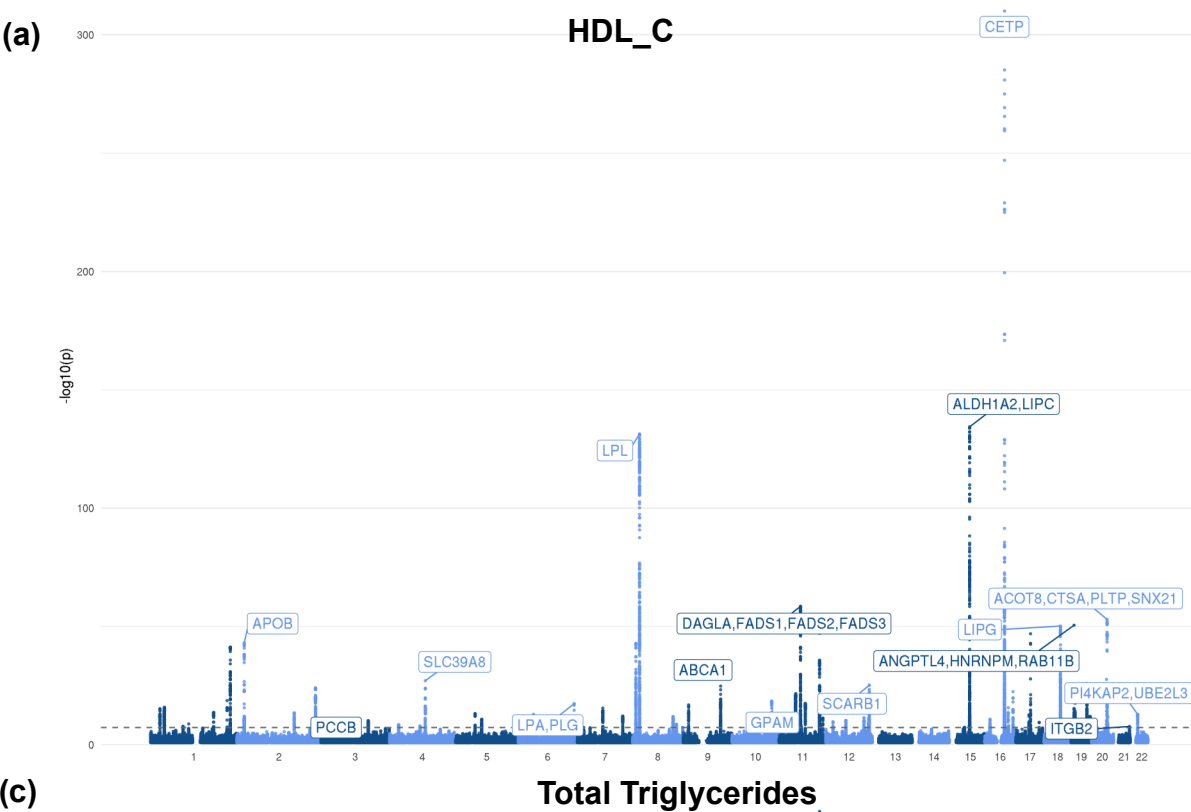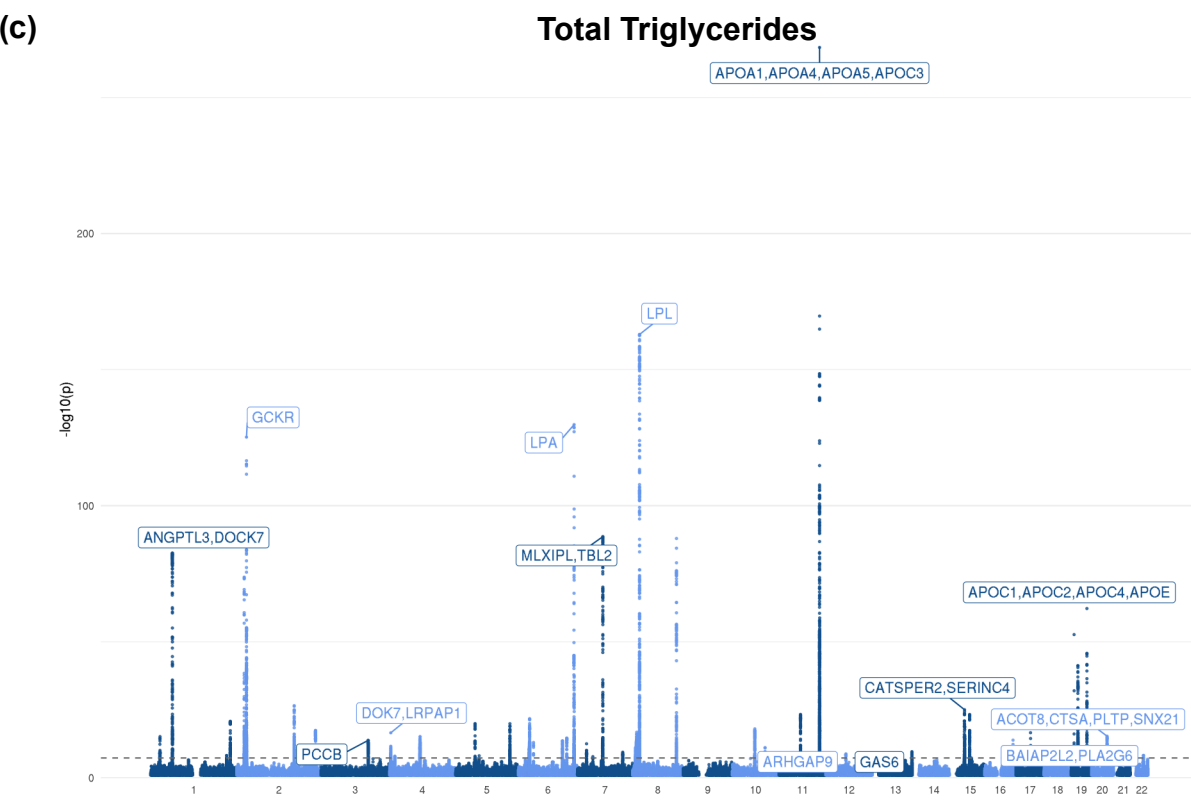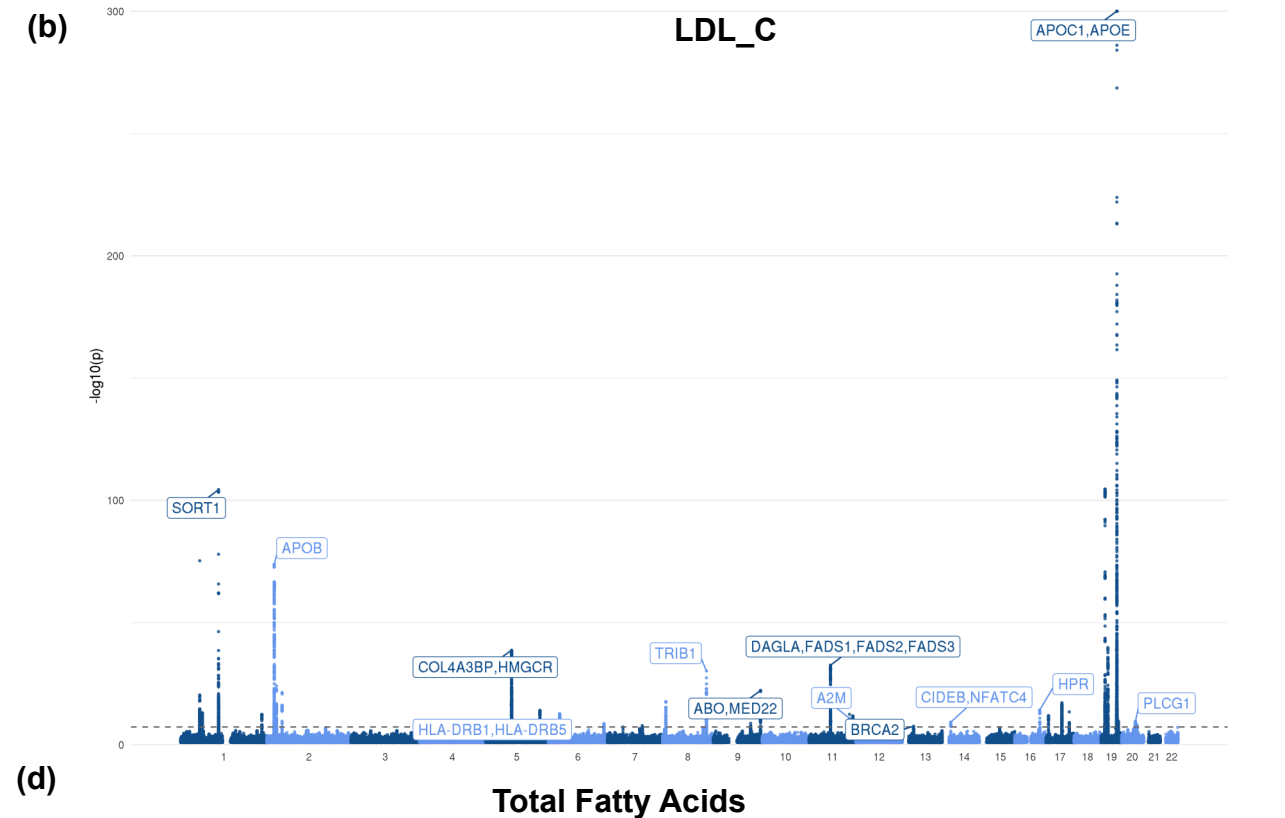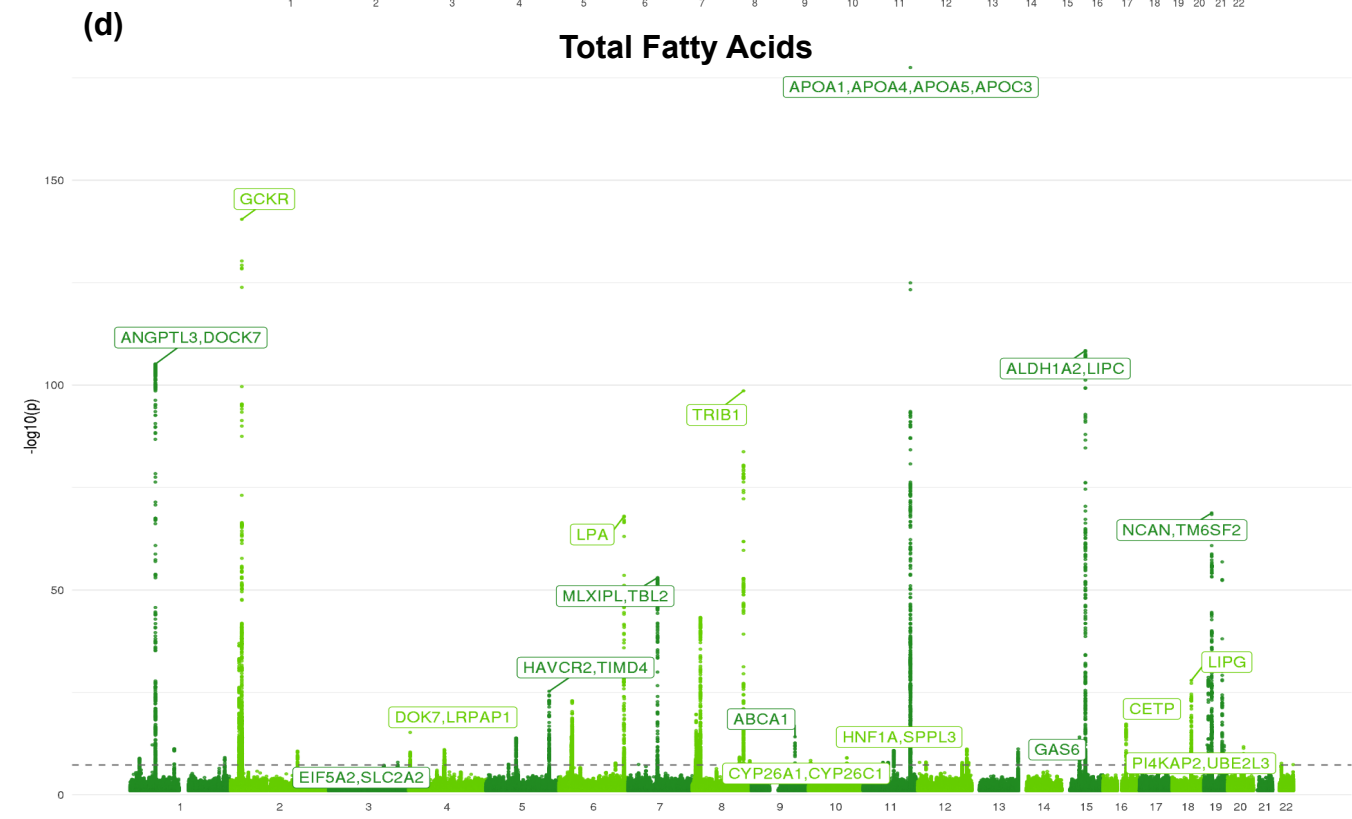

Supplement: supp [file elife-79348-supp-v1.zip]

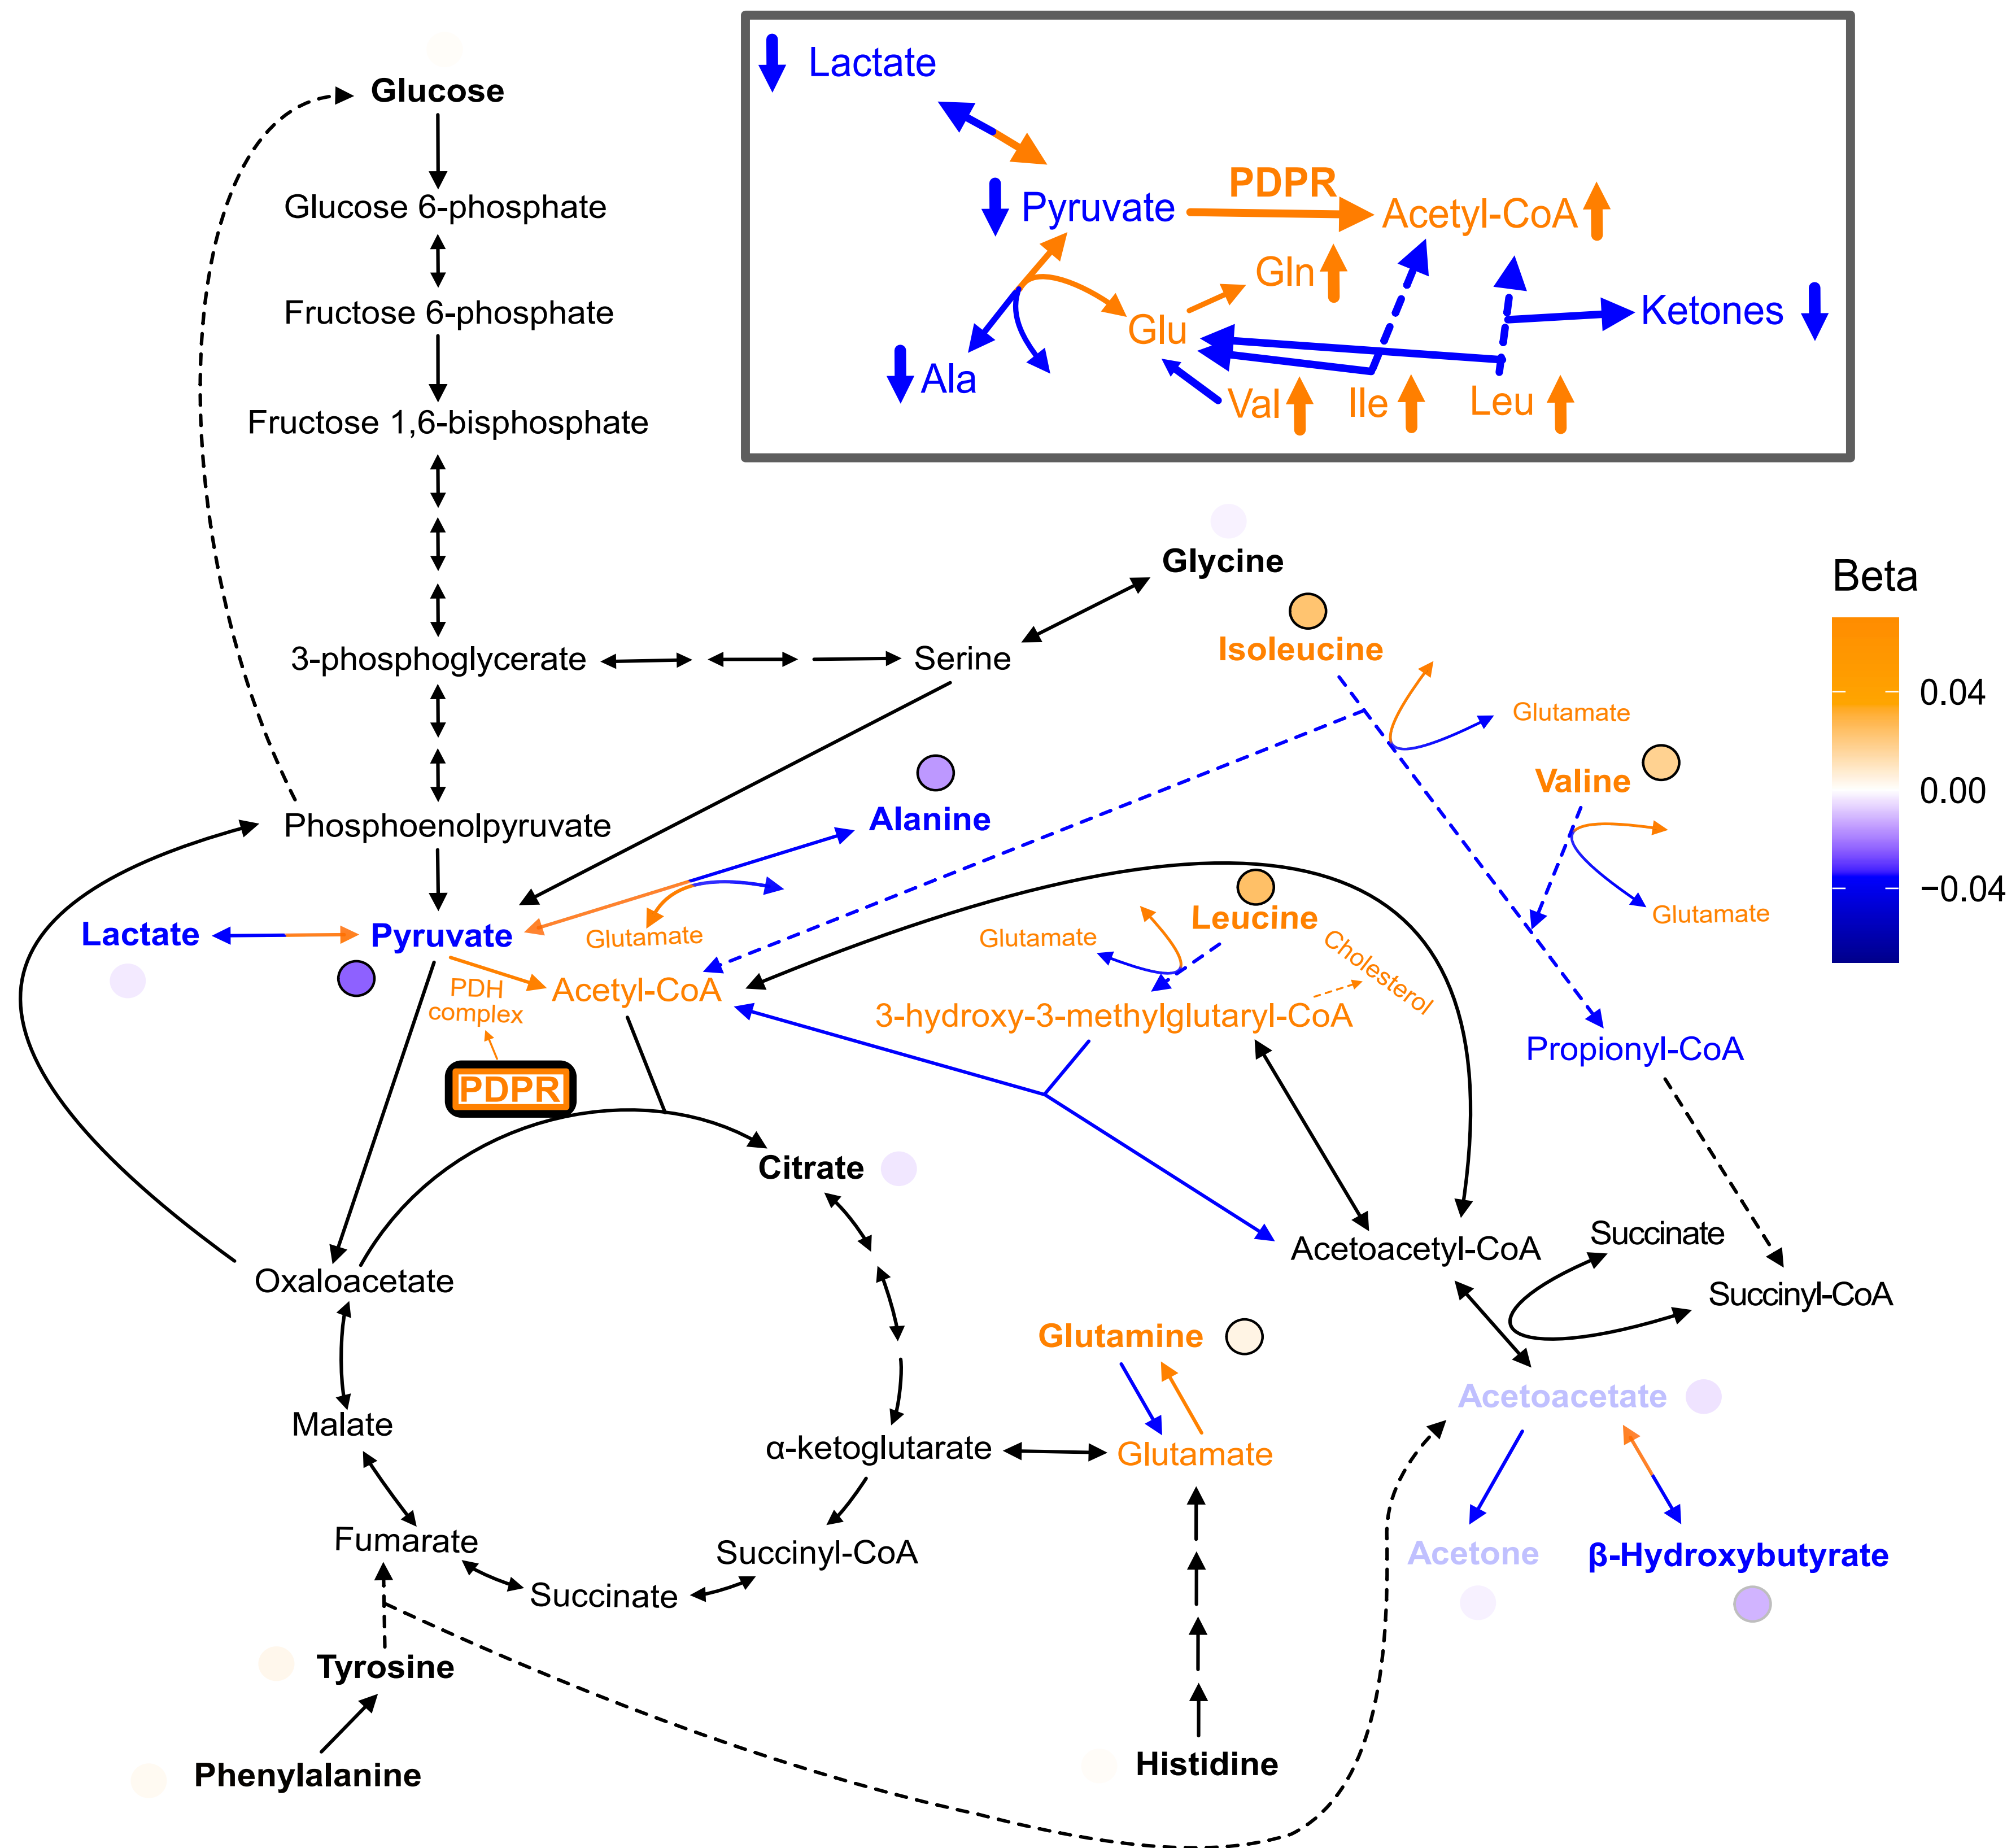

Supplement: supp [file elife-79348-supp-v1.zip]

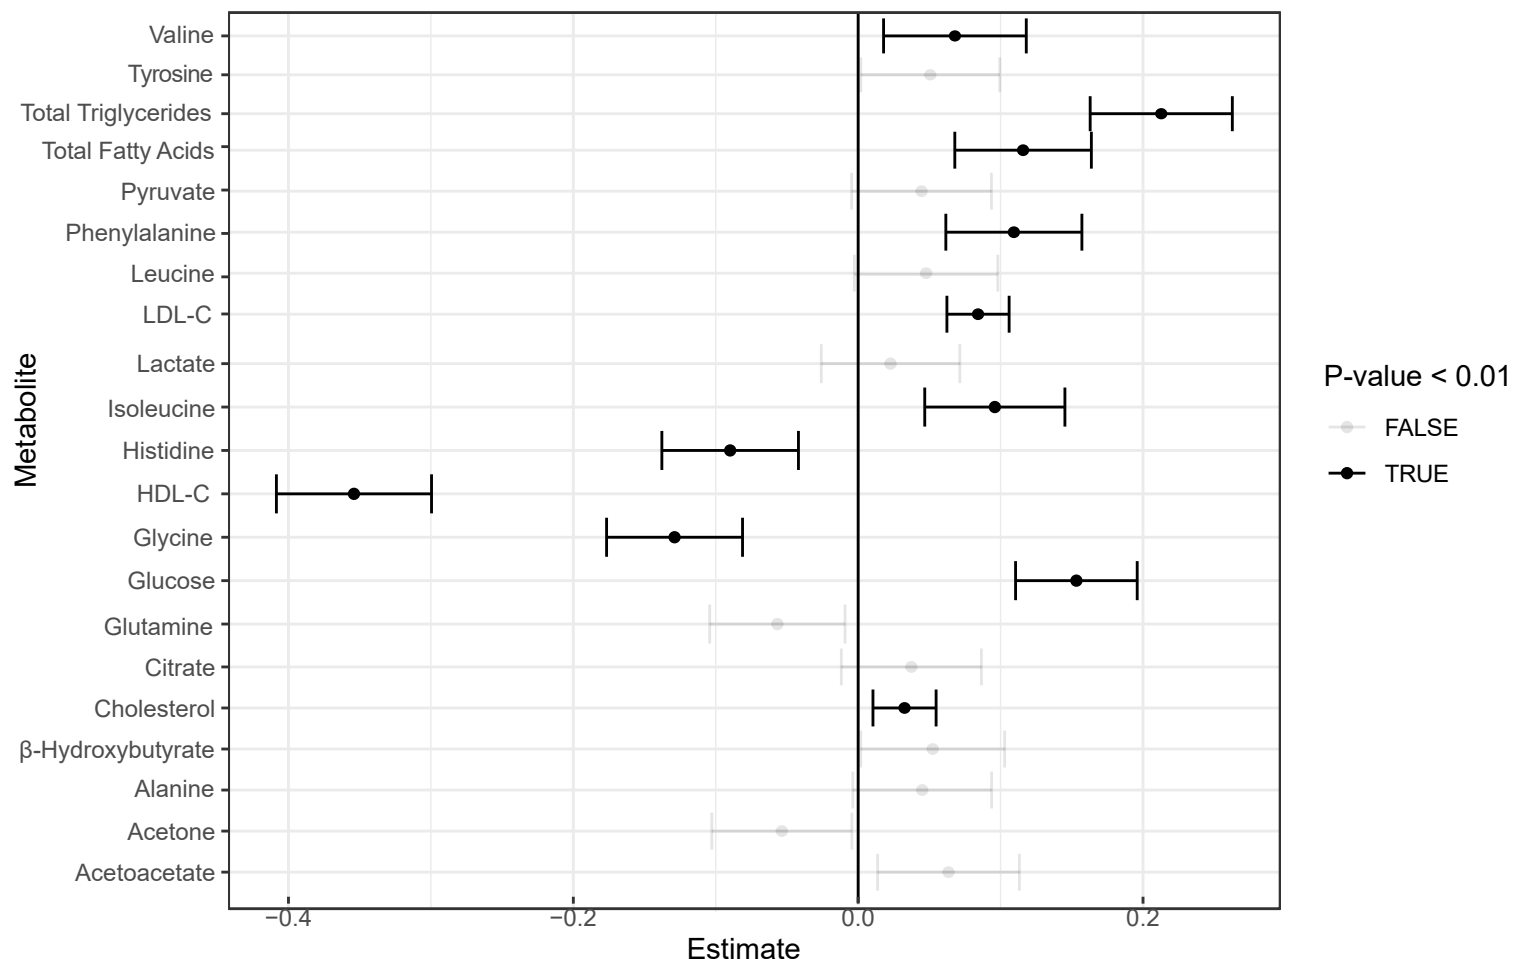

Supplement: supp [file elife-79348-supp-v1.zip]

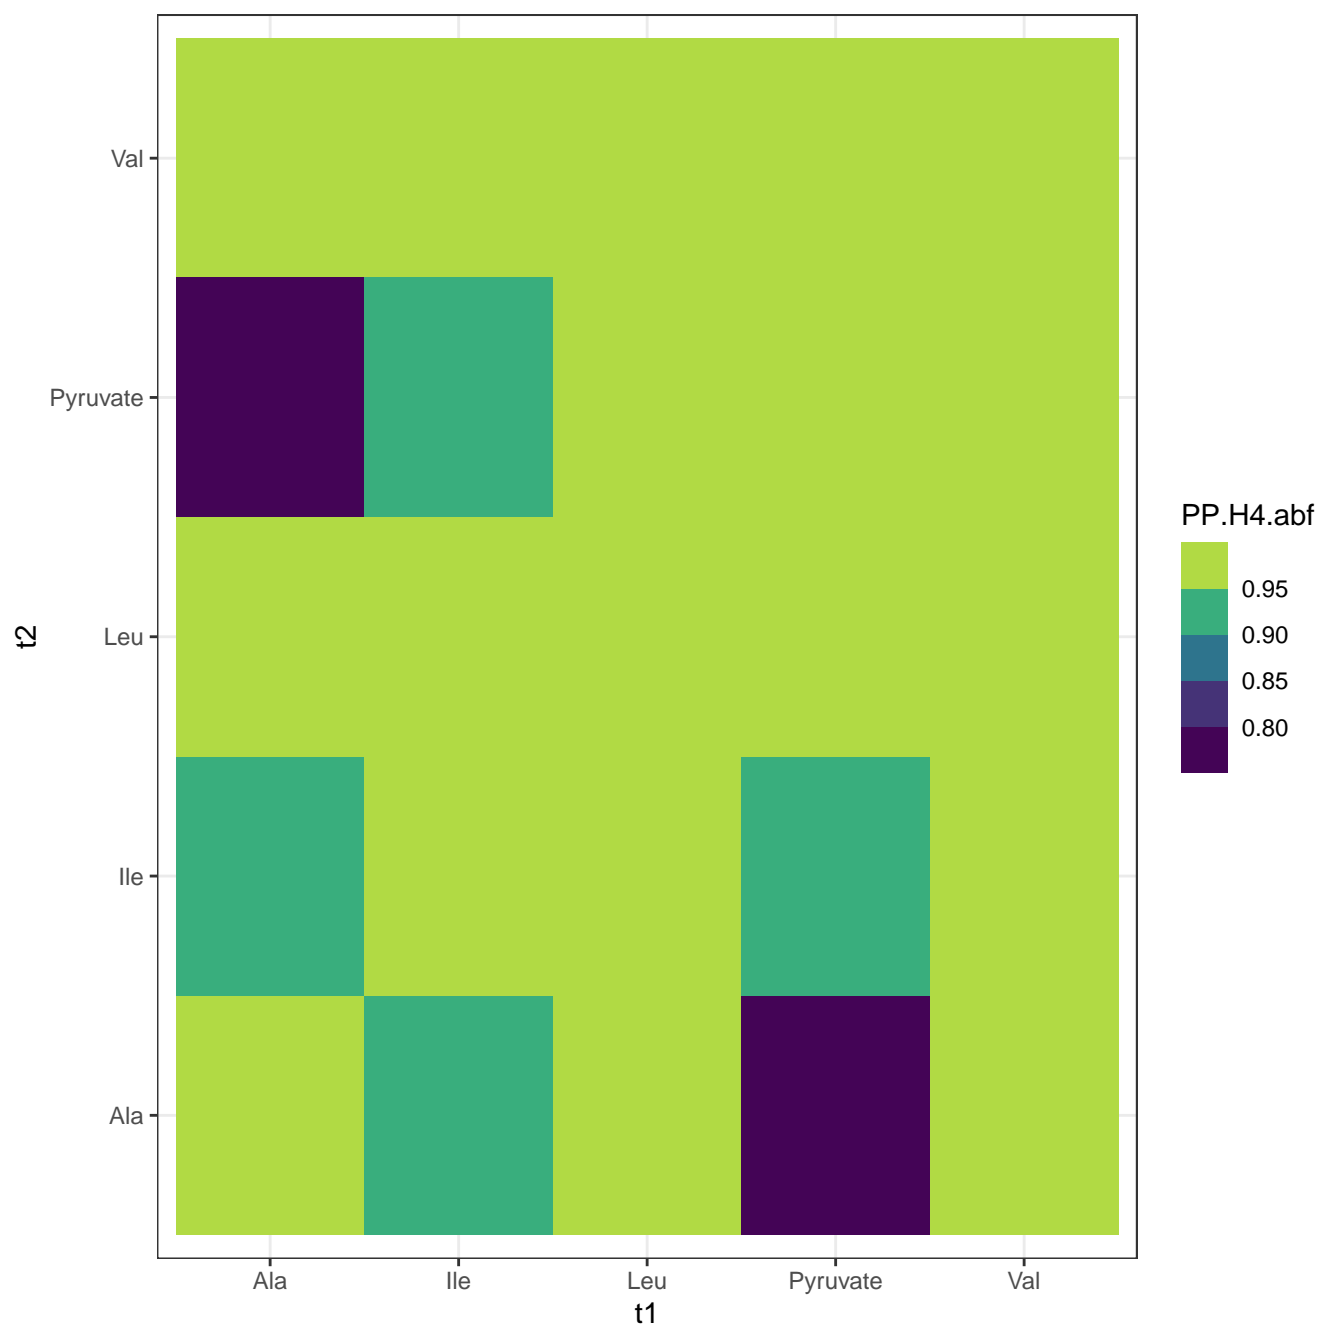

Supplement: supp [file elife-79348-supp-v1.zip]

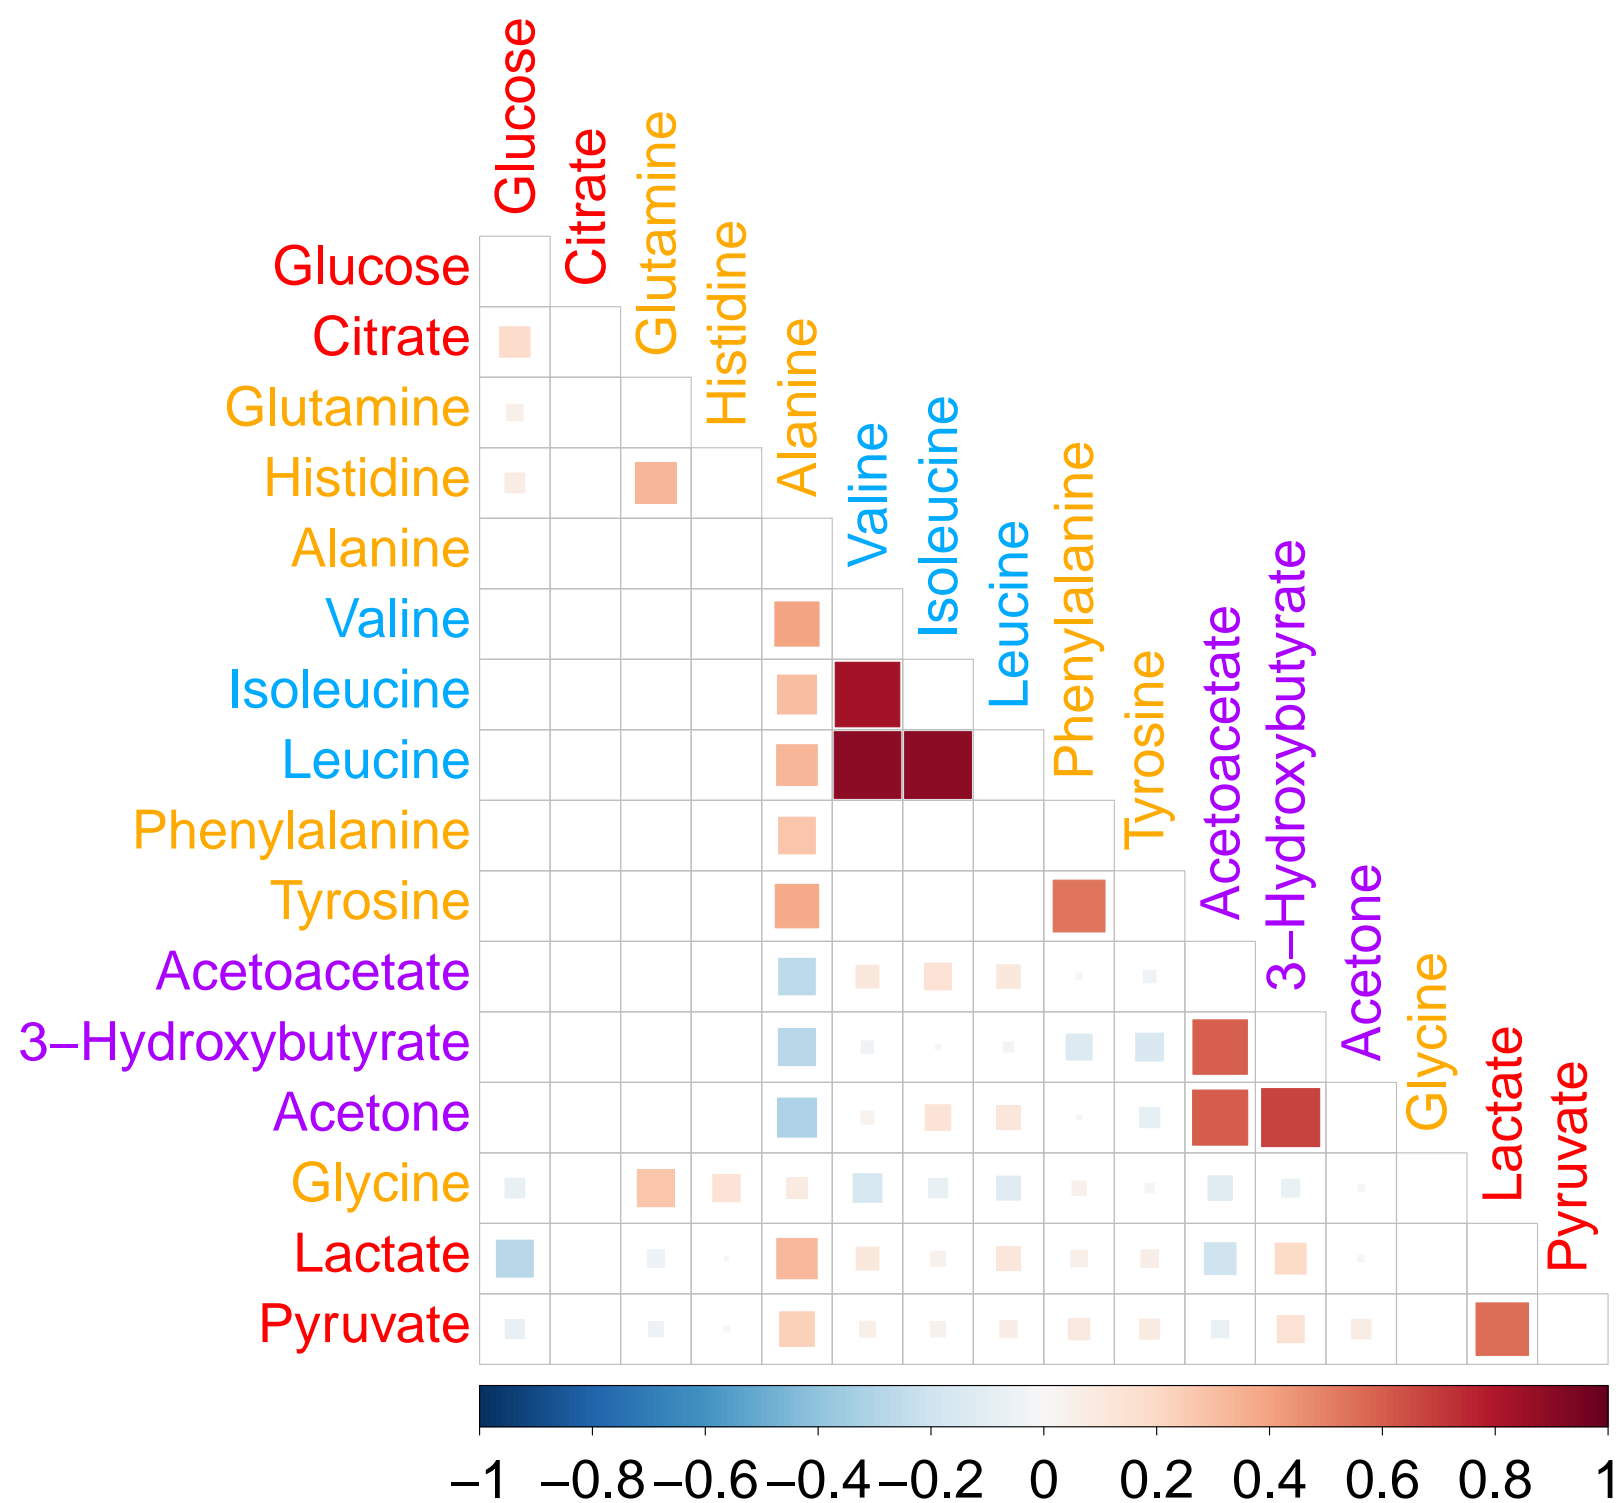

Supplement: supp [file elife-79348-supp-v1.zip]

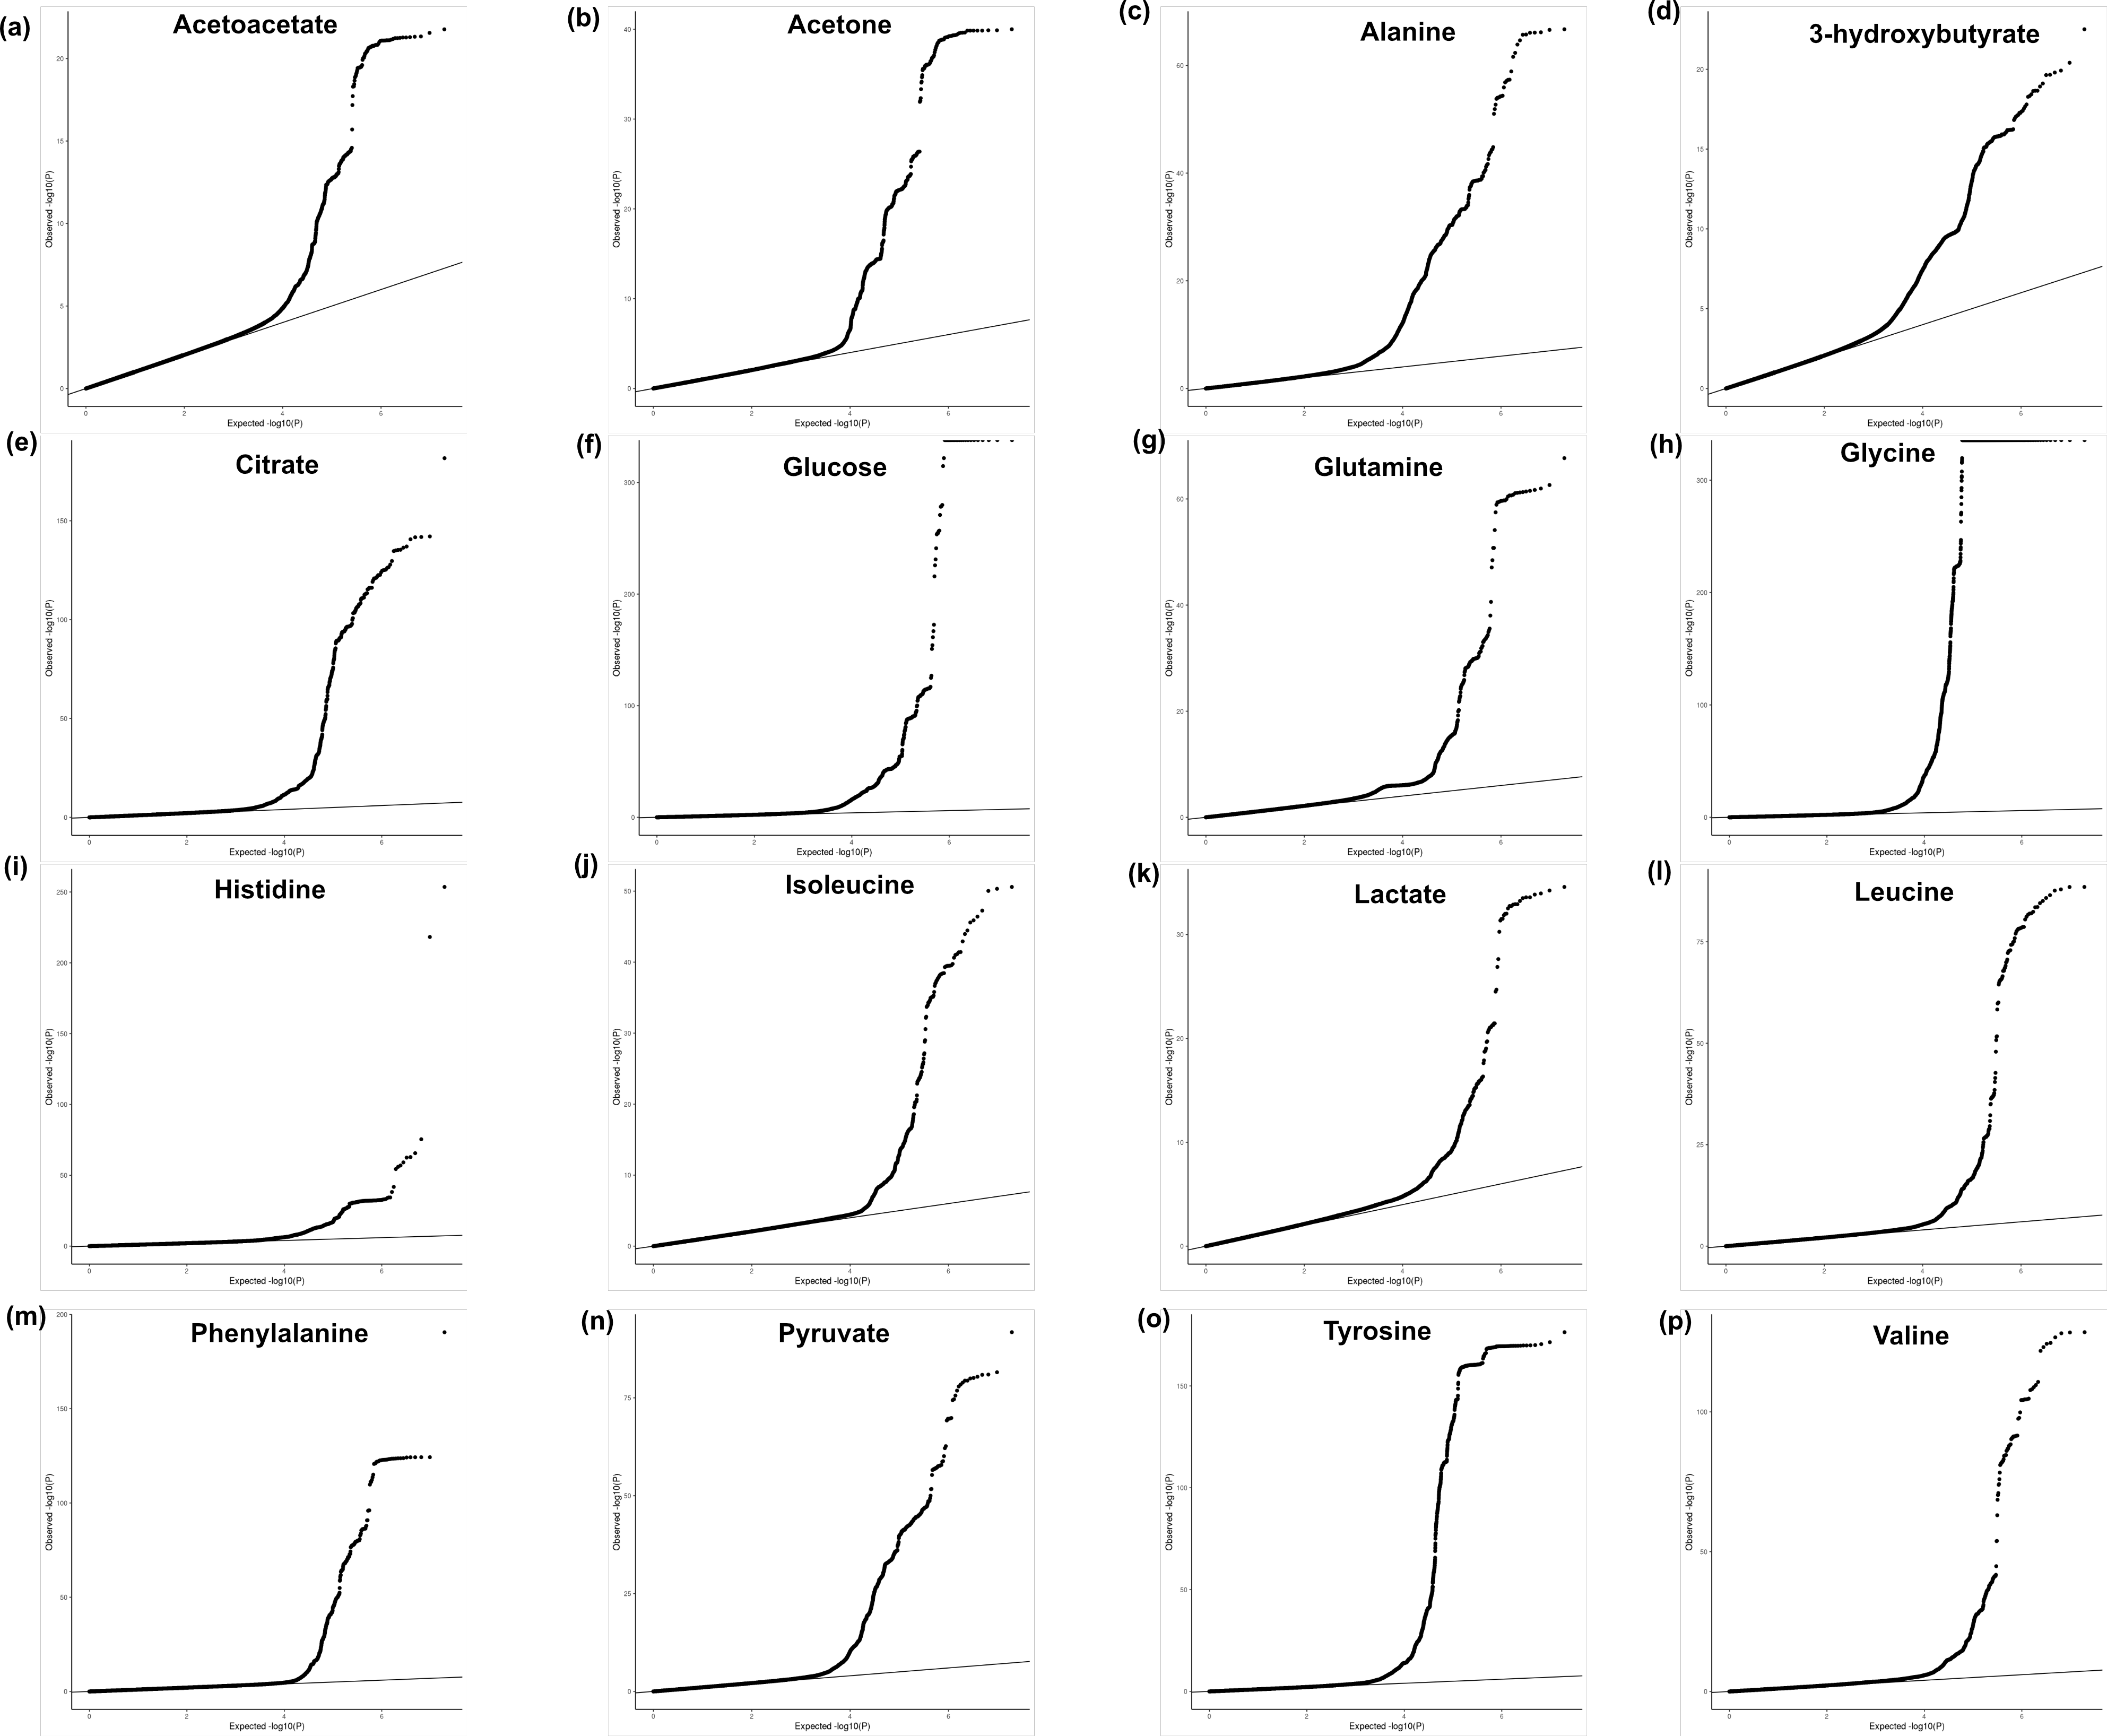

Supplement: supp [file elife-79348-supp-v1.zip › elife_poa_e79348_Figure_3_figure_supplement_2.tif]

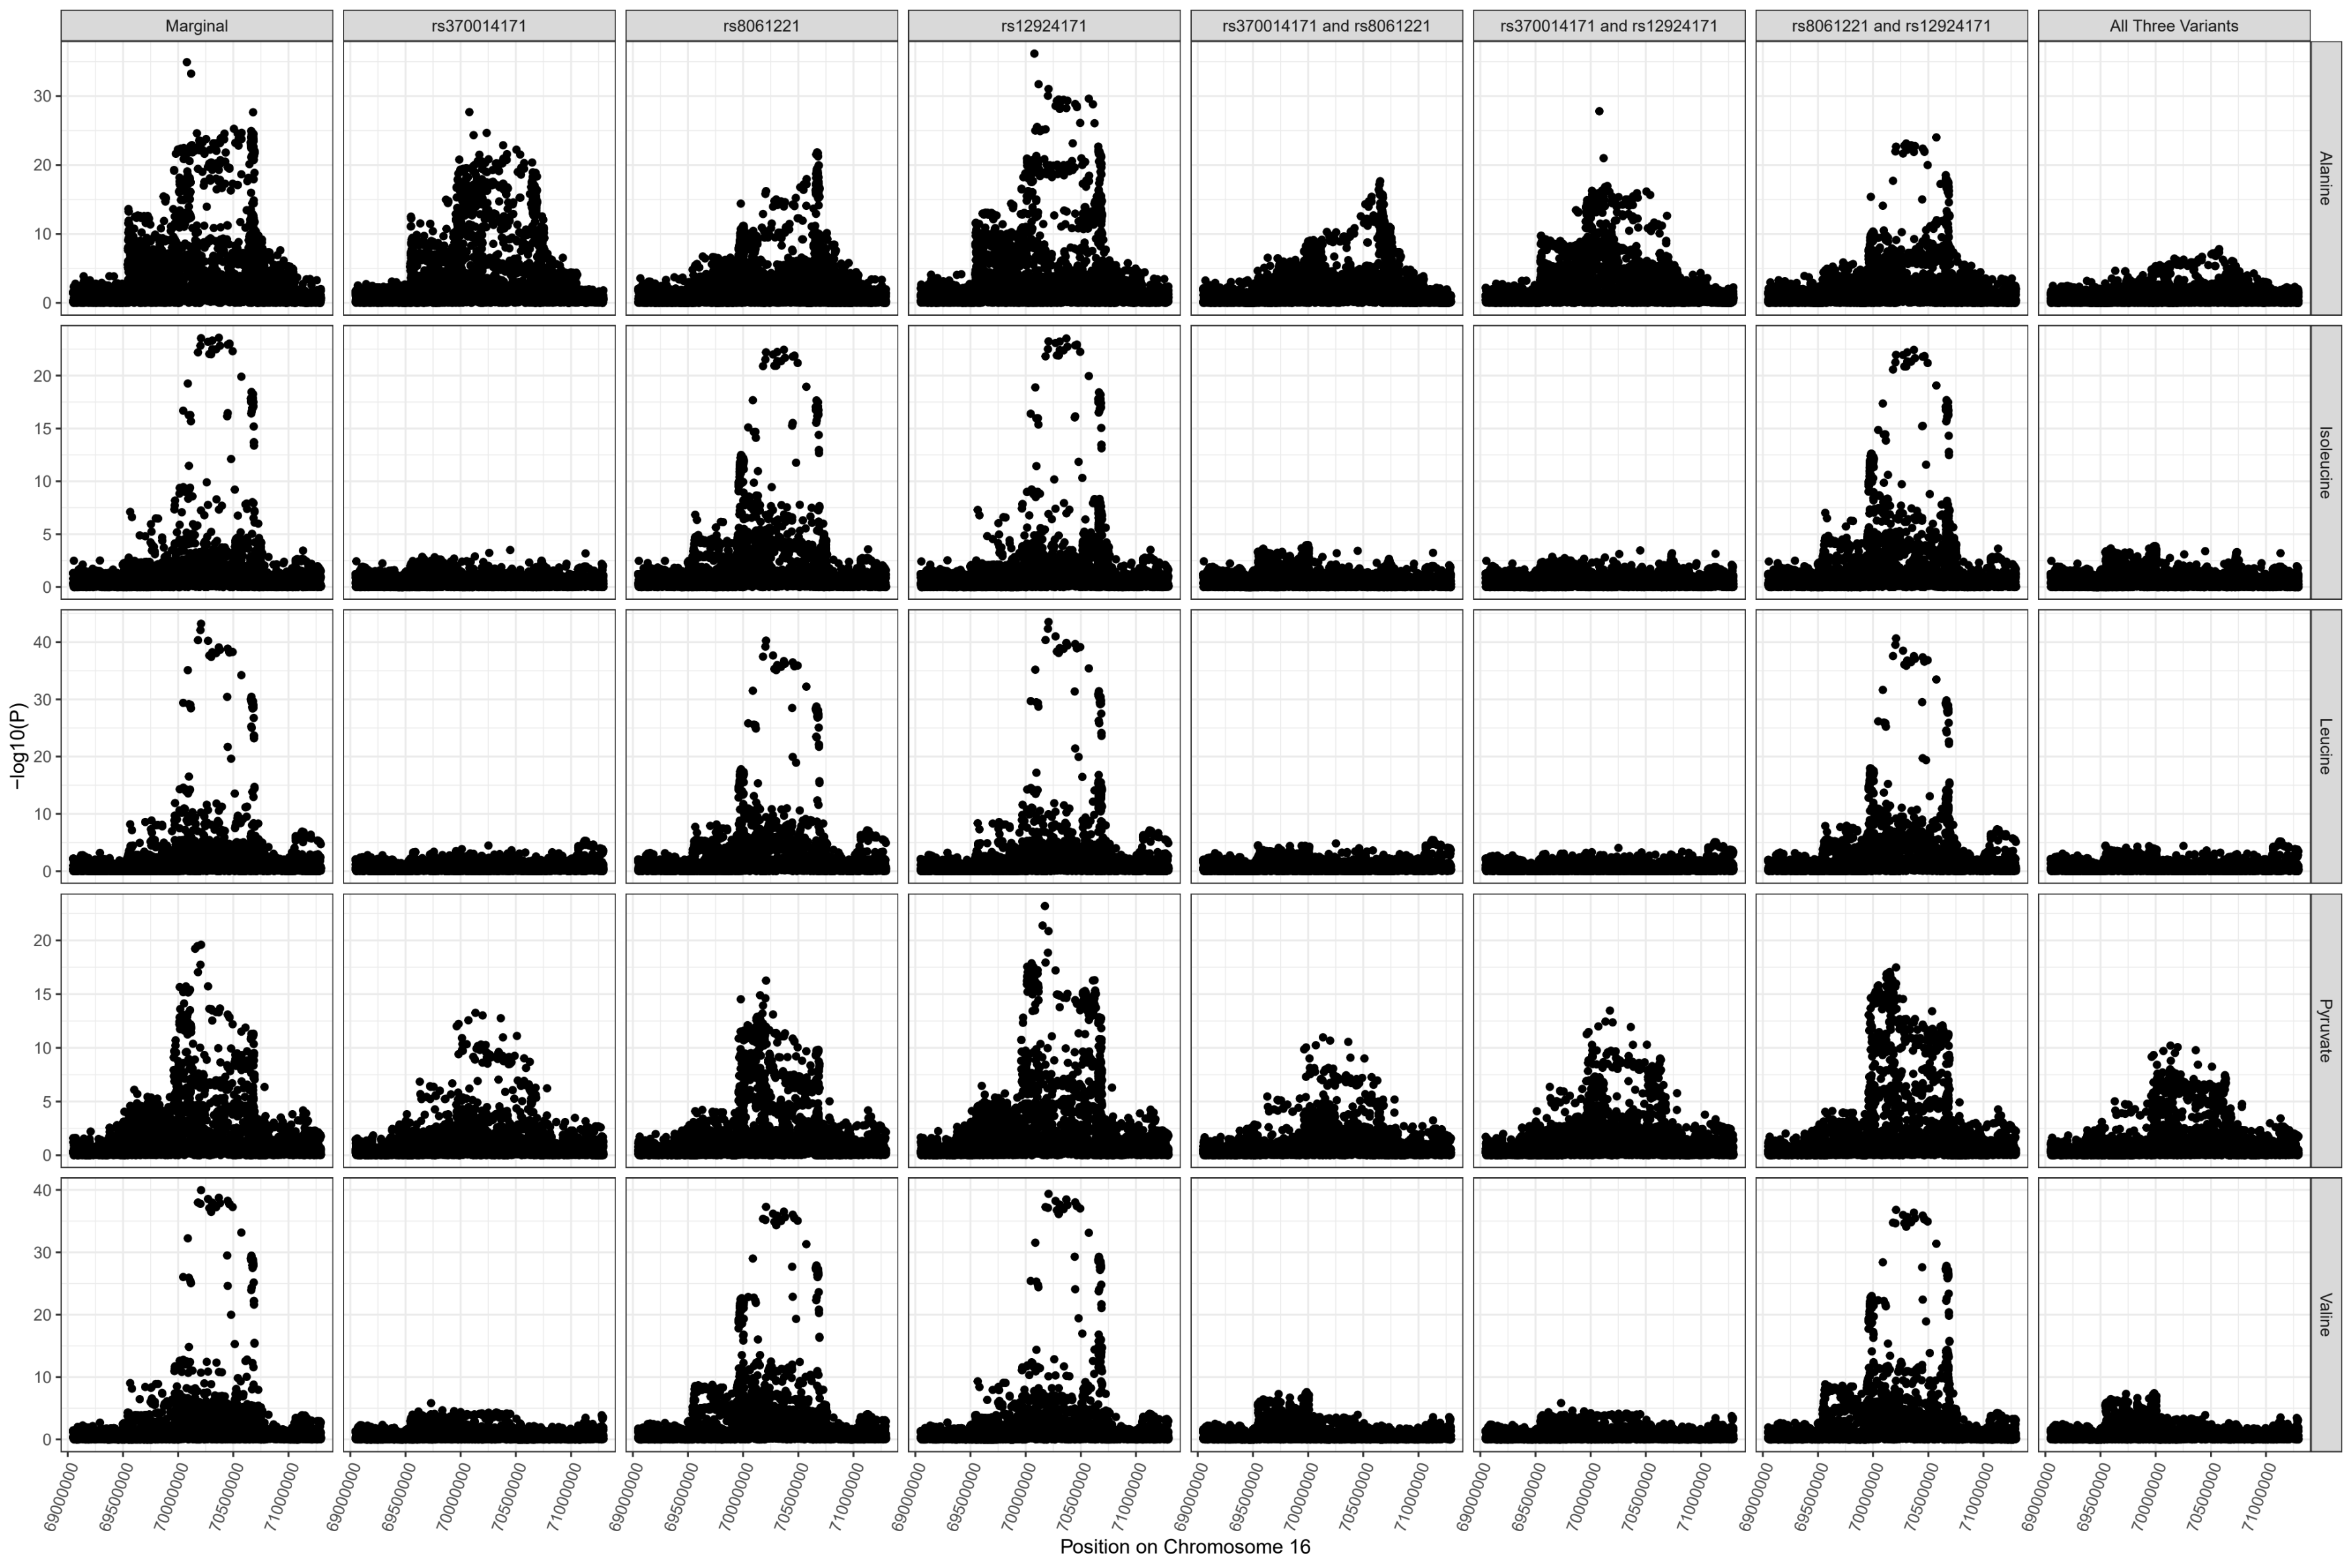

Supplement: supp [file elife-79348-supp-v1.zip › elife_poa_e79348_Figure_4_figure_supplement_2.tif]

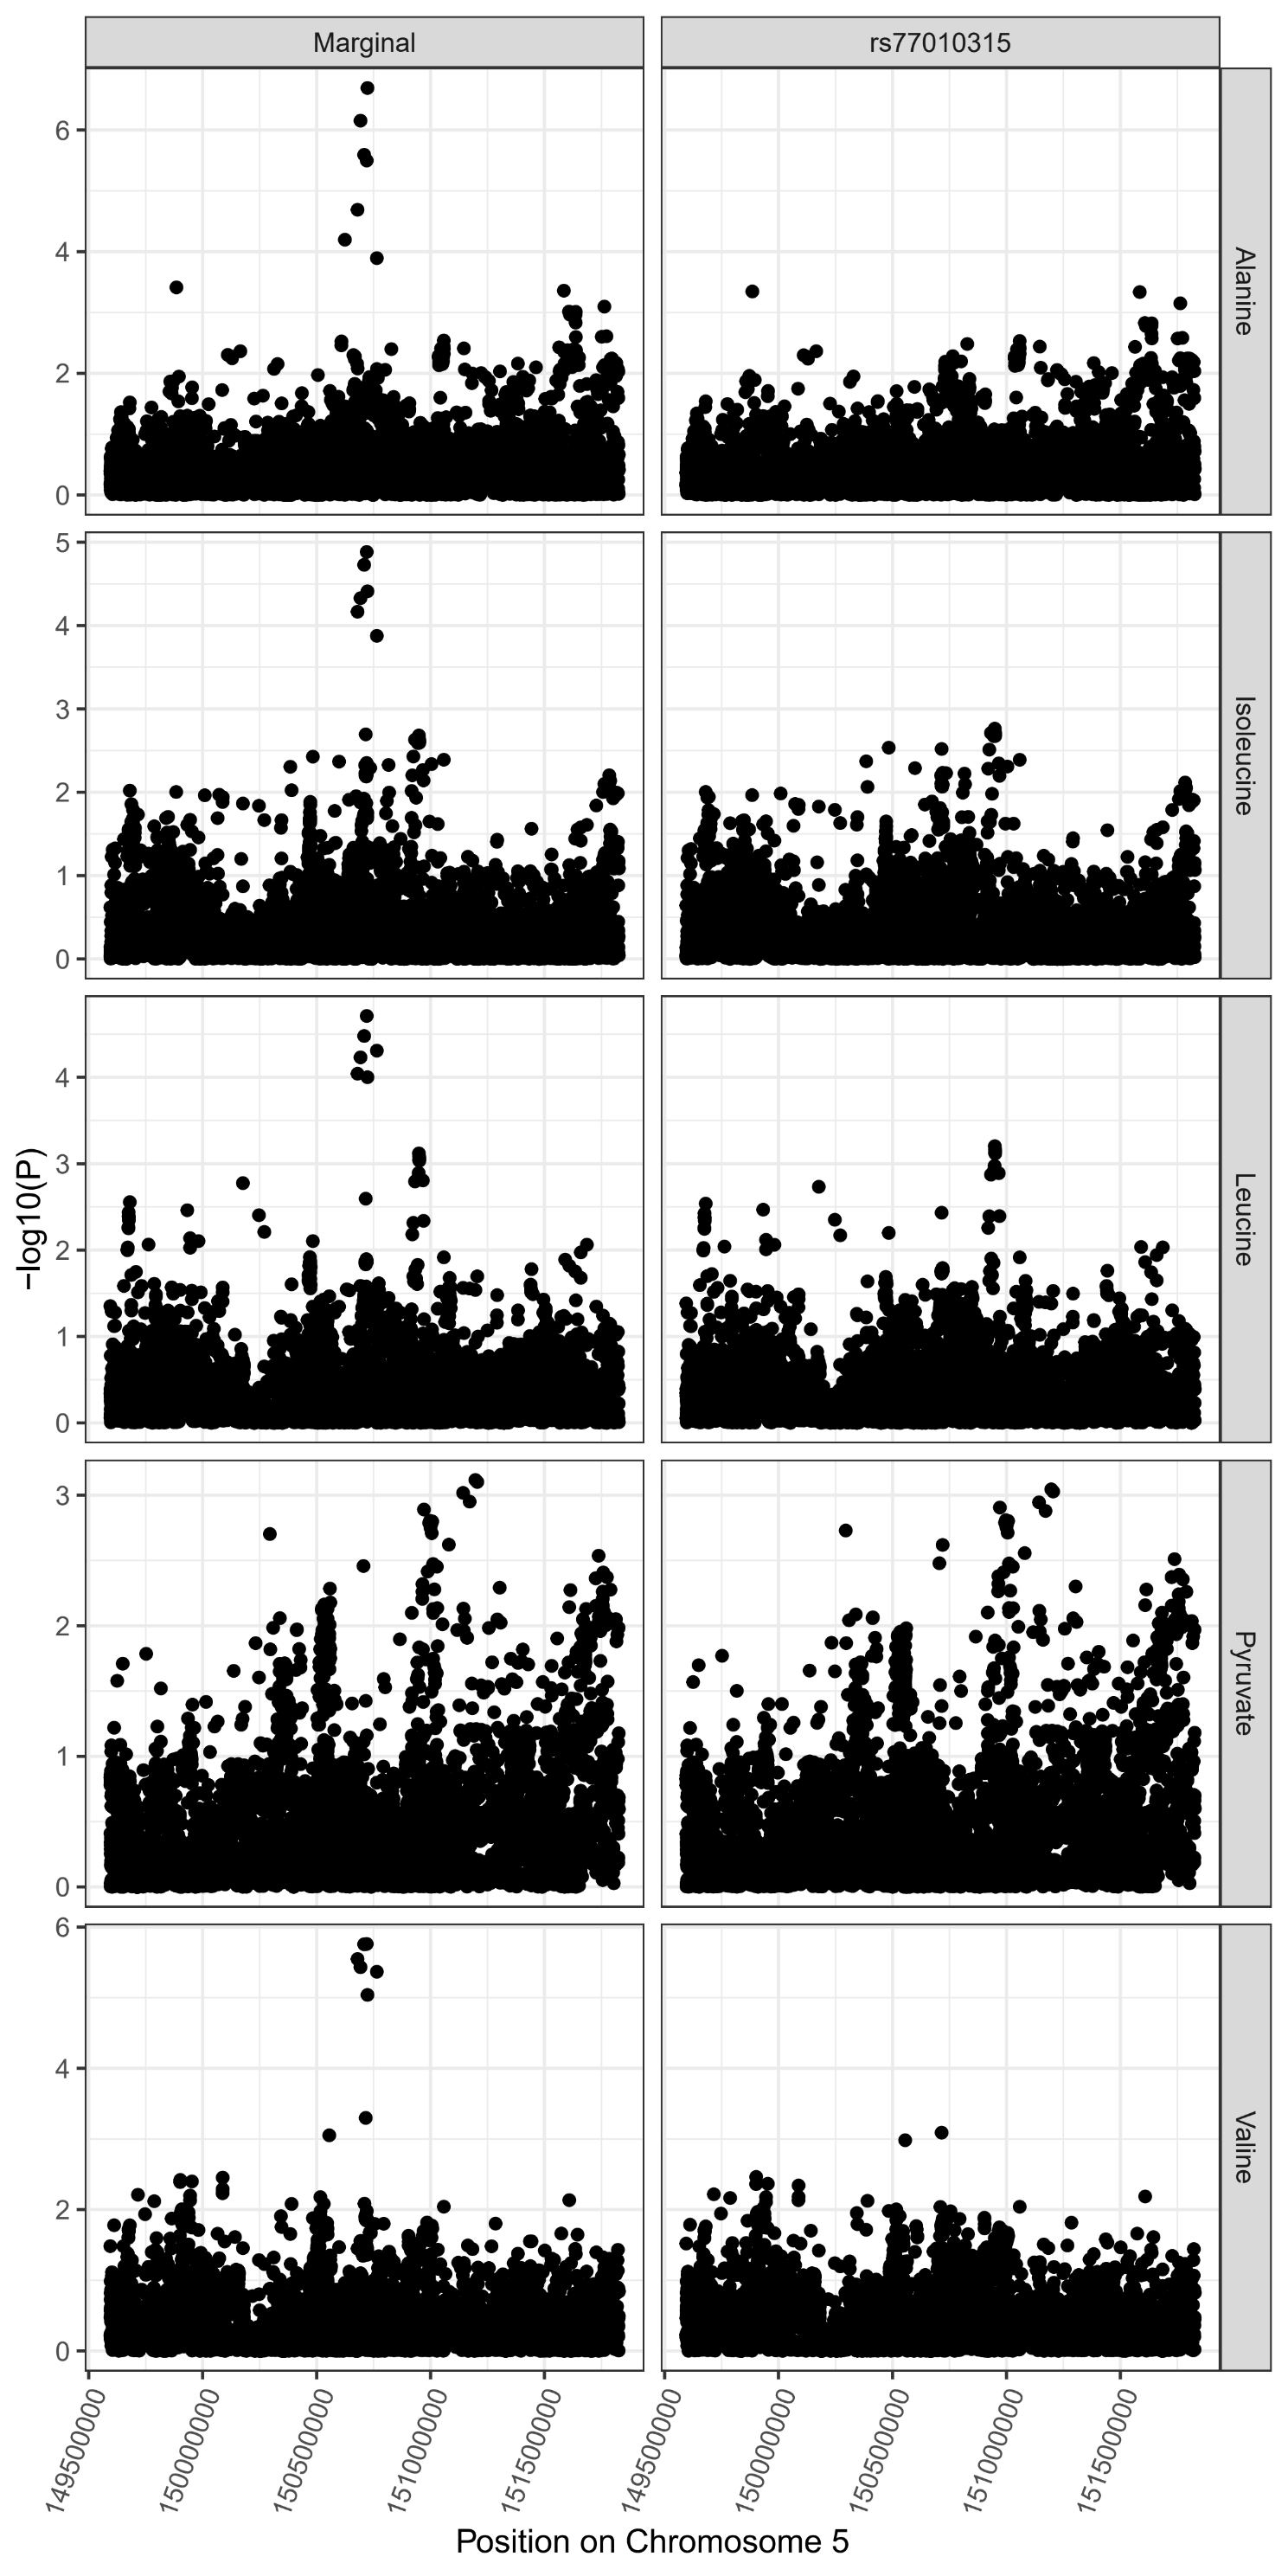

Supplement: supp [file elife-79348-supp-v1.zip › elife_poa_e79348_Figure_4_figure_supplement_6.tif]

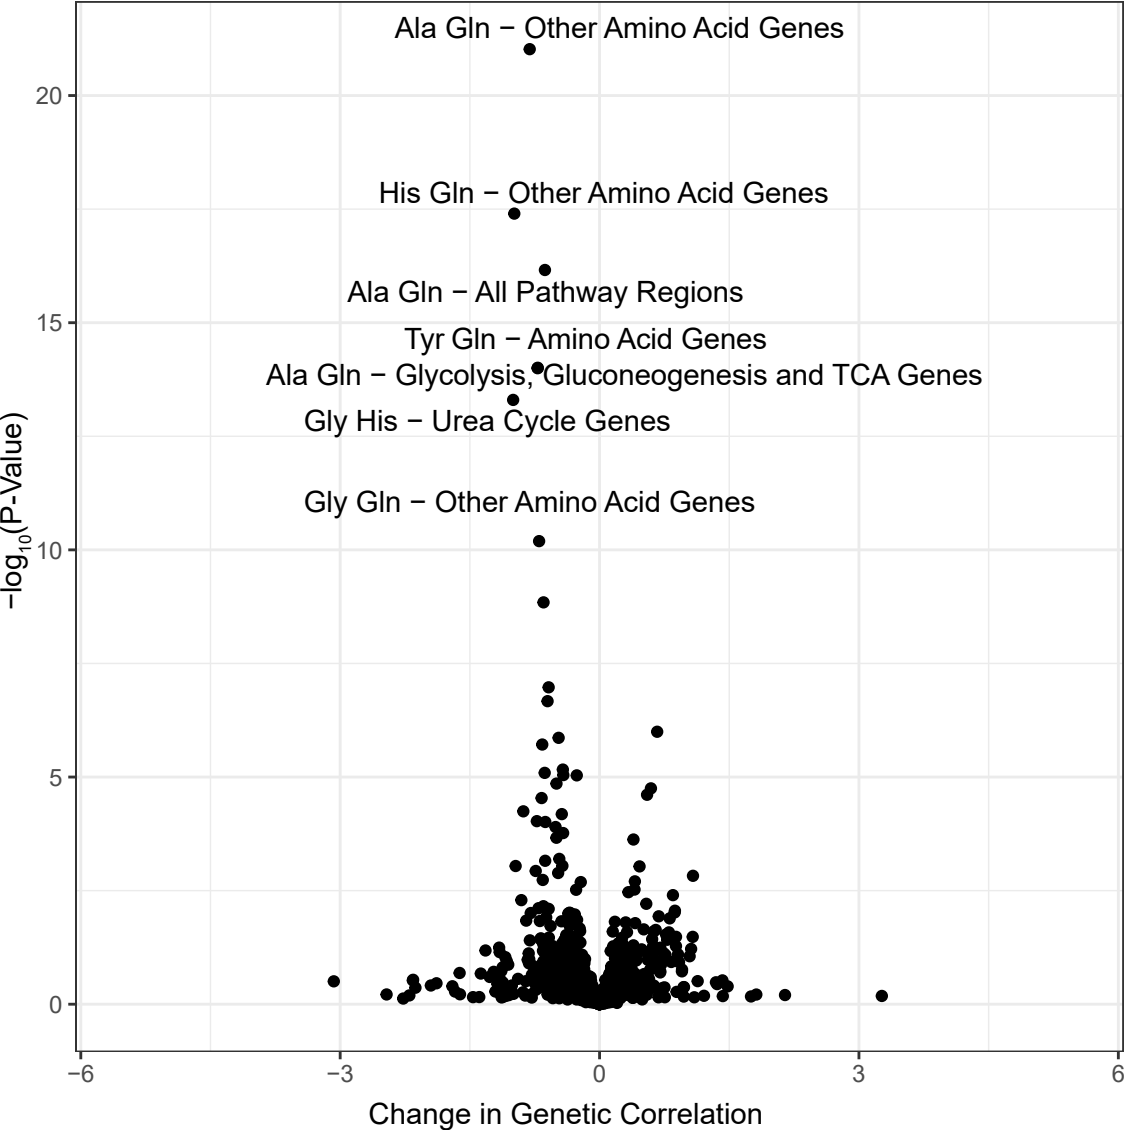

Supplement: supp [file elife-79348-supp-v1.zip › elife_poa_e79348_Figure_6_figure_supplement_1.pdf]

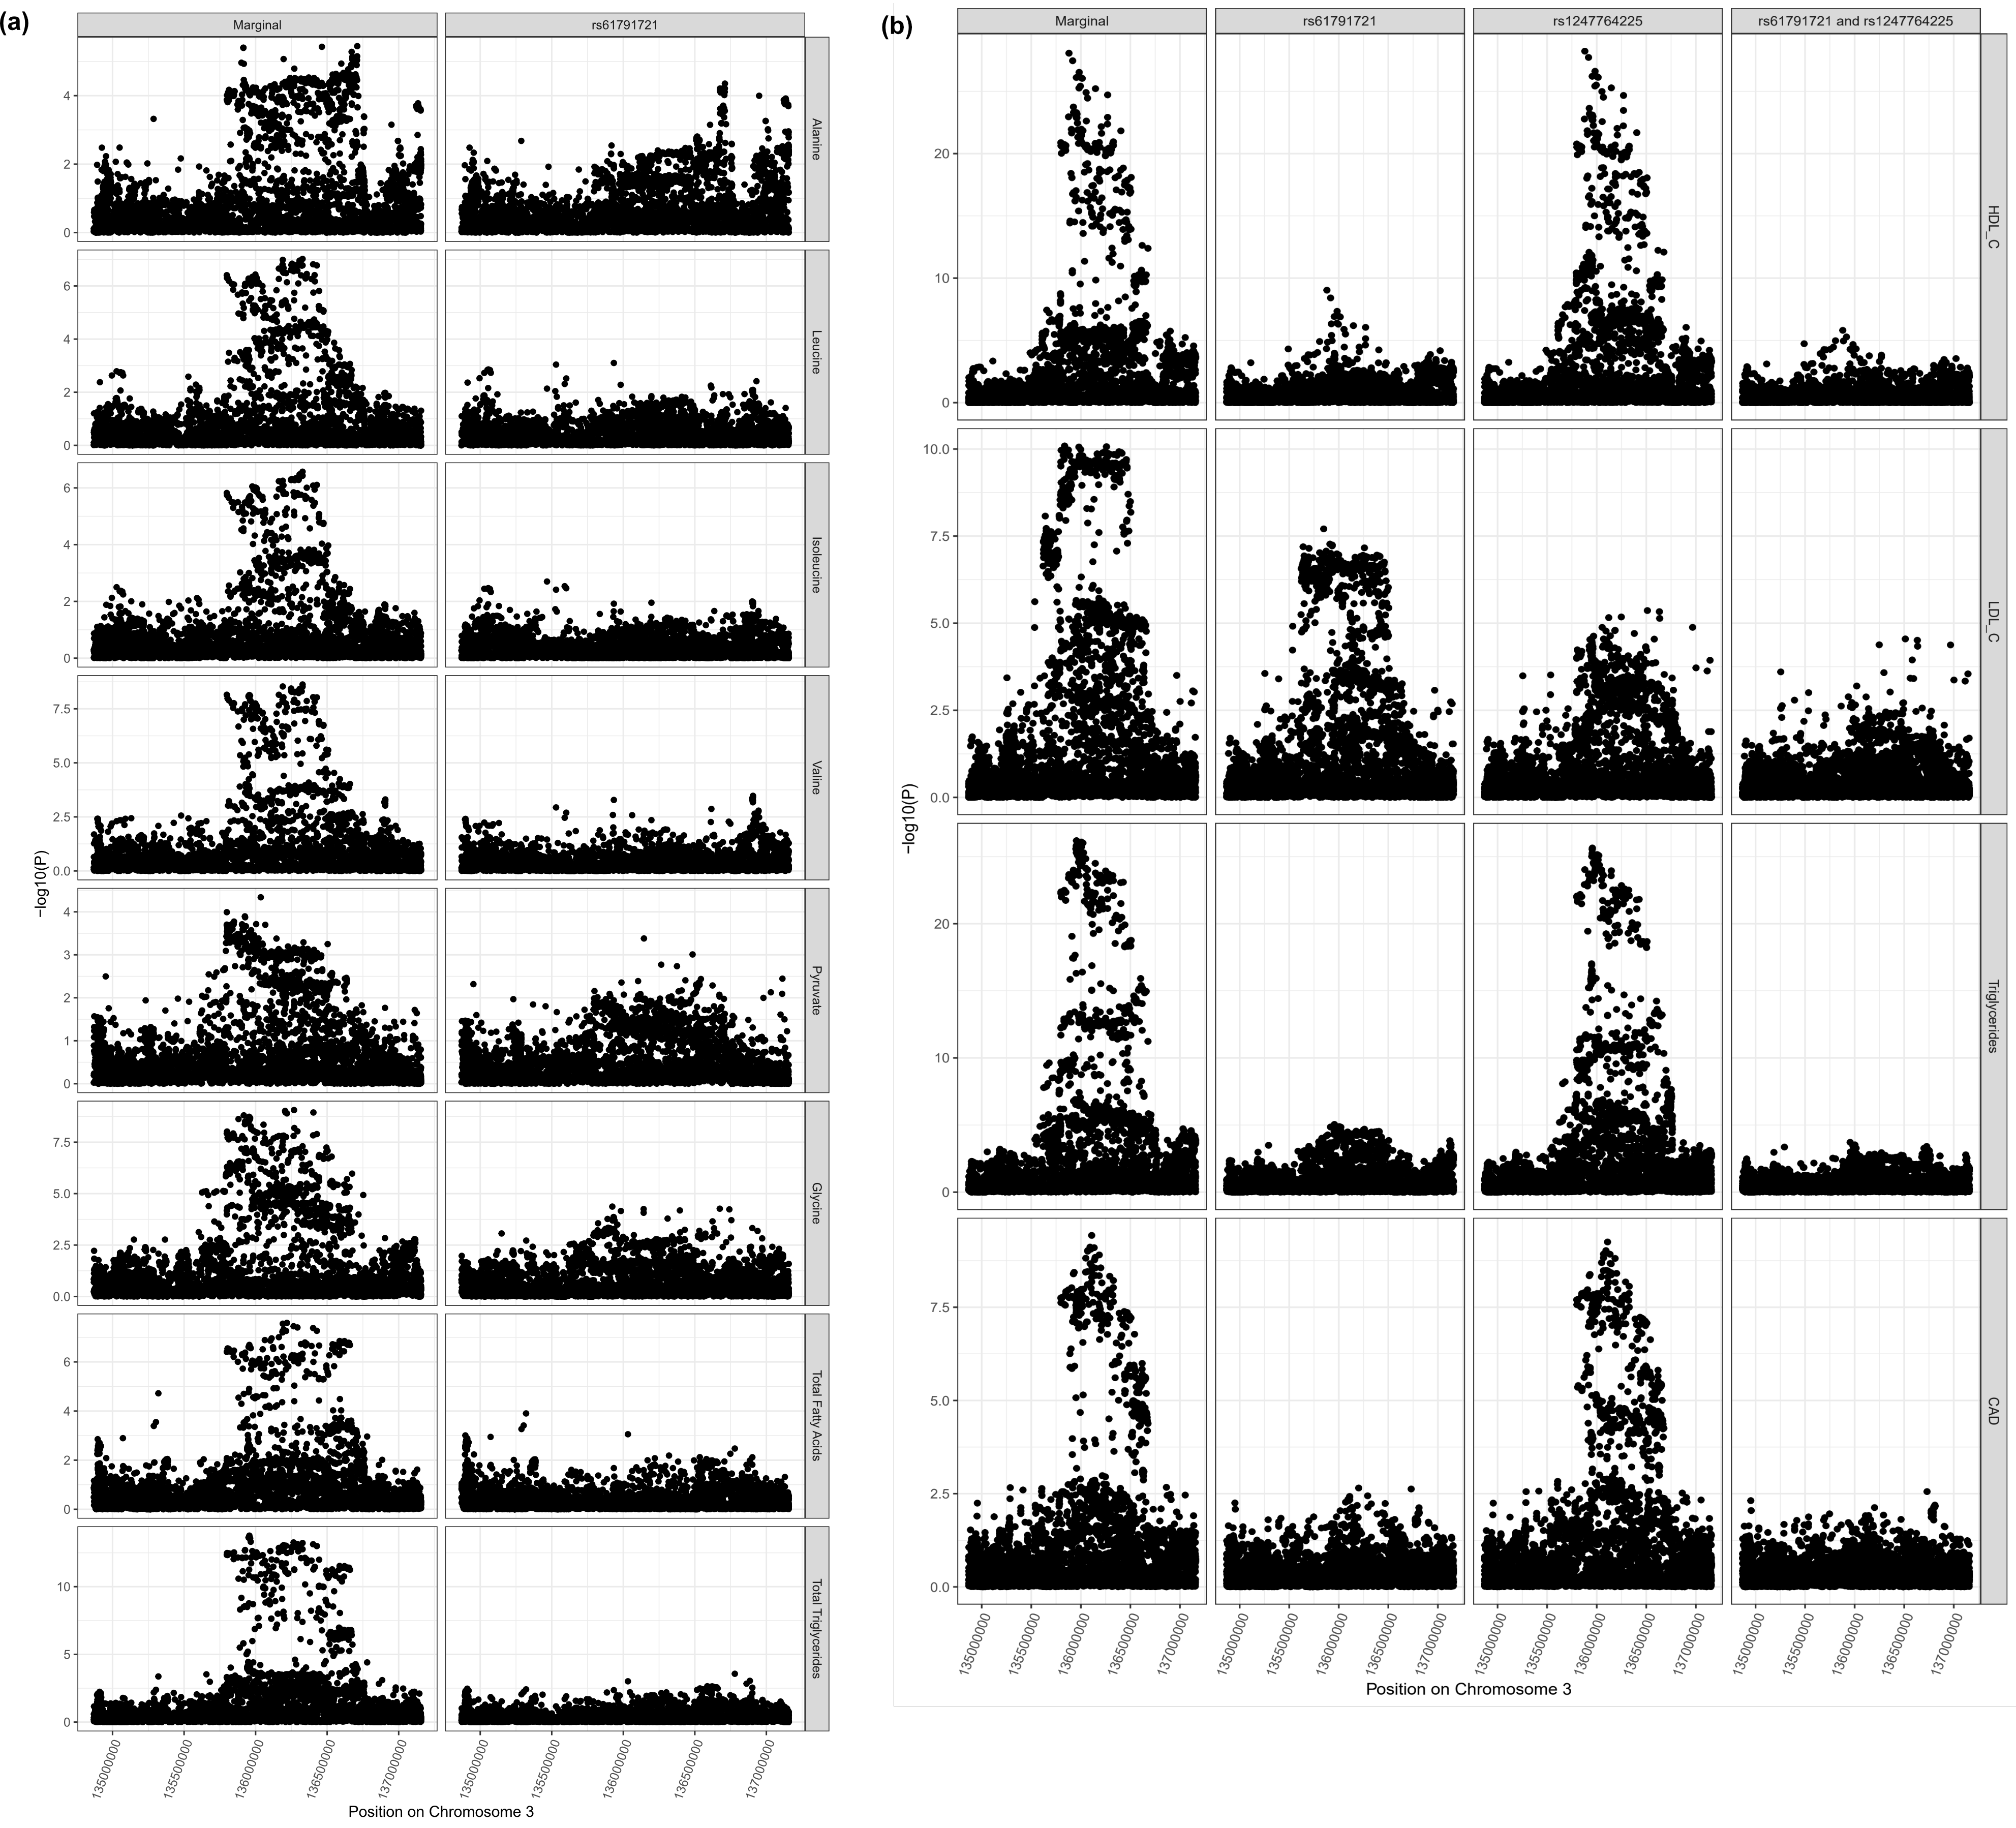

Supplement: supp [file elife-79348-supp-v1.zip › elife_poa_e79348_Figure_7_figure_supplement_3.tif]
